# Supplementary material for: Level and determinants of birth preparedness and complication readiness among pregnant women: A cross sectional study in a rural area in Bangladesh
Source: PubMed Central journal article supplement (PMC6296737; doi:10.1371/journal.pone.0209076), 2018-12-17
Supplement: pone.0209076.s002.pdf [file pone.0209076.s002.pdf]

**Matlab Maternal Neonatal and Child Health Extension Program (MNCH-Ext.)  
Form: Baseline Survey: Knowledge, Practice and Coverage**

Date: / /  Interviewers Code:  Listing ID#

**Interviewer's visit and status**

| Visit                | 1     | 2     | 3     | FINAL VISIT                                                                            |
|----------------------|-------|-------|-------|----------------------------------------------------------------------------------------|
| DATE                 | ..... | ..... | ..... | DAY: <input type="text"/><br>MONTH: <input type="text"/><br>YEAR: <input type="text"/> |
| RESULT               |       |       |       | RESULT CODE* <input type="text"/><br>INTERVIEWER'S CODE <input type="text"/>           |
| NEXT DATE VISIT TIME |       |       |       | TOTAL NUMBER OF VISIT <input type="text"/>                                             |

\* RESULT CODES  
 1=Interview Complete  
 2=No HH member OR competent respondent were present at home at time of HH visit  
 3=Interview cancelled  
 4=Refused to give interview  
 5=Woman who has recently delivered is absent  
 6=No recently delivered woman found  
 7=Others (specify) \_\_\_\_\_

General information of respondents woman (delivered live or still birth 1<sup>st</sup> January 2014 to 31<sup>th</sup> December 2014)

Name of Woman: \_\_\_\_\_ Age:  Years  
 Area: 1=HDSS  2=Non HDSS  Upazila: 1=Matlab North  2=Matlab South

Block: 1=E  2=F  3=G  4=N/A

Husband's Name: \_\_\_\_\_ Age:  Years

Cell Phone # (1): \_\_\_\_\_ Cell Phone # (2): \_\_\_\_\_

Bari Numbe  Household Number:  Cluster Number:

Address: Village: \_\_\_\_\_ P.O: \_\_\_\_\_ Union: \_\_\_\_\_  
 UpZ / P.S: \_\_\_\_\_ District: \_\_\_\_\_

Asset Score:  LMP:     
 DD MM YY

Delivery Date:     
 DD MM YY

Pregnancy Outcome: 1= Alive  2=Stillbirth

Education Woman  yrs Type of education: 1=Secular 2=Moktab 3=NGO 4=Other

Education Husband  yrs Type of education: 1=Secular 2=Moktab 3=NGO 4=Other

Time interview started: :

| No. | QUESTIONS & FILTERS | CODING RESPONSES | SKIP |
|-----|---------------------|------------------|------|
|-----|---------------------|------------------|------|

**SECTION 1: MOST RECENT BIRTH INFORMATION**

|     |                                                                                                      |                                                                                              |                          |
|-----|------------------------------------------------------------------------------------------------------|----------------------------------------------------------------------------------------------|--------------------------|
| 101 | CHECK FACE PAGE: BABY BORN DEAD                                                                      | 1=YES <input type="checkbox"/> → 201 2=NO <input type="checkbox"/>                           | <input type="checkbox"/> |
| 102 | From the survey, I know that you recently had a baby. What name was given to that/ those child(ren)? | CHILD 1 <input type="text"/><br>CHILD 2 <input type="text"/><br>CHILD 3 <input type="text"/> | <input type="checkbox"/> |

|     |                                  |                |                |                |  |                          |
|-----|----------------------------------|----------------|----------------|----------------|--|--------------------------|
| 103 | What is the status of child now? | <b>CHILD 1</b> | <b>CHILD 2</b> | <b>CHILD 3</b> |  | <input type="checkbox"/> |
|     |                                  | 1=Alive        | 1=Alive        | 1=Alive        |  |                          |
|     |                                  | 2=Dead         | 2=Dead         | 2=Dead         |  |                          |

**SECTION 2: PREGNANCY**

Now I would like to talk to you about pregnancy in general.

**Knowledge:**

|     |                                                                                                                               |                                    |                   |                 |                          |
|-----|-------------------------------------------------------------------------------------------------------------------------------|------------------------------------|-------------------|-----------------|--------------------------|
| 201 | Please tell me what complications may occur during pregnancy that needs medical<br><br>Anything else?<br>RECORD ALL RESPONSES |                                    | <b>UNPROMPTED</b> | <b>PROMPTED</b> |                          |
|     |                                                                                                                               | 1=Severe Headache                  | A                 | M               | <input type="checkbox"/> |
|     |                                                                                                                               | 2=Blurry Vision                    | B                 | N               | <input type="checkbox"/> |
|     |                                                                                                                               | 3=Reduced or Absent Fetal Movement | C                 | O               | <input type="checkbox"/> |
|     |                                                                                                                               | 4=High Blood Pressure              | D                 | P               | <input type="checkbox"/> |
|     |                                                                                                                               | 5=Edema of the face                | E                 | Q               | <input type="checkbox"/> |
|     |                                                                                                                               | 6=Eedema of the hands & feet       | F                 | R               | <input type="checkbox"/> |
|     |                                                                                                                               | 7=Convulsions                      | G                 | S               | <input type="checkbox"/> |
|     |                                                                                                                               | 8=Vaginal Bleeding                 | H                 | T               | <input type="checkbox"/> |
|     |                                                                                                                               | 9=Lower Abdominal Pain             | I                 | U               | <input type="checkbox"/> |
|     |                                                                                                                               | 10=None of Above                   | Z                 | Z               | <input type="checkbox"/> |

**Practices**

|     |                                                                                                                               |                  |  |                          |
|-----|-------------------------------------------------------------------------------------------------------------------------------|------------------|--|--------------------------|
| 202 | Now I would like to talk you about your <u>last</u> pregnancy. Did you receive check-up/antenatal care during this pregnancy? | 1=Yes            |  | <input type="checkbox"/> |
|     |                                                                                                                               | 2=No             |  | → 207                    |
|     |                                                                                                                               | 9=Don't Remember |  | → 207                    |

|     |                                     |                                |                          |
|-----|-------------------------------------|--------------------------------|--------------------------|
| 203 | How many times do you received ANC? | Times <input type="text"/>     | <input type="checkbox"/> |
|     |                                     | 99=Don't Know / Don't Remember | <input type="checkbox"/> |

|     |                                                                                                                  |                                      |                              |  |                                   |  |
|-----|------------------------------------------------------------------------------------------------------------------|--------------------------------------|------------------------------|--|-----------------------------------|--|
| 204 | Mention chronologically in how many months and from where, and who provided the ANC:<br><br>RECORD ALL RESPONSES | 1st ANC= <input type="text"/> months | <b>WHERE</b>                 |  | <b>WHO</b>                        |  |
|     |                                                                                                                  | 2nd ANC= <input type="text"/> months | 1=Home                       |  | 1= Doctors                        |  |
|     |                                                                                                                  | 3rd ANC= <input type="text"/> months | 2=H & FWC                    |  | 2= Nurse/Midwives                 |  |
|     |                                                                                                                  | 4th ANC= <input type="text"/> months | 3=Community Clinic           |  | 3= Family Welfare Assistant       |  |
|     |                                                                                                                  |                                      | 4=UHC South                  |  | 4= Family Welfare Visitor         |  |
|     |                                                                                                                  |                                      | 5=UHC North                  |  | 5= Traditional Birth Attendant    |  |
|     |                                                                                                                  |                                      | 6=Private Clinic Matlab      |  | 6= Community Health Care Provider |  |
|     |                                                                                                                  |                                      | 7=MCWC Chandpur              |  | 7= Health Assistant               |  |
|     |                                                                                                                  |                                      | 8=Private Clinic Chandpur    |  | 8= Others (Specify) _____         |  |
|     |                                                                                                                  |                                      | 9=Chandpur District Hospital |  |                                   |  |
|     |                                                                                                                  |                                      | 10=Other District Hospital   |  |                                   |  |
|     |                                                                                                                  |                                      | 11=Other MCWC                |  |                                   |  |
|     |                                                                                                                  |                                      | 12=Other Private Clinic      |  |                                   |  |
|     |                                                                                                                  |                                      | 13=Other UHC                 |  |                                   |  |
|     |                                                                                                                  |                                      | 14=ICMH, Matuail, Dhaka      |  |                                   |  |
|     |                                                                                                                  |                                      | 15=NGO                       |  |                                   |  |
|     |                                                                                                                  |                                      | 16=Others (Specify)          |  |                                   |  |

|     |                                                                                                                                                                                                                                                                |                         |                   |                 |                          |
|-----|----------------------------------------------------------------------------------------------------------------------------------------------------------------------------------------------------------------------------------------------------------------|-------------------------|-------------------|-----------------|--------------------------|
| 205 | Now I would like to ask you about your antenatal visits.<br><br>When you were pregnant with (NAME) (last pregnancy), what messages did you receive during at least one of your antenatal check-up?<br>RECORD ALL RESPONSES<br>THEN PROBE: Did you receive [ANY |                         | <b>UNPROMPTED</b> | <b>PROMPTED</b> |                          |
|     |                                                                                                                                                                                                                                                                | 1=Breastfeed            | A                 | M               | <input type="checkbox"/> |
|     |                                                                                                                                                                                                                                                                | 2=Danger Signs Maternal | B                 | N               | <input type="checkbox"/> |
|     |                                                                                                                                                                                                                                                                | 3=Birth Planning        | C                 | O               | <input type="checkbox"/> |
|     |                                                                                                                                                                                                                                                                | 4=Facility Delivery     | D                 | P               | <input type="checkbox"/> |
|     |                                                                                                                                                                                                                                                                | 5=Danger Signs Newborn  | E                 | Q               | <input type="checkbox"/> |
|     |                                                                                                                                                                                                                                                                | 6=Basic Care New Born   | F                 | R               | <input type="checkbox"/> |

|     |                                                                                                                                              |                                   |            |          |                          |
|-----|----------------------------------------------------------------------------------------------------------------------------------------------|-----------------------------------|------------|----------|--------------------------|
|     | ADDITIONAL MESSAGES]?                                                                                                                        | 7=Use Cleaning Delivery Kit       | G          | S        | <input type="checkbox"/> |
|     |                                                                                                                                              | 8=Other (Specify)                 | X          | X        | <input type="checkbox"/> |
| 206 | During pregnancy and before the delivery, did you or your family make any plans for the birth?                                               | 1=Yes                             |            |          | <input type="checkbox"/> |
|     |                                                                                                                                              | 2=No                              |            | →        | 301                      |
|     |                                                                                                                                              | 9=Don't Remember                  |            | →        | 301                      |
| 207 | Which plans did you or your family makes for the birth of (NAME)?<br>RECORD ALL RESPONSES<br>THEN PROBE: Did you make [ANY REMAINING PLANS]? |                                   | UNPROMPTED | PROMPTED |                          |
|     |                                                                                                                                              | 1=Identify Transport              | A          | M        | <input type="checkbox"/> |
|     |                                                                                                                                              | 2=Save Money                      | B          | N        | <input type="checkbox"/> |
|     |                                                                                                                                              | 3=Identify Facility For Delivery  | C          | O        | <input type="checkbox"/> |
|     |                                                                                                                                              | 4=Identify Provider For Delivery  | D          | P        | <input type="checkbox"/> |
|     |                                                                                                                                              | 5=Other (Specify)                 | X          | X        | <input type="checkbox"/> |
| 208 | CHECK 207: IF "IDENTIFIED FACILITY FOR DELIVERY ("3") 1=YES <input type="checkbox"/> 2=NO <input type="checkbox"/> →                         |                                   |            |          | 210                      |
| 209 | Where did you plan to give birth to (NAME)?                                                                                                  | 1=Home                            |            |          | <input type="checkbox"/> |
|     |                                                                                                                                              | 2=H & FWC                         |            |          |                          |
|     |                                                                                                                                              | 3=Community Clinic                |            |          |                          |
|     |                                                                                                                                              | 4=UHC South                       |            |          |                          |
|     |                                                                                                                                              | 5=UHC North                       |            |          |                          |
|     |                                                                                                                                              | 6=Private Clinic Matlab           |            |          |                          |
|     |                                                                                                                                              | 7=MCWC Chandpur                   |            |          |                          |
|     |                                                                                                                                              | 8=Private Clinic Chandpur         |            |          |                          |
|     |                                                                                                                                              | 9=Chandpur District Hospital      |            |          |                          |
|     |                                                                                                                                              | 10=Other District Hospital        |            |          |                          |
|     |                                                                                                                                              | 11=Other MCWC                     |            |          |                          |
|     |                                                                                                                                              | 12=Other Private Clinic           |            |          |                          |
|     |                                                                                                                                              | 13=Other UHC                      |            |          |                          |
|     |                                                                                                                                              | 14=ICMH, Matuail, Dhaka           |            |          |                          |
|     |                                                                                                                                              | 15=NGO                            |            |          |                          |
|     |                                                                                                                                              | 16=Others (Specify)               |            |          |                          |
| 210 | CHECK 207: IF "IDENTIFIED PROVIDER FOR DELIVERY" ("4") 1=YES <input type="checkbox"/> 2=NO <input type="checkbox"/> →                        |                                   |            |          | 301                      |
| 211 | Who did you select as the birth attendant?                                                                                                   | 1= Doctors                        |            |          | <input type="checkbox"/> |
|     |                                                                                                                                              | 2= Nurse/Midwives                 |            |          |                          |
|     |                                                                                                                                              | 3= Family Welfare Assistant       |            |          |                          |
|     |                                                                                                                                              | 4= Family Welfare Visitor         |            |          |                          |
|     |                                                                                                                                              | 5= Traditional Birth Attendant    |            |          |                          |
|     |                                                                                                                                              | 6= Community Health Care Provider |            |          |                          |
|     |                                                                                                                                              | 7= Health Assistant               |            |          |                          |
|     |                                                                                                                                              | 8= Others (Specify)               |            |          |                          |

| No. | QUESTIONS & FILTERS | CODING RESPONSES | SKIP |
|-----|---------------------|------------------|------|
|-----|---------------------|------------------|------|

### SECTION 3: DELIVERY

Now I would like to talk to you about childbirth.

#### Knowledge

|     |                                                                                                         |                              |            |          |                          |
|-----|---------------------------------------------------------------------------------------------------------|------------------------------|------------|----------|--------------------------|
| 301 | Now, please tell me what are the complications in women during child birth that need medical treatment? |                              | UNPROMPTED | PROMPTED |                          |
|     |                                                                                                         | 1=Excessive Vaginal Bleeding | A          | M        | <input type="checkbox"/> |
|     |                                                                                                         | 2=Foul- Smelling Discharge   | B          | N        | <input type="checkbox"/> |

|                                            |                                      |   |   |                          |
|--------------------------------------------|--------------------------------------|---|---|--------------------------|
| Anything else?<br><br>RECORD ALL RESPONSES | 3=High Fever                         | C | O | <input type="checkbox"/> |
|                                            | 4=Baby's Hand or Feet Come First     | D | P | <input type="checkbox"/> |
|                                            | 5=Baby Bad Position/Mal Presentation | E | Q | <input type="checkbox"/> |
|                                            | 6=Prolong Labour (>12 Hours)         | F | R | <input type="checkbox"/> |
|                                            | 7=Retained Placenta                  | G | S | <input type="checkbox"/> |
|                                            | 8=Torn Uterus                        | H | T | <input type="checkbox"/> |
|                                            | 9=Proloapsed Cord                    | I | U | <input type="checkbox"/> |
|                                            | 10=Cord Around The Neck              | J | V | <input type="checkbox"/> |
|                                            | 11=Convulsions                       | K | W | <input type="checkbox"/> |
|                                            | 12=Perineal Tear                     | L | Y | <input type="checkbox"/> |
|                                            | 13=None of Above                     | Z | Z | <input type="checkbox"/> |

### Practices

Now I would like to ask you some questions about the delivery of (NAME).

|     |                                                    |                                                                                                                                                                                                                                                                                                                                          |                          |
|-----|----------------------------------------------------|------------------------------------------------------------------------------------------------------------------------------------------------------------------------------------------------------------------------------------------------------------------------------------------------------------------------------------------|--------------------------|
| 302 | Where did you give birth to (NAME) ?               | 1=Home<br>2=H & FWC<br>3=Community Clinic<br>4=UHC South<br>5=UHC North<br>6=Private Clinic Matlab<br>7=MCWC Chandpur<br>8=Private Clinic Chandpur<br>9=Chandpur District Hospital<br>10=Other District Hospital<br>11=Other MCWC<br>12=Other Private Clinic<br>13=Other UHC<br>14=ICMH, Matuail, Dhaka<br>15=NGO<br>16=Others (Specify) | <input type="checkbox"/> |
| 303 | Who conducted the delivery of (NAME) ?             | 1= Doctors<br>2= Nurse/Midwives<br>3= Family Welfare Assistant<br>4= Family Welfare Visitor<br>5= Traditional Birth Attendant<br>6= Community Health Care Provider<br>7= Health Assistant<br>8=Village doctor<br>9= Others (Specify) _____                                                                                               | <input type="checkbox"/> |
| 304 | Did any one else help with the delivery of (NAME)? | 1=Yes<br>2=No                                                                                                                                                                                                                                                                                                                            | <input type="checkbox"/> |

→ 306

|     |                                                                                                                |                                                                                                                                                                                    |                          |
|-----|----------------------------------------------------------------------------------------------------------------|------------------------------------------------------------------------------------------------------------------------------------------------------------------------------------|--------------------------|
| 305 | If yes, who helped with the delivery, other than the birth attendant?<br>Any one else?<br>RECORD ALL RESPONSES | 1=Mother-In-Law/ Shashuri<br>2=Mother/ Ma<br>3=Sister/Boin<br>4=Sister-In-Law/Jal/ Nonod<br>5=Other Member of in-laws home<br>6=Other Member of father's home<br>7=Other Relatives | <input type="checkbox"/> |
|-----|----------------------------------------------------------------------------------------------------------------|------------------------------------------------------------------------------------------------------------------------------------------------------------------------------------|--------------------------|

|     |                                                                                                                                    |                                                                                                                                                                                                                                                      |                          |          |                                 |
|-----|------------------------------------------------------------------------------------------------------------------------------------|------------------------------------------------------------------------------------------------------------------------------------------------------------------------------------------------------------------------------------------------------|--------------------------|----------|---------------------------------|
|     |                                                                                                                                    | 8=Neighbor<br>9=Don't Remember                                                                                                                                                                                                                       |                          |          |                                 |
| 306 | CHECK 302: DELIVERED AT HOME?                                                                                                      | 1=YES                                                                                                                                                                                                                                                | <input type="checkbox"/> | 2=NO     | <input type="checkbox"/> → 314  |
| 307 | Did you have a clean birth/delivery kit?                                                                                           | 1=Yes<br>2=No                                                                                                                                                                                                                                        |                          |          | → 310                           |
| 308 | If yes, have you used the delivery kit?                                                                                            | 1=Yes<br>2=No                                                                                                                                                                                                                                        |                          |          | → 310                           |
| 309 | What did you uses the birth/ delivery kit for?<br><br>RECORDED ALL RESPONSES<br><br>THEN PROBE: Did you use [ANT REMAINING ITEMS]? |                                                                                                                                                                                                                                                      | UNPROMPTED               | PROMPTED |                                 |
|     |                                                                                                                                    | 1=Plastic Sheet For Delivery                                                                                                                                                                                                                         | A                        | M        | <input type="checkbox"/>        |
|     |                                                                                                                                    | 2=Soap To Wash Hands                                                                                                                                                                                                                                 | B                        | N        | <input type="checkbox"/>        |
|     |                                                                                                                                    | 3=Blade to Cut Cord                                                                                                                                                                                                                                  | C                        | O        | <input type="checkbox"/>        |
|     |                                                                                                                                    | 4=Thread to Tie Cord                                                                                                                                                                                                                                 | D                        | P        | <input type="checkbox"/>        |
|     |                                                                                                                                    | 5=Cotton                                                                                                                                                                                                                                             | E                        | Q        | <input type="checkbox"/>        |
|     |                                                                                                                                    | 6=Gauze                                                                                                                                                                                                                                              | F                        | R        | <input type="checkbox"/>        |
|     |                                                                                                                                    | 7=Other (Specify)                                                                                                                                                                                                                                    | X                        | X        | <input type="checkbox"/>        |
| 310 | Were any of the following procedures performed at the time of delivery?                                                            | a. Blood Transfusion                                                                                                                                                                                                                                 | 1=Yes                    | 2=No     | 9=Don't know                    |
|     |                                                                                                                                    | b. Fluid                                                                                                                                                                                                                                             | 1=Yes                    | 2=No     | 9=Don't know                    |
|     |                                                                                                                                    | c. Injection                                                                                                                                                                                                                                         | 1=Yes                    | 2=No     | 9=Don't know                    |
|     |                                                                                                                                    | d. Episiotomy                                                                                                                                                                                                                                        | 1=Yes                    | 2=No     | 9=Don't know                    |
|     |                                                                                                                                    | e. Received tablet Misoprostol                                                                                                                                                                                                                       | 1=Yes                    | 2=No     | 9=Don't know                    |
| 311 | CHECK 310: RECEIVED INJECTION ("C")                                                                                                | 1=YES                                                                                                                                                                                                                                                | <input type="checkbox"/> | 2=NO     | <input type="checkbox"/> → 314  |
| 312 | What was the injection for?<br><br>RECORD ALL RESPONSES                                                                            | 1=Speed Up Labour<br>2=Reduce Bleeding<br>3=Stop Convulsions<br>4=Other (Specify)<br>99=Don't Know                                                                                                                                                   |                          |          | <input type="checkbox"/>        |
| 313 | Who pushed the injection?                                                                                                          | 1= Doctors<br>2= Nurse/Midwives<br>3= Family Welfare Assistant<br>4= Family Welfare Visitor<br>5= Traditional Birth Attendant<br>6= Community Health Care Provider<br>7= Health Assistant<br>8=Village Doctor<br>9=Paramedic<br>10= Others (Specify) |                          |          | <input type="checkbox"/>        |
| 314 | What position would you prefer for delivery?                                                                                       | 1=Squatting Position<br>2=Semi-Squatting Position<br>3=Lying On Back<br>4=Lying On Back With Feet In Stirrups<br>5=Others (Specify)                                                                                                                  |                          |          | <input type="checkbox"/>        |
| 315 | In what position were you in during the delivery of (NAME)?                                                                        | 1=Squatting Position<br>2=Semi-Squatting Position<br>3=Lying On Back<br>4=Lying On Back With Feet In Stirrups                                                                                                                                        |                          |          | <input type="checkbox"/>        |
| 316 | CHECK 302: DELIVERED AT SC/HOSPITAL?                                                                                               | 1=YES                                                                                                                                                                                                                                                | <input type="checkbox"/> | 2=NO     | <input type="checkbox"/> → 318* |



|     |                                                                                                                                                                        |                                                                                                                                                                                                                                                                                                                                                                                                                                                                                             |                                 |
|-----|------------------------------------------------------------------------------------------------------------------------------------------------------------------------|---------------------------------------------------------------------------------------------------------------------------------------------------------------------------------------------------------------------------------------------------------------------------------------------------------------------------------------------------------------------------------------------------------------------------------------------------------------------------------------------|---------------------------------|
|     |                                                                                                                                                                        | 3=24 HOURS<br>4=42 DAYS<br>NO.....2 ↓<br>D. CONVULSION<br>YES .....1 →<br>1=PREGNANCY<br>2=DELIVERY<br>3=24 HOURS<br>4=42 DAYS<br>NO.....2 ↓<br>E. PROLONGED LABOR (> 12 HOURS)<br>YES .....1<br>NO.....2 ↓<br>F. RETAINED PLACENTA<br>YES .....1<br>NO.....2                                                                                                                                                                                                                               | <input type="checkbox"/>        |
| 320 | CHECK 319: AT LEAST ONE COMPLICATION?                                                                                                                                  | 1=YES <input type="checkbox"/> 2=NO <input type="checkbox"/> →                                                                                                                                                                                                                                                                                                                                                                                                                              | 332                             |
| 321 | Did you seek any care or treatment for any of these/this complication(s)?<br>PROBE: Any care/ treatment received at home?                                              | 1=Yes<br>2=No →                                                                                                                                                                                                                                                                                                                                                                                                                                                                             | <input type="checkbox"/><br>332 |
| 322 | Where did you <u>first</u> seek care/treatment for these/this complication(s)?<br><br>RECORD ONLY ONE ANSWER- WHERE WOMAN OR FAMILY <u>FIRST</u> SOUGHT CARE/TREATMENT | 1=Home<br>2=H & FWC<br>3=Community Clinic<br>4=UHC South<br>5=UHC North<br>6=Private Clinic Matlab<br>7=MCWC Chandpur<br>8=Private Clinic Chandpur<br>9=Chandpur District Hospital<br>10=Other District Hospital<br>11=Other MCWC<br><br>12=Other Private Clinic<br>13=Other UHC<br>14=ICMH, Matuail, Dhaka<br>15=NGO<br>16=Paramedic's Home<br>17=Village Doctor's Home<br>18=Pharmacy<br>19=Spitual/Healer Home<br>20=Kobiraj/Hakim Home<br>21=Homeopathic Chember<br>22=Others (Specify) | <input type="checkbox"/>        |
| 323 | Who provided this care/treatment?                                                                                                                                      | 1= Doctors<br>2= Nurse/Midwives                                                                                                                                                                                                                                                                                                                                                                                                                                                             | <input type="checkbox"/>        |

|     |                                                                                                                                     |                                                                                                                                                                                                                                                                                                                               |                              |
|-----|-------------------------------------------------------------------------------------------------------------------------------------|-------------------------------------------------------------------------------------------------------------------------------------------------------------------------------------------------------------------------------------------------------------------------------------------------------------------------------|------------------------------|
|     | RECORD ONLY ONE ANSWER- WITH WHOM WOMAN OR FAMILY <u>FIRST</u> SOUGHT CARE/TREATMENT                                                | 3= Family Welfare Assistant<br>4= Family Welfare Visitor<br>5= Traditional Birth Attendant<br>6= Community Health Care Provider<br>7= Health Assistant<br>8=Village doctor<br>9=Spiritual healer<br>10=Homeopathic<br>11=Kabiraj/Hakim<br>12=NGO worker<br>13= Others (Specify)                                               |                              |
| 324 | What type of care/treatment did you receive?<br><br>RECORD ALL RESPONSES                                                            | 1=Medicine From Pharmacy<br>2=Referral From CHRW<br>3=Advice From CHRW<br>4=Spiritual Water/ Substance<br>5=Amulets<br>6=Homeopathic Medicine<br>7=Injection Saline<br>8=Medicine From Doctor/Nurse<br>9=Medicine From Kabiraj/Hakim<br>10=Injection to Speed Labor<br>11=Others (Specify)                                    | <input type="checkbox"/>     |
| 325 | Were you referred to any other place for care /treatment of this/these complication(s)?<br><br>PROBE- CARE INSIDE/OUTSIDE THE HOME? | 1=Yes<br>2=No                                                                                                                                                                                                                                                                                                                 | <input type="checkbox"/> 401 |
| 326 | Where were you referred?                                                                                                            | 1=H & FWC<br>2=Community Clinic<br>3=UHC South<br>4=UHC North<br>5=Private Clinic Matlab<br>6=MCWC Chandpur<br>7=Private Clinic Chandpur<br>8=Chandpur District Hospital<br>9=Other District Hospital<br>10=Other MCWC<br>11=Other Private Clinic<br>12=Other UHC<br>13=ICMH, Matuail, Dhaka<br>14=NGO<br>15=Others (Specify) |                              |
| 327 | Why were you told to seek treatment at this other place?<br><br>RECORD ALL RESPONSES                                                | 1=No Surgery Equipment<br>2=High Blood Pressurre<br>3=For Better Treatment<br>4=Doctor Unavailable<br>5=No Arrangement For Blood Transfusion<br>6=Baby's Upward Position<br>7=Some Part of Baby Came Out<br>8=Baby Stool In Womb                                                                                              | <input type="checkbox"/>     |



|     |                                                                                                |                                                                                                                                                                                                                                                                                                                 |                                |
|-----|------------------------------------------------------------------------------------------------|-----------------------------------------------------------------------------------------------------------------------------------------------------------------------------------------------------------------------------------------------------------------------------------------------------------------|--------------------------------|
|     |                                                                                                | 9=Cervix did not open<br>10=Other (Specify)<br>99=Don't Know                                                                                                                                                                                                                                                    |                                |
| 328 | Did you go to this place?                                                                      | 1=Yes<br>2=No<br>3=Didn't go any where                                                                                                                                                                                                                                                                          | <input type="checkbox"/> → 331 |
| 329 | If yes, how long did you wait to seek care for this complication?                              | <input type="text"/> HH <input type="text"/> MM                                                                                                                                                                                                                                                                 |                                |
| 330 | If yes, did any body call you after you went to the referred place, to see how you were doing? | 1=Yes<br>2=No<br>99=Don't Know                                                                                                                                                                                                                                                                                  | <input type="checkbox"/>       |
| 331 | Why did you <u>not</u> go to the referred place?<br><br>RECORD ALL RESPONSES                   | 1=Woman Didn't Think Necessary<br>2=Husband /Family Didn't Think Necessary<br>3=Facility too far<br>4=No Transport<br>5=No Child Care<br>6=Too Expensive<br>7=Services are Poor Quality<br>8=Didn't Know Where To Go<br>9=No Time to Go<br>10=Money Not Easily Available<br>11=Other (Specify)<br>99=Don't Know | <input type="checkbox"/>       |
| 332 | CHECK 207: PLANNED FOR TRANSPORT?                                                              | 1=YES <input type="checkbox"/> 2=NO <input type="checkbox"/>                                                                                                                                                                                                                                                    | ↓ → 334                        |
| 333 | Did you use the transport you identified during pregnancy?                                     | 1=Yes<br>2=No                                                                                                                                                                                                                                                                                                   | <input type="checkbox"/>       |
| 334 | CHECK 207: SAVED MONEY?                                                                        | 1=YES <input type="checkbox"/> 2=NO <input type="checkbox"/>                                                                                                                                                                                                                                                    | ↓ → 401                        |
| 335 | Did you use the money that you saved during pregnancy?                                         | 1=Yes<br>2=No                                                                                                                                                                                                                                                                                                   | <input type="checkbox"/>       |

**SECTION 4: POSTPARTUM CARE FOR MOTHER**

Now I am going to ask you about the medical care you received for your self after the delivery of (NAME)

**Knowledge**

|     |                                                                                                                                                                                                                                        |                                                              |            |          |                          |
|-----|----------------------------------------------------------------------------------------------------------------------------------------------------------------------------------------------------------------------------------------|--------------------------------------------------------------|------------|----------|--------------------------|
| 401 | Now, please tell me what are the complications in a woman within 42 days after delivery that need medical treatment?<br><br>Anything else?<br><br>PROBE: IF 'FEVER' OR 'PAIN' ASK ABOUT TYPE OF FEVER OR PAIN.<br>RECORD ALL RESPONSES |                                                              | UNPROMPTED | PROMPTED |                          |
|     |                                                                                                                                                                                                                                        | 1=Excessive Vaginal Bleeding                                 | A          | M        | <input type="checkbox"/> |
|     |                                                                                                                                                                                                                                        | 2=Foul- Smelling Discharge                                   | B          | N        | <input type="checkbox"/> |
|     |                                                                                                                                                                                                                                        | 3=High Fever                                                 | C          | O        | <input type="checkbox"/> |
|     |                                                                                                                                                                                                                                        | 4=Inverted Nipples                                           | D          | P        | <input type="checkbox"/> |
|     |                                                                                                                                                                                                                                        | 5=Tetanus                                                    | E          | Q        | <input type="checkbox"/> |
|     |                                                                                                                                                                                                                                        | 6=Retained Placenta                                          | F          | R        | <input type="checkbox"/> |
|     |                                                                                                                                                                                                                                        | 7=Severe Abdominal Pain                                      | G          | S        | <input type="checkbox"/> |
|     |                                                                                                                                                                                                                                        | 8=Convulsions                                                | H          | T        | <input type="checkbox"/> |
|     |                                                                                                                                                                                                                                        | 9=Engorged Breasts                                           | I          | U        | <input type="checkbox"/> |
|     |                                                                                                                                                                                                                                        | 10=None of Above                                             | X          | X        | <input type="checkbox"/> |
| 402 | CHECK 302: HOME BIRTH?                                                                                                                                                                                                                 | 1=YES <input type="checkbox"/> 2=NO <input type="checkbox"/> | ↓ → 408    |          |                          |

| Practices |                                                                                                                                                                                          |                                                                                                                                                                                                                                                                                                                                          |                              |
|-----------|------------------------------------------------------------------------------------------------------------------------------------------------------------------------------------------|------------------------------------------------------------------------------------------------------------------------------------------------------------------------------------------------------------------------------------------------------------------------------------------------------------------------------------------|------------------------------|
| 403       | Now, I would like to ask you some questions about your health after the time of delivery.<br><br>After (NAME) was born, did you have a medical check-up?                                 | 1=Yes<br>2=No                                                                                                                                                                                                                                                                                                                            | <input type="checkbox"/> 501 |
| 404       | Where did you receive this <u>first</u> check-up?<br><br>IF RESPONDED MORE THAN ONE PLACE, ASK ABOUT THE PLACE WHERE SHE WENT <u>FIRST</u> FOR CHECK-UP.<br><br>CIRCLE ONLY ONE RESPONSE | 1=Home<br>2=H & FWC<br>3=Community Clinic<br>4=UHC South<br>5=UHC North<br>6=Private Clinic Matlab<br>7=MCWC Chandpur<br>8=Private Clinic Chandpur<br>9=Chandpur District Hospital<br>10=Other District Hospital<br>11=Other MCWC<br>12=Other Private Clinic<br>13=Other UHC<br>14=ICMH, Matuail, Dhaka<br>15=NGO<br>16=Others (Specify) | <input type="checkbox"/>     |
| 405       | Who checked your health at that time?<br><br>IF RESPONDED MORE THAN ONE PLACE, ASK ABOUT THE PERSON WHO <u>FIRST</u> CHECKED HER HEALTH.<br><br>CIRCLE ONLY ONE RESPONSE                 | 1= Doctors<br>2= Nurse/Midwives<br>3= Family Welfare Assistant<br>4= Family Welfare Visitor<br>5= Traditional Birth Attendant<br>6= Community Health Care Provider<br>7= Health Assistant<br>8=Village doctor<br>9=Spiritual healer<br>10=Homeopathic<br>11=Kabiraj/Hakim<br>12=NGO worker<br>13= Others (Specify)                       | <input type="checkbox"/>     |
| 406       | How many days or weeks after the delivery did you first check-up take place?<br><br>RECORD '00' DAYS IF SAME DAY                                                                         | Days <input type="text"/> <input type="text"/><br>Weeks <input type="text"/> <input type="text"/><br>99=Don't Know                                                                                                                                                                                                                       | <input type="checkbox"/>     |
| 407       | Did you have this check-up because you were sick or was if a routine check-up?                                                                                                           | 1=Sick<br>2=Routine<br>3=Both<br>9=Don't Remember                                                                                                                                                                                                                                                                                        | <input type="checkbox"/>     |
| 408       | CHECK FACE PAGE: BABY BORN DEAD ('2')?                                                                                                                                                   | 1=YES <input type="checkbox"/> → 701 2=NO <input type="checkbox"/>                                                                                                                                                                                                                                                                       | <input type="checkbox"/>     |

### SECTION 5: IMMEDIATE NEWBORN CARE

Now I am going to ask you about care of the newborn baby.

#### Knowledge of newborn care and danger signs

| 501 |                                                                                           | UNPROMPTED                     | PROMPTED |                            |
|-----|-------------------------------------------------------------------------------------------|--------------------------------|----------|----------------------------|
|     | What are some serious health problems that can occur during the first 7 days after birth. | 1=Difficulty or Fast Breathing | A        | M <input type="checkbox"/> |

|                  |                                                                                                                                              |                                                                                                                                                                                                                                                     |                                                      |                                                    |                                                                                                                                                                                                                                                          |
|------------------|----------------------------------------------------------------------------------------------------------------------------------------------|-----------------------------------------------------------------------------------------------------------------------------------------------------------------------------------------------------------------------------------------------------|------------------------------------------------------|----------------------------------------------------|----------------------------------------------------------------------------------------------------------------------------------------------------------------------------------------------------------------------------------------------------------|
|                  | that could endanger the life of a newborn baby?<br><br>RECORD ALL RESPONSES                                                                  | 2=Poor Sucking or Feeding<br>3=Yellow Coloration Skin/Eye<br>4=Pus/Discharge From Umbilical Cord<br>5=Pus/Discharge From Eyes<br>6=Very Small Baby<br>7=Convulsions<br>8=Lethargy, Unconsciousness<br>9=None of the Above                           | B<br>C<br>D<br>E<br>F<br>G<br>H<br>X                 | N<br>O<br>P<br>Q<br>R<br>S<br>T<br>X               | <input type="checkbox"/><br><input type="checkbox"/><br><input type="checkbox"/><br><input type="checkbox"/><br><input type="checkbox"/><br><input type="checkbox"/><br><input type="checkbox"/><br><input type="checkbox"/><br><input type="checkbox"/> |
| 502              | Could you name a few basic cares that can be provided to baby just after birth?<br><br>RECORD ALL RESPONSES                                  |                                                                                                                                                                                                                                                     | <b>UNPROMPTED</b>                                    | <b>PROMPTED</b>                                    | <input type="checkbox"/><br><input type="checkbox"/><br><input type="checkbox"/><br><input type="checkbox"/><br><input type="checkbox"/><br><input type="checkbox"/><br><input type="checkbox"/>                                                         |
|                  |                                                                                                                                              | 1=Dry and Wrapping<br>2=Establish Breast Feeding<br>3=Cord Care<br>4=Eye Care<br>5=Others (Specify)<br>99=Don't Known                                                                                                                               | A<br>B<br>C<br>D<br>E<br>X                           | M<br>N<br>O<br>P<br>Q<br>X                         | <input type="checkbox"/><br><input type="checkbox"/><br><input type="checkbox"/><br><input type="checkbox"/><br><input type="checkbox"/><br><input type="checkbox"/>                                                                                     |
| 503              | Are there any benefits of breast feeding?                                                                                                    | 1=Yes<br>2=No                                                                                                                                                                                                                                       |                                                      |                                                    | <input type="checkbox"/><br><input type="checkbox"/>                                                                                                                                                                                                     |
| 504              | If yes, what are the benefits of breast feeding in your opinion?<br><br>RECORD ALL RESPONSES<br><br>PROBE: FOR BABY, FOR MOTHER, FOR FAMILY? | <b>FOR BABY</b><br>1=Breast Milk Contains All Nutrients<br>2=For Growth of Baby Up To 6 Months<br>3=Baby Can Digest Easily<br>4=Safe For Baby<br>5=Breast Feed Prevents Infectious Disease<br>6=Helps Growth of Brain Of Baby<br>7=Survival of Baby | <b>UNPROMPTED</b><br>A<br>B<br>C<br>E<br>E<br>F<br>G | <b>PROMPTED</b><br>M<br>N<br>O<br>P<br>Q<br>R<br>S | <input type="checkbox"/><br><input type="checkbox"/><br><input type="checkbox"/><br><input type="checkbox"/><br><input type="checkbox"/><br><input type="checkbox"/><br><input type="checkbox"/><br><input type="checkbox"/>                             |
|                  |                                                                                                                                              | <b>MOTHER</b><br>1=Makes a Bond Between Mom And Baby<br>2=Can Reduce Risk Of Pregnancy<br>3=Uterus Becomes Normal Size Quickly<br>4=Prevents Anemia By Reducing Post- Partum Bleeding<br>5=Reduce Breast and Uterine Cancer                         | <b>UNPROMPTED</b><br>A<br>B<br>C<br>D<br>E           | <b>PROMPTED</b><br>M<br>N<br>O<br>P<br>Q           | <input type="checkbox"/><br><input type="checkbox"/><br><input type="checkbox"/><br><input type="checkbox"/><br><input type="checkbox"/>                                                                                                                 |
|                  |                                                                                                                                              | 6=Readily Available                                                                                                                                                                                                                                 | F                                                    | R                                                  | <input type="checkbox"/>                                                                                                                                                                                                                                 |
|                  |                                                                                                                                              | <b>FAMILY</b><br>1=Saves Money Not Buying Extra Milk/Food<br>2=Reduces Treatment Cost Of Baby<br>3=Others (Specify)<br>4=None of The Above                                                                                                          | <b>UNPROMPTED</b><br>A<br>B<br>C<br>D                | <b>PROMPTED</b><br>M<br>N<br>O<br>P                | <input type="checkbox"/><br><input type="checkbox"/><br><input type="checkbox"/><br><input type="checkbox"/>                                                                                                                                             |
| <b>Practices</b> |                                                                                                                                              |                                                                                                                                                                                                                                                     |                                                      |                                                    |                                                                                                                                                                                                                                                          |
| 505              | What was the first thing put in (NAME)'s mouth after birth?                                                                                  | 1=Colostrum<br>2=Plain Water<br>3=Glucose Water/Sugar<br>4=Honey<br>5=Mustard Oil<br>6=Any Milk Other Than Breast Milk<br>7=Other Liquid<br>8=Other (Specify)                                                                                       |                                                      |                                                    | <input type="checkbox"/><br><input type="checkbox"/><br><input type="checkbox"/><br><input type="checkbox"/><br><input type="checkbox"/><br><input type="checkbox"/><br><input type="checkbox"/><br><input type="checkbox"/>                             |
| 506              | Was (NAME) given colostrums?                                                                                                                 | 1=Yes                                                                                                                                                                                                                                               |                                                      |                                                    | <input type="checkbox"/>                                                                                                                                                                                                                                 |

→ 505

|     |                                                                                                                          |                                                   |   |                      |
|-----|--------------------------------------------------------------------------------------------------------------------------|---------------------------------------------------|---|----------------------|
|     |                                                                                                                          | 2=No                                              |   |                      |
| 507 | When did you start breastfeeding (NAME) after birth?                                                                     | Minutes <input type="text"/> <input type="text"/> |   | <input type="text"/> |
|     |                                                                                                                          | Hours <input type="text"/> <input type="text"/>   |   |                      |
|     |                                                                                                                          | Days <input type="text"/> <input type="text"/>    |   |                      |
|     |                                                                                                                          | 98=Never Breastfed                                |   |                      |
|     |                                                                                                                          | 99=Don't Know                                     |   |                      |
| 508 | Did you throw out anything (milk) from your breast before giving breast milk to (NAME)?                                  | 1=Yes                                             |   | <input type="text"/> |
|     |                                                                                                                          | 2=No                                              |   |                      |
| 509 | Did (NAME) cry immediately after birth?                                                                                  | 1=Yes                                             | → | 512                  |
|     |                                                                                                                          | 2=No                                              |   | <input type="text"/> |
|     |                                                                                                                          | 9=Don't Remember                                  |   |                      |
| 510 | Did (NAME) need help breathing or crying shortly after birth?                                                            | 1=Yes                                             |   | <input type="text"/> |
|     |                                                                                                                          | 2=No                                              |   |                      |
|     |                                                                                                                          | 9=Don't Remember                                  | → | 512                  |
| 511 | What was done to help (NAME) cry or breath at the time of birth?<br>(DO NOT SUGGEST ANSWERS)<br><br>RECORD ALL RESPONSES | 1=Nothing Mentioned                               |   | <input type="text"/> |
|     |                                                                                                                          | 2=Dried The Baby                                  |   |                      |
|     |                                                                                                                          | 3=Rubbed Back                                     |   |                      |
|     |                                                                                                                          | 4=Rubbed The Feet                                 |   |                      |
|     |                                                                                                                          | 5=Mouth to Mouth Resuscitation                    |   |                      |
|     |                                                                                                                          | 6=Heated the Cord                                 |   |                      |
|     |                                                                                                                          | 7=Slapped the Baby                                |   |                      |
|     |                                                                                                                          | 8=Held the Baby Upside Down                       |   |                      |
|     |                                                                                                                          | 9=Other (Specify)                                 |   |                      |
| 512 | What was used to cut the umbilical cord?                                                                                 | 1=Blade (Normal)                                  |   | <input type="text"/> |
|     |                                                                                                                          | 2=Sterile Bleed Supplied In Kit                   |   |                      |
|     |                                                                                                                          | 3=Bambo Slice/Basher Tol                          |   |                      |
|     |                                                                                                                          | 4=Scissor/Kachi                                   |   |                      |
|     |                                                                                                                          | 5=Sterile Surgical Bleed                          |   |                      |
|     |                                                                                                                          | 6=Facility Delivery                               | → | 514                  |
|     |                                                                                                                          | 7=Other (Specify)                                 |   |                      |
|     |                                                                                                                          | 99=Don't Know/ Remember                           |   |                      |

|     |                                                                       |                                  |   |                      |
|-----|-----------------------------------------------------------------------|----------------------------------|---|----------------------|
| 513 | Was the item used to cut the cord boiled and /or sterilized?          | 1=Yes                            |   | <input type="text"/> |
|     |                                                                       | 2=No                             |   |                      |
|     |                                                                       | 9=Don't Remember                 |   |                      |
| 514 | What was used to tie the cord?                                        | 1=Sterile Threads From Birth Kit |   | <input type="text"/> |
|     |                                                                       | 2=Cotton Threads                 |   |                      |
|     |                                                                       | 3=Nylon Threads                  |   |                      |
|     |                                                                       | 4=Thread of fishing net          |   |                      |
|     |                                                                       | 5=Facility Delivery              | → | 516                  |
|     |                                                                       | 6=Other (Specify)                |   |                      |
|     |                                                                       | 9=Don't Remember                 |   |                      |
| 515 | Was the item used to tie the cord boiled?                             | 1=Yes                            |   | <input type="text"/> |
|     |                                                                       | 2=No                             |   |                      |
|     |                                                                       | 9=Don't Remember                 |   |                      |
| 516 | Was anything applied to the cord immediately after cutting and tying? | 1=Yes                            |   | <input type="text"/> |
|     |                                                                       | 2=No                             | → | 518                  |
|     |                                                                       | 9=Don't Remember                 |   |                      |

|     |                                                                                                  |                                                                                                                                                                                                                                                                                                                                                                      |                          |
|-----|--------------------------------------------------------------------------------------------------|----------------------------------------------------------------------------------------------------------------------------------------------------------------------------------------------------------------------------------------------------------------------------------------------------------------------------------------------------------------------|--------------------------|
| 517 | <p>What was applied to the cord just after cutting the cord?</p> <p>RECORD ALL RESPONSES</p>     | <p>1=Antibiotic (Powder/Ointment)</p> <p>2=Savlon</p> <p>3=Dettol</p> <p>4=Alcohol/Spirit</p> <p>5=Mustard Oil With Garlic</p> <p>6=Chal Chibano</p> <p>7=Turmeric/ Turmeric Juice/Turmeric peel</p> <p>8=Ginger Juice</p> <p>9=Vermilion</p> <p>10=Boric Powder</p> <p>11=Gentian Violet</p> <p>12=Talcum Powder</p> <p>13=Other (Specify)</p> <p>99=Don't Know</p> | <input type="checkbox"/> |
| 518 | <p>When was (NAME) bathed for the first time? The first, second, third day of life or later?</p> | <p>1= &lt; 24 Hrs Of Birth</p> <p>2=First Day (&gt; 24 HRS)</p> <p>3=Second Day</p> <p>4=Third Day</p> <p>5=Later</p> <p>9=Don't Remember</p>                                                                                                                                                                                                                        | <input type="checkbox"/> |

**SECTION 6: NEWBORN CARE: FIRST MONTH & BREAST FEEDING**

Now, I would like to ask you some question about what happened during the first months of (NAME's) life.

|     |                                                                                                                                       |                                                                                                                                                                                                                                                              |                                |
|-----|---------------------------------------------------------------------------------------------------------------------------------------|--------------------------------------------------------------------------------------------------------------------------------------------------------------------------------------------------------------------------------------------------------------|--------------------------------|
| 601 | <p>Before the cord fell off, what was applied to it in the days after delivery?</p> <p>Anything else?</p> <p>RECORD ALL RESPONSES</p> | <p>1=Nothing</p> <p>2=Antibiotics</p> <p>3=Antiseptic (Savlon)</p> <p>4=Dettol</p> <p>5=Alcohol/Spirit</p> <p>5=Mustard Oil With Garlic</p> <p>6=Ground Rice</p> <p>7=Turmeric/ Turmeric Paste/ Turmeric Powder</p> <p>8=Ginger Juice</p> <p>9=Vermilion</p> | <input type="checkbox"/>       |
|     |                                                                                                                                       | <p>10=Boric Power</p> <p>11=Gentian Violet</p> <p>12=Other Private Clinic</p> <p>13=Other (Specify)</p> <p>14=Nothing</p> <p>99=Don't Know</p>                                                                                                               |                                |
| 602 | <p>After (NAME) was born, did any medical persons/ health worker check (NAME)'s health?</p>                                           | <p>1=Yes</p> <p>2=No</p> <p>9=Don't Remember</p>                                                                                                                                                                                                             | <input type="checkbox"/> → 607 |
| 603 | <p>How many days or weeks after the delivery did (NAME)'s first check take place?</p> <p>RECORD '00' DAYS IS SAME DAY</p>             | <p>DAYS AFTER DELIVERY <input type="text"/> <input type="text"/></p> <p>WEEKS AFTER DELIVERY <input type="text"/> <input type="text"/></p> <p>99=DON'T KNOW/ REMEMBER</p>                                                                                    | <input type="checkbox"/>       |
| 604 | <p>Who checked (NAME)'s health at that time?</p>                                                                                      | <p>1= Doctors</p> <p>2= Nurse/Midwives</p>                                                                                                                                                                                                                   | <input type="checkbox"/>       |

|     |                                                                      |                                                                                                                                                                                                                                                                                                                                          |                          |
|-----|----------------------------------------------------------------------|------------------------------------------------------------------------------------------------------------------------------------------------------------------------------------------------------------------------------------------------------------------------------------------------------------------------------------------|--------------------------|
|     |                                                                      | 3= Family Welfare Assistant<br>4= Family Welfare Visitor<br>5= Traditional Birth Attendant<br>6= Community Health Care Provider<br>7= Health Assistant<br>8=Village doctor<br>9=Spiritual healer<br>10=Homeopathic<br>11=Kabiraj/Hakim<br>12=NGO worker<br>13= Others (Specify)                                                          |                          |
| 605 | Where did the <u>first</u> check-up take place?                      | 1=Home<br>2=H & FWC<br>3=Community Clinic<br>4=UHC South<br>5=UHC North<br>6=Private Clinic Matlab<br>7=MCWC Chandpur<br>8=Private Clinic Chandpur<br>9=Chandpur District Hospital<br>10=Other District Hospital<br>11=Other MCWC<br>12=Other Private Clinic<br>13=Other UHC<br>14=ICMH, Matuail, Dhaka<br>15=NGO<br>16=Others (Specify) | <input type="checkbox"/> |
| 606 | Was this check because (NAME) was sick or was it a routine check-up? | 1=Sick<br>2=Routine<br>3=Both<br>9=Don't Remember                                                                                                                                                                                                                                                                                        | <input type="checkbox"/> |

|     |                                                                                                         |                                                              |       |      |              |                          |
|-----|---------------------------------------------------------------------------------------------------------|--------------------------------------------------------------|-------|------|--------------|--------------------------|
| 607 | During the first month of life did (NAME) have any of the following problems?                           | Fever                                                        | 1=Yes | 2=No | 9=Don't know | <input type="checkbox"/> |
|     |                                                                                                         | Difficulty Breathing                                         | 1=Yes | 2=No | 9=Don't know | <input type="checkbox"/> |
|     |                                                                                                         | Jaundice                                                     | 1=Yes | 2=No | 9=Don't know | <input type="checkbox"/> |
|     |                                                                                                         | Diarrhea                                                     | 1=Yes | 2=No | 9=Don't know | <input type="checkbox"/> |
|     |                                                                                                         | Umbilical Cord Infection                                     | 1=Yes | 2=No | 9=Don't know | <input type="checkbox"/> |
|     |                                                                                                         | Convulsions                                                  | 1=Yes | 2=No | 9=Don't know | <input type="checkbox"/> |
|     |                                                                                                         | Feeding Problem                                              | 1=Yes | 2=No | 9=Don't know | <input type="checkbox"/> |
| 608 | CHECK 607: AT LEAST ONE PROBLEM?                                                                        | 1=YES <input type="checkbox"/> 2=NO <input type="checkbox"/> |       |      | → 617        | <input type="checkbox"/> |
| 609 | Did you seek any care or treatment for any of this/these problem(s) (including at home or other place)? | 1=Yes                                                        |       |      |              | <input type="checkbox"/> |
|     |                                                                                                         | 2=No                                                         |       |      |              | → 617                    |
| 610 | Where did (NAME) <u>first</u> seek care/treatment for these/this problem(s)?                            | 1=Home                                                       |       |      |              | <input type="checkbox"/> |
|     |                                                                                                         | 2=H & FWC                                                    |       |      |              |                          |
|     |                                                                                                         | 3=Community Clinic                                           |       |      |              |                          |
|     | PROBLEMS ONLY FOR FIRST MONTH OF LIFE                                                                   | 4=UHC South                                                  |       |      |              |                          |

|     |                                                                                                                                                                      |                                                                                                                                                                                                                                                                                                                                    |                              |
|-----|----------------------------------------------------------------------------------------------------------------------------------------------------------------------|------------------------------------------------------------------------------------------------------------------------------------------------------------------------------------------------------------------------------------------------------------------------------------------------------------------------------------|------------------------------|
|     | RECORD ONLY ONE ANSWER- WHERE WOMAN OR FAMILY <u>FIRST</u> SOUGHT CARE/TREATMENT                                                                                     | 5=UHC North<br>6=Private Clinic Matlab<br>7=MCWC Chandpur<br>8=Private Clinic Chandpur<br>9=Chandpur District Hospital<br>10=Other District Hospital<br>11=Other MCWC<br>12=Other Private Clinic<br>13=Other UHC<br>14=ICMH, Matuail, Dhaka<br>15=NGO<br>16=Matlab icddr,b<br>17=Pharmacy<br>18=Homeopathic<br>19=Others (Specify) |                              |
| 611 | Who provided this care/treatment?<br><br>PROBLEMS ONLY FOR FIRST MONTH OF LIFE<br><br>RECORD ONLY ONE ANSWER- WITH WHOM OR FAMILY <u>FIRST</u> SOUGHT CARE/TREATMENT | 1= Doctors<br>2= Nurse/Midwives<br>3= Family Welfare Assistant<br>4= Family Welfare Visitor<br>5= Traditional Birth Attendant<br>6= Community Health Care Provider<br>7= Health Assistant<br>8=Village doctor<br>9=Spiritual healer<br>10=Homeopathic<br>11=Kabiraj/Hakim<br>12=NGO worker<br>13= Others (Specify)                 | <input type="checkbox"/>     |
| 612 | What type of treatment did (NAME) receive?<br><br>RECORD ALL RESPONSES                                                                                               | 1=Medicine From Pharmacy<br>2=Referral From FWV/CHCP<br>3=Advice From FWV/CHCP<br>4=Spiritual Water/ Substance                                                                                                                                                                                                                     | <input type="checkbox"/>     |
|     | PROBLEMS ONLY FOR FIRST MONTH OF LIFE                                                                                                                                | 5=Amulets<br>6=Homeopathic Medicine<br>7=Injection Saline<br>8=Medicine From Doctor/Nurse<br>9=Medicine From Kabiraj/Hakim<br>10=Others (Specify)                                                                                                                                                                                  |                              |
| 613 | Was (NAME) referred to any other place for care/treatment of these/this problem(s)?<br><br>PROBLEMS ONLY FOR FIRST MONTH OF LIFE                                     | 1=Yes<br>2=No                                                                                                                                                                                                                                                                                                                      | <input type="checkbox"/> 617 |
| 614 | Where was (NAME) referred?<br><br>PROBLEMS ONLY FOR FIRST MONTH OF LIFE                                                                                              | 1=Home<br>2=H & FWC<br>3=Community Clinic<br>4=UHC South<br>5=UHC North<br>6=Private Clinic Matlab<br>7=MCWC Chandpur                                                                                                                                                                                                              | <input type="checkbox"/>     |

|  |  |                                                                                                                                                                                                                                      |  |
|--|--|--------------------------------------------------------------------------------------------------------------------------------------------------------------------------------------------------------------------------------------|--|
|  |  | 8=Private Clinic Chandpur<br>9=Chandpur District Hospital<br>10=Other District Hospital<br>11=Other MCWC<br>12=Other Private Clinic<br>13=Other UHC<br>14=ICMH, Matuail, Dhaka<br>15=NGO<br>16=Matlab icddr,b<br>17=Others (Specify) |  |
|--|--|--------------------------------------------------------------------------------------------------------------------------------------------------------------------------------------------------------------------------------------|--|

|     |                                                                        |               |                                 |
|-----|------------------------------------------------------------------------|---------------|---------------------------------|
| 615 | Did you go to referred place?<br>PROBLEMS ONLY FOR FIRST MONTH OF LIFE | 1=Yes<br>2=No | 617<br><input type="checkbox"/> |
|-----|------------------------------------------------------------------------|---------------|---------------------------------|

|     |                                                                                                                   |                                                                                                                                                                                                                                                                                                                                                             |                          |
|-----|-------------------------------------------------------------------------------------------------------------------|-------------------------------------------------------------------------------------------------------------------------------------------------------------------------------------------------------------------------------------------------------------------------------------------------------------------------------------------------------------|--------------------------|
| 616 | If no, why did you not go to the referred place?<br>RECORD ALL RESPONSES<br>PROBLEMS ONLY FOR FIRST MONTH OF LIFE | 1=Mother didn't think it was necessary<br>2=Husband /Family Didn't think it was necessary<br>3= Other necessary works<br>4=Facility Too Far<br>5=No Transport<br>6=No Child Care<br>7=Too Expensive<br>8=Services are Poor Quality<br>9=Didn't Know Where To Go<br>10=No Time To Go<br>11=Money not easily available<br>12=Other (Specify)<br>99=Don't Know | <input type="checkbox"/> |
|-----|-------------------------------------------------------------------------------------------------------------------|-------------------------------------------------------------------------------------------------------------------------------------------------------------------------------------------------------------------------------------------------------------------------------------------------------------------------------------------------------------|--------------------------|

Now, I am going to ask you some questions about the type of food given to (NAME).

|     |                                                |                                                                                                                                                                        |                          |
|-----|------------------------------------------------|------------------------------------------------------------------------------------------------------------------------------------------------------------------------|--------------------------|
| 617 | For how many month did you breast feed (NAME)? | Months <input type="text"/> <input type="text"/><br>Days <input type="text"/> <input type="text"/><br>96= Never Breastfed<br>98= Still Breastfeeding<br>99= Don't Know | <input type="checkbox"/> |
|-----|------------------------------------------------|------------------------------------------------------------------------------------------------------------------------------------------------------------------------|--------------------------|

|     |                                                                                                       |               |                          |
|-----|-------------------------------------------------------------------------------------------------------|---------------|--------------------------|
| 618 | Have you ever given (NAME) anything solid/ semi-solid to it or any thing to drink beside breast milk? | 1=Yes<br>2=No | <input type="checkbox"/> |
|-----|-------------------------------------------------------------------------------------------------------|---------------|--------------------------|

|     |                                                                             |                                                                                                                      |                          |
|-----|-----------------------------------------------------------------------------|----------------------------------------------------------------------------------------------------------------------|--------------------------|
| 619 | At what age did you first give food/drink other than breast milk to (NAME)? | Months <input type="text"/> <input type="text"/><br>Days <input type="text"/> <input type="text"/><br>99= Don't Know | <input type="checkbox"/> |
|-----|-----------------------------------------------------------------------------|----------------------------------------------------------------------------------------------------------------------|--------------------------|

|     |                                                                                   |                                                                                                                                                                                                                                   |                          |
|-----|-----------------------------------------------------------------------------------|-----------------------------------------------------------------------------------------------------------------------------------------------------------------------------------------------------------------------------------|--------------------------|
| 620 | What else than breast milk have you ever given to (NAME)?<br>RECORD ALL RESPONSES | 1=Plain Water<br>2=Sugar Water/Honey/Juice<br>3=Baby Or Infant Formula<br>4=Cow's Or Goat's Milk<br>5=Other Liquids<br>6=Banana/Papaya/Mango<br>7=Green Leafy Vegetables<br>8=Rice, Wheat, Porridge<br>9=Meat/Fish/Eggs<br>10=Dal | <input type="checkbox"/> |
|-----|-----------------------------------------------------------------------------------|-----------------------------------------------------------------------------------------------------------------------------------------------------------------------------------------------------------------------------------|--------------------------|



|                                                 |                                                                                                                                                         |                                                                                                                                                                                                                                                                                                                                                                                                                                                                                                                                                                                                                                                                                                                                                                                                                                                                                                                                                                                                                                                                                                                                                                                                                                                                                                                                                                                                                                                           |                                               |        |       |                      |              |        |       |                      |                |        |       |                      |          |        |       |                      |         |        |       |                      |        |        |       |                      |            |        |       |                      |             |        |       |                      |           |        |       |                      |     |        |       |                      |     |        |       |                      |                    |        |       |                      |     |        |       |                      |                      |        |       |                      |                 |        |       |                      |  |
|-------------------------------------------------|---------------------------------------------------------------------------------------------------------------------------------------------------------|-----------------------------------------------------------------------------------------------------------------------------------------------------------------------------------------------------------------------------------------------------------------------------------------------------------------------------------------------------------------------------------------------------------------------------------------------------------------------------------------------------------------------------------------------------------------------------------------------------------------------------------------------------------------------------------------------------------------------------------------------------------------------------------------------------------------------------------------------------------------------------------------------------------------------------------------------------------------------------------------------------------------------------------------------------------------------------------------------------------------------------------------------------------------------------------------------------------------------------------------------------------------------------------------------------------------------------------------------------------------------------------------------------------------------------------------------------------|-----------------------------------------------|--------|-------|----------------------|--------------|--------|-------|----------------------|----------------|--------|-------|----------------------|----------|--------|-------|----------------------|---------|--------|-------|----------------------|--------|--------|-------|----------------------|------------|--------|-------|----------------------|-------------|--------|-------|----------------------|-----------|--------|-------|----------------------|-----|--------|-------|----------------------|-----|--------|-------|----------------------|--------------------|--------|-------|----------------------|-----|--------|-------|----------------------|----------------------|--------|-------|----------------------|-----------------|--------|-------|----------------------|--|
|                                                 |                                                                                                                                                         | 11=Tea<br>12=Allopathic Medicine<br>13=ORS<br>14=Kitchuri<br>15=Other (Specify)<br>16=Nothing                                                                                                                                                                                                                                                                                                                                                                                                                                                                                                                                                                                                                                                                                                                                                                                                                                                                                                                                                                                                                                                                                                                                                                                                                                                                                                                                                             |                                               |        |       |                      |              |        |       |                      |                |        |       |                      |          |        |       |                      |         |        |       |                      |        |        |       |                      |            |        |       |                      |             |        |       |                      |           |        |       |                      |     |        |       |                      |     |        |       |                      |                    |        |       |                      |     |        |       |                      |                      |        |       |                      |                 |        |       |                      |  |
| 621                                             | Why did you give foods/drinks other than breast milk to (NAME)?<br><br>RECORD ALL RESPSONSES                                                            | 1=Baby Older Than 6 Months<br>2=Breast Milk Was Not Enough<br>3=Breast Milk Has Gone Bad Due To Alga<br>4=BF Caused Loose Motion<br>5=Dai/Doctor Prohibited<br>6=Breast Milk Is Too Liquid<br>7=Baby Has Grown- Needs Extra Feed<br>8=Don't Know Benefit Of Exclusive Breastfeeding<br>9=Other (Specify)                                                                                                                                                                                                                                                                                                                                                                                                                                                                                                                                                                                                                                                                                                                                                                                                                                                                                                                                                                                                                                                                                                                                                  | <input type="text"/>                          |        |       |                      |              |        |       |                      |                |        |       |                      |          |        |       |                      |         |        |       |                      |        |        |       |                      |            |        |       |                      |             |        |       |                      |           |        |       |                      |     |        |       |                      |     |        |       |                      |                    |        |       |                      |     |        |       |                      |                      |        |       |                      |                 |        |       |                      |  |
| 622                                             | CHECK 103: BABY ALIVE?                                                                                                                                  | 1=YES <input type="checkbox"/> 2=NO <input type="checkbox"/>                                                                                                                                                                                                                                                                                                                                                                                                                                                                                                                                                                                                                                                                                                                                                                                                                                                                                                                                                                                                                                                                                                                                                                                                                                                                                                                                                                                              | 701 <input type="text"/>                      |        |       |                      |              |        |       |                      |                |        |       |                      |          |        |       |                      |         |        |       |                      |        |        |       |                      |            |        |       |                      |             |        |       |                      |           |        |       |                      |     |        |       |                      |     |        |       |                      |                    |        |       |                      |     |        |       |                      |                      |        |       |                      |                 |        |       |                      |  |
| 623                                             | How many times did (NAME) eat solid, semi-solid or soft foods other than breast milk in the last <u>24 hour</u> ?<br><br>IF 7 OR MORE TIMES, RECORD '7' | TIMES <input type="text"/>                                                                                                                                                                                                                                                                                                                                                                                                                                                                                                                                                                                                                                                                                                                                                                                                                                                                                                                                                                                                                                                                                                                                                                                                                                                                                                                                                                                                                                | <input type="text"/>                          |        |       |                      |              |        |       |                      |                |        |       |                      |          |        |       |                      |         |        |       |                      |        |        |       |                      |            |        |       |                      |             |        |       |                      |           |        |       |                      |     |        |       |                      |     |        |       |                      |                    |        |       |                      |     |        |       |                      |                      |        |       |                      |                 |        |       |                      |  |
| 624                                             | At any time yesterday (last 24 hours) was (NAME) given any of the following?                                                                            | <table border="1"> <tr> <td>Water</td> <td>1= Yes</td> <td>2= No</td> <td><input type="text"/></td> </tr> <tr> <td>Sugar /Juice</td> <td>1= Yes</td> <td>2= No</td> <td><input type="text"/></td> </tr> <tr> <td>Infant Formula</td> <td>1= Yes</td> <td>2= No</td> <td><input type="text"/></td> </tr> <tr> <td>Cow Milk</td> <td>1= Yes</td> <td>2= No</td> <td><input type="text"/></td> </tr> <tr> <td>Liquids</td> <td>1= Yes</td> <td>2= No</td> <td><input type="text"/></td> </tr> <tr> <td>Banana</td> <td>1= Yes</td> <td>2= No</td> <td><input type="text"/></td> </tr> <tr> <td>Vegetables</td> <td>1= Yes</td> <td>2= No</td> <td><input type="text"/></td> </tr> <tr> <td>Rice, Wheat</td> <td>1= Yes</td> <td>2= No</td> <td><input type="text"/></td> </tr> <tr> <td>Meat/Fish</td> <td>1= Yes</td> <td>2= No</td> <td><input type="text"/></td> </tr> <tr> <td>Dal</td> <td>1= Yes</td> <td>2= No</td> <td><input type="text"/></td> </tr> <tr> <td>Tea</td> <td>1= Yes</td> <td>2= No</td> <td><input type="text"/></td> </tr> <tr> <td>Allopathic Medicin</td> <td>1= Yes</td> <td>2= No</td> <td><input type="text"/></td> </tr> <tr> <td>ORS</td> <td>1= Yes</td> <td>2= No</td> <td><input type="text"/></td> </tr> <tr> <td>Kitchuri (Lentil Ric</td> <td>1= Yes</td> <td>2= No</td> <td><input type="text"/></td> </tr> <tr> <td>Other (Specify)</td> <td>1= Yes</td> <td>2= No</td> <td><input type="text"/></td> </tr> </table> | Water                                         | 1= Yes | 2= No | <input type="text"/> | Sugar /Juice | 1= Yes | 2= No | <input type="text"/> | Infant Formula | 1= Yes | 2= No | <input type="text"/> | Cow Milk | 1= Yes | 2= No | <input type="text"/> | Liquids | 1= Yes | 2= No | <input type="text"/> | Banana | 1= Yes | 2= No | <input type="text"/> | Vegetables | 1= Yes | 2= No | <input type="text"/> | Rice, Wheat | 1= Yes | 2= No | <input type="text"/> | Meat/Fish | 1= Yes | 2= No | <input type="text"/> | Dal | 1= Yes | 2= No | <input type="text"/> | Tea | 1= Yes | 2= No | <input type="text"/> | Allopathic Medicin | 1= Yes | 2= No | <input type="text"/> | ORS | 1= Yes | 2= No | <input type="text"/> | Kitchuri (Lentil Ric | 1= Yes | 2= No | <input type="text"/> | Other (Specify) | 1= Yes | 2= No | <input type="text"/> |  |
| Water                                           | 1= Yes                                                                                                                                                  | 2= No                                                                                                                                                                                                                                                                                                                                                                                                                                                                                                                                                                                                                                                                                                                                                                                                                                                                                                                                                                                                                                                                                                                                                                                                                                                                                                                                                                                                                                                     | <input type="text"/>                          |        |       |                      |              |        |       |                      |                |        |       |                      |          |        |       |                      |         |        |       |                      |        |        |       |                      |            |        |       |                      |             |        |       |                      |           |        |       |                      |     |        |       |                      |     |        |       |                      |                    |        |       |                      |     |        |       |                      |                      |        |       |                      |                 |        |       |                      |  |
| Sugar /Juice                                    | 1= Yes                                                                                                                                                  | 2= No                                                                                                                                                                                                                                                                                                                                                                                                                                                                                                                                                                                                                                                                                                                                                                                                                                                                                                                                                                                                                                                                                                                                                                                                                                                                                                                                                                                                                                                     | <input type="text"/>                          |        |       |                      |              |        |       |                      |                |        |       |                      |          |        |       |                      |         |        |       |                      |        |        |       |                      |            |        |       |                      |             |        |       |                      |           |        |       |                      |     |        |       |                      |     |        |       |                      |                    |        |       |                      |     |        |       |                      |                      |        |       |                      |                 |        |       |                      |  |
| Infant Formula                                  | 1= Yes                                                                                                                                                  | 2= No                                                                                                                                                                                                                                                                                                                                                                                                                                                                                                                                                                                                                                                                                                                                                                                                                                                                                                                                                                                                                                                                                                                                                                                                                                                                                                                                                                                                                                                     | <input type="text"/>                          |        |       |                      |              |        |       |                      |                |        |       |                      |          |        |       |                      |         |        |       |                      |        |        |       |                      |            |        |       |                      |             |        |       |                      |           |        |       |                      |     |        |       |                      |     |        |       |                      |                    |        |       |                      |     |        |       |                      |                      |        |       |                      |                 |        |       |                      |  |
| Cow Milk                                        | 1= Yes                                                                                                                                                  | 2= No                                                                                                                                                                                                                                                                                                                                                                                                                                                                                                                                                                                                                                                                                                                                                                                                                                                                                                                                                                                                                                                                                                                                                                                                                                                                                                                                                                                                                                                     | <input type="text"/>                          |        |       |                      |              |        |       |                      |                |        |       |                      |          |        |       |                      |         |        |       |                      |        |        |       |                      |            |        |       |                      |             |        |       |                      |           |        |       |                      |     |        |       |                      |     |        |       |                      |                    |        |       |                      |     |        |       |                      |                      |        |       |                      |                 |        |       |                      |  |
| Liquids                                         | 1= Yes                                                                                                                                                  | 2= No                                                                                                                                                                                                                                                                                                                                                                                                                                                                                                                                                                                                                                                                                                                                                                                                                                                                                                                                                                                                                                                                                                                                                                                                                                                                                                                                                                                                                                                     | <input type="text"/>                          |        |       |                      |              |        |       |                      |                |        |       |                      |          |        |       |                      |         |        |       |                      |        |        |       |                      |            |        |       |                      |             |        |       |                      |           |        |       |                      |     |        |       |                      |     |        |       |                      |                    |        |       |                      |     |        |       |                      |                      |        |       |                      |                 |        |       |                      |  |
| Banana                                          | 1= Yes                                                                                                                                                  | 2= No                                                                                                                                                                                                                                                                                                                                                                                                                                                                                                                                                                                                                                                                                                                                                                                                                                                                                                                                                                                                                                                                                                                                                                                                                                                                                                                                                                                                                                                     | <input type="text"/>                          |        |       |                      |              |        |       |                      |                |        |       |                      |          |        |       |                      |         |        |       |                      |        |        |       |                      |            |        |       |                      |             |        |       |                      |           |        |       |                      |     |        |       |                      |     |        |       |                      |                    |        |       |                      |     |        |       |                      |                      |        |       |                      |                 |        |       |                      |  |
| Vegetables                                      | 1= Yes                                                                                                                                                  | 2= No                                                                                                                                                                                                                                                                                                                                                                                                                                                                                                                                                                                                                                                                                                                                                                                                                                                                                                                                                                                                                                                                                                                                                                                                                                                                                                                                                                                                                                                     | <input type="text"/>                          |        |       |                      |              |        |       |                      |                |        |       |                      |          |        |       |                      |         |        |       |                      |        |        |       |                      |            |        |       |                      |             |        |       |                      |           |        |       |                      |     |        |       |                      |     |        |       |                      |                    |        |       |                      |     |        |       |                      |                      |        |       |                      |                 |        |       |                      |  |
| Rice, Wheat                                     | 1= Yes                                                                                                                                                  | 2= No                                                                                                                                                                                                                                                                                                                                                                                                                                                                                                                                                                                                                                                                                                                                                                                                                                                                                                                                                                                                                                                                                                                                                                                                                                                                                                                                                                                                                                                     | <input type="text"/>                          |        |       |                      |              |        |       |                      |                |        |       |                      |          |        |       |                      |         |        |       |                      |        |        |       |                      |            |        |       |                      |             |        |       |                      |           |        |       |                      |     |        |       |                      |     |        |       |                      |                    |        |       |                      |     |        |       |                      |                      |        |       |                      |                 |        |       |                      |  |
| Meat/Fish                                       | 1= Yes                                                                                                                                                  | 2= No                                                                                                                                                                                                                                                                                                                                                                                                                                                                                                                                                                                                                                                                                                                                                                                                                                                                                                                                                                                                                                                                                                                                                                                                                                                                                                                                                                                                                                                     | <input type="text"/>                          |        |       |                      |              |        |       |                      |                |        |       |                      |          |        |       |                      |         |        |       |                      |        |        |       |                      |            |        |       |                      |             |        |       |                      |           |        |       |                      |     |        |       |                      |     |        |       |                      |                    |        |       |                      |     |        |       |                      |                      |        |       |                      |                 |        |       |                      |  |
| Dal                                             | 1= Yes                                                                                                                                                  | 2= No                                                                                                                                                                                                                                                                                                                                                                                                                                                                                                                                                                                                                                                                                                                                                                                                                                                                                                                                                                                                                                                                                                                                                                                                                                                                                                                                                                                                                                                     | <input type="text"/>                          |        |       |                      |              |        |       |                      |                |        |       |                      |          |        |       |                      |         |        |       |                      |        |        |       |                      |            |        |       |                      |             |        |       |                      |           |        |       |                      |     |        |       |                      |     |        |       |                      |                    |        |       |                      |     |        |       |                      |                      |        |       |                      |                 |        |       |                      |  |
| Tea                                             | 1= Yes                                                                                                                                                  | 2= No                                                                                                                                                                                                                                                                                                                                                                                                                                                                                                                                                                                                                                                                                                                                                                                                                                                                                                                                                                                                                                                                                                                                                                                                                                                                                                                                                                                                                                                     | <input type="text"/>                          |        |       |                      |              |        |       |                      |                |        |       |                      |          |        |       |                      |         |        |       |                      |        |        |       |                      |            |        |       |                      |             |        |       |                      |           |        |       |                      |     |        |       |                      |     |        |       |                      |                    |        |       |                      |     |        |       |                      |                      |        |       |                      |                 |        |       |                      |  |
| Allopathic Medicin                              | 1= Yes                                                                                                                                                  | 2= No                                                                                                                                                                                                                                                                                                                                                                                                                                                                                                                                                                                                                                                                                                                                                                                                                                                                                                                                                                                                                                                                                                                                                                                                                                                                                                                                                                                                                                                     | <input type="text"/>                          |        |       |                      |              |        |       |                      |                |        |       |                      |          |        |       |                      |         |        |       |                      |        |        |       |                      |            |        |       |                      |             |        |       |                      |           |        |       |                      |     |        |       |                      |     |        |       |                      |                    |        |       |                      |     |        |       |                      |                      |        |       |                      |                 |        |       |                      |  |
| ORS                                             | 1= Yes                                                                                                                                                  | 2= No                                                                                                                                                                                                                                                                                                                                                                                                                                                                                                                                                                                                                                                                                                                                                                                                                                                                                                                                                                                                                                                                                                                                                                                                                                                                                                                                                                                                                                                     | <input type="text"/>                          |        |       |                      |              |        |       |                      |                |        |       |                      |          |        |       |                      |         |        |       |                      |        |        |       |                      |            |        |       |                      |             |        |       |                      |           |        |       |                      |     |        |       |                      |     |        |       |                      |                    |        |       |                      |     |        |       |                      |                      |        |       |                      |                 |        |       |                      |  |
| Kitchuri (Lentil Ric                            | 1= Yes                                                                                                                                                  | 2= No                                                                                                                                                                                                                                                                                                                                                                                                                                                                                                                                                                                                                                                                                                                                                                                                                                                                                                                                                                                                                                                                                                                                                                                                                                                                                                                                                                                                                                                     | <input type="text"/>                          |        |       |                      |              |        |       |                      |                |        |       |                      |          |        |       |                      |         |        |       |                      |        |        |       |                      |            |        |       |                      |             |        |       |                      |           |        |       |                      |     |        |       |                      |     |        |       |                      |                    |        |       |                      |     |        |       |                      |                      |        |       |                      |                 |        |       |                      |  |
| Other (Specify)                                 | 1= Yes                                                                                                                                                  | 2= No                                                                                                                                                                                                                                                                                                                                                                                                                                                                                                                                                                                                                                                                                                                                                                                                                                                                                                                                                                                                                                                                                                                                                                                                                                                                                                                                                                                                                                                     | <input type="text"/>                          |        |       |                      |              |        |       |                      |                |        |       |                      |          |        |       |                      |         |        |       |                      |        |        |       |                      |            |        |       |                      |             |        |       |                      |           |        |       |                      |     |        |       |                      |     |        |       |                      |                    |        |       |                      |     |        |       |                      |                      |        |       |                      |                 |        |       |                      |  |
| <b>SECTION 7: PERCEPTIONS OF LOCAL FACILITY</b> |                                                                                                                                                         |                                                                                                                                                                                                                                                                                                                                                                                                                                                                                                                                                                                                                                                                                                                                                                                                                                                                                                                                                                                                                                                                                                                                                                                                                                                                                                                                                                                                                                                           |                                               |        |       |                      |              |        |       |                      |                |        |       |                      |          |        |       |                      |         |        |       |                      |        |        |       |                      |            |        |       |                      |             |        |       |                      |           |        |       |                      |     |        |       |                      |     |        |       |                      |                    |        |       |                      |     |        |       |                      |                      |        |       |                      |                 |        |       |                      |  |
| 701                                             | Do you know of a health facility where woman can go if she has a health problem or give birth to a baby in your area?                                   | 1=Yes<br>2=No                                                                                                                                                                                                                                                                                                                                                                                                                                                                                                                                                                                                                                                                                                                                                                                                                                                                                                                                                                                                                                                                                                                                                                                                                                                                                                                                                                                                                                             | <input type="text"/> 801 <input type="text"/> |        |       |                      |              |        |       |                      |                |        |       |                      |          |        |       |                      |         |        |       |                      |        |        |       |                      |            |        |       |                      |             |        |       |                      |           |        |       |                      |     |        |       |                      |     |        |       |                      |                    |        |       |                      |     |        |       |                      |                      |        |       |                      |                 |        |       |                      |  |
| 702                                             | IF YES: where is that?<br><br>RECORD ALL PLACES MENTIONED.                                                                                              | 1=H & FWC<br>2=Community Clinic<br>3=UHC South<br>4=UHC North<br>5=Private Clinic Matlab<br>6=MCWC Chandpur<br>7=Private Clinic Chandpur<br>8=Chandpur District Hospital                                                                                                                                                                                                                                                                                                                                                                                                                                                                                                                                                                                                                                                                                                                                                                                                                                                                                                                                                                                                                                                                                                                                                                                                                                                                                  | <input type="text"/>                          |        |       |                      |              |        |       |                      |                |        |       |                      |          |        |       |                      |         |        |       |                      |        |        |       |                      |            |        |       |                      |             |        |       |                      |           |        |       |                      |     |        |       |                      |     |        |       |                      |                    |        |       |                      |     |        |       |                      |                      |        |       |                      |                 |        |       |                      |  |

|     |                                                                                                                                                                     |                                                                                                                                                                                                                                                                                                                                                                                                  |                          |
|-----|---------------------------------------------------------------------------------------------------------------------------------------------------------------------|--------------------------------------------------------------------------------------------------------------------------------------------------------------------------------------------------------------------------------------------------------------------------------------------------------------------------------------------------------------------------------------------------|--------------------------|
|     |                                                                                                                                                                     | <p>9=Other District Hospital</p> <p>10=Other MCWC</p> <p>11=Other Private Clinic</p> <p>12=Other UHC</p> <p>13=ICMH, Matuail, Dhaka</p> <p>14=NGO</p> <p>15=Others (Specify)</p>                                                                                                                                                                                                                 |                          |
| 703 | <p>IF MORE THAN ONE FACILITY MENTIONED: which of these health facilities is the closest to here?</p>                                                                | <p>1=H &amp; FWC</p> <p>2=Community Clinic</p> <p>3=UHC South</p> <p>4=UHC North</p> <p>5=Private Clinic Matlab</p> <p>6=MCWC Chandpur</p> <p>7=Private Clinic Chandpur</p> <p>8=Chandpur District Hospital</p> <p>9=Other District Hospital</p> <p>10=Other MCWC</p> <p>11=Other Private Clinic</p> <p>12=Other UHC</p> <p>13=ICMH, Matuail, Dhaka</p> <p>14=NGO</p> <p>15=Others (Specify)</p> | <input type="checkbox"/> |
| 704 | <p>If anything, what do you like about the care provided by the staff of the hospital/ health facility?</p> <p>PROBE: What else?</p> <p>RECORD ALL RESPONSES</p>    | <p>1=Good Behavior</p> <p>2=Availability of Medicine Supply</p> <p>3=Do Not Have To Wait</p> <p>4=Treatment Effective/ Cured</p> <p>5=Willing To Answer My Questions</p> <p>6=Affordable</p> <p>7=Clean</p> <p>8=Friendly And Communicating</p> <p>9=Other (Specify)</p> <p>10=None Mentioned</p>                                                                                                | <input type="checkbox"/> |
| 705 | <p>If anything, what do you NOT like about the care provided by the staff of the hospital/health facility?</p> <p>PROBE: What else?</p> <p>RECORD ALL RESPONSES</p> | <p>1=Bad Behavior</p> <p>2=Non-Availability Medicine</p> <p>3=Started Treatment Late</p> <p>4=Very Expensive/ Can Not Afford</p> <p>5=Not Willing to Answer my Questions</p> <p>6=Not Clean</p> <p>7=Not Friendly and Communicating</p> <p>8=Treatment not effective/ not cured</p> <p>9=Other (Specify)</p> <p>10=None Mentioned</p>                                                            | <input type="checkbox"/> |
| 706 | <p>How do you know about the care provided at this sub-centre/hospital?</p> <p>PROBE: What else?</p> <p>RECORD ALL RESPONSES</p>                                    | <p>1=Previous experience of using this facility</p> <p>2=Heard From Family Members</p> <p>3=Heard From Friends</p> <p>4=Other (Specify)</p> <p>99=Don't Know</p>                                                                                                                                                                                                                                 | <input type="checkbox"/> |

**SECTION 8: SOCIO-ECOMIC STATUS**

|                                                 |  |
|-------------------------------------------------|--|
| CID of Household Head                           |  |
| RID of Household Head                           |  |
| CID of respondent if s/he is not Household Head |  |

**Information on Land:**

|     |                                       |                      |                      |                      |                      |
|-----|---------------------------------------|----------------------|----------------------|----------------------|----------------------|
| 801 | How much land do your household own?  | <b>Decimal</b>       | <b>Kani</b>          | <b>Gonda</b>         | <b>Kora</b>          |
|     | Homestead (including ponds & ditches) | <input type="text"/> | <input type="text"/> | <input type="text"/> | <input type="text"/> |
|     | Agricultural land                     | <input type="text"/> | <input type="text"/> | <input type="text"/> | <input type="text"/> |
|     |                                       | 1 Kani=              | 1 Gonda=             | 1 Kora=              | 1 Decimal=           |

**Source of Income:**

|     |                                                                                 |                                                                                                |       |      |                      |
|-----|---------------------------------------------------------------------------------|------------------------------------------------------------------------------------------------|-------|------|----------------------|
| 802 | a. During the last 12 months what were the sources of income of your household? | 1. Agriculture (Own land)                                                                      | 1=Yes | 2=No | <input type="text"/> |
|     |                                                                                 | 2. Agriculture (Share crops)                                                                   | 1=Yes | 2=No | <input type="text"/> |
|     |                                                                                 | 3. Land/ pond mortgage/ lease/ rent (in/out)                                                   | 1=Yes | 2=No | <input type="text"/> |
|     |                                                                                 | 4. Day labourer/ Rickshaw/ Van puller                                                          | 1=Yes | 2=No | <input type="text"/> |
|     |                                                                                 | 5. Skilled labourer (driver, carpenter, plumber, electrician)                                  | 1=Yes | 2=No | <input type="text"/> |
|     |                                                                                 | 6. Selling/Catching Fish /Fish Farming                                                         | 1=Yes | 2=No | <input type="text"/> |
|     |                                                                                 | 7. Cattle/ Chicken/ Duck/ Poultry/Selling Milk                                                 | 1=Yes | 2=No | <input type="text"/> |
|     |                                                                                 | 8. Selling Handicrafts                                                                         | 1=Yes | 2=No | <input type="text"/> |
|     |                                                                                 | 9. Tailoring Work                                                                              | 1=Yes | 2=No | <input type="text"/> |
|     |                                                                                 | 10. Business (Small)                                                                           | 1=Yes | 2=No | <input type="text"/> |
|     |                                                                                 | 11. Business (MEDIUM)                                                                          | 1=Yes | 2=No | <input type="text"/> |
|     |                                                                                 | 12. Various Business (BIG)                                                                     | 1=Yes | 2=No | <input type="text"/> |
|     | b. What was the source of income?<br>SI No. <input type="text"/>                | 13. Paid Employment                                                                            | 1=Yes | 2=No | <input type="text"/> |
|     |                                                                                 | 14. Pension                                                                                    | 1=Yes | 2=No | <input type="text"/> |
|     |                                                                                 | 15. Remittance (within country)                                                                | 1=Yes | 2=No | <input type="text"/> |
|     |                                                                                 | 16. Remittance (Outside country)                                                               | 1=Yes | 2=No | <input type="text"/> |
|     |                                                                                 | 17. Food for work                                                                              | 1=Yes | 2=No | <input type="text"/> |
|     |                                                                                 | 18. Old age/ destitute (allowances)/ VGD/ Other allowances (Freedom fighter), Chairman, Member | 1=Yes | 2=No | <input type="text"/> |
|     |                                                                                 | 19. House/ Shop rent                                                                           | 1=Yes | 2=No | <input type="text"/> |
|     |                                                                                 | 20. Rent of Taxi, Tempo, Auto                                                                  | 1=Yes | 2=No | <input type="text"/> |
|     |                                                                                 | 21. Boat/ Rickshaw/ van renting out                                                            | 1=Yes | 2=No | <input type="text"/> |
|     |                                                                                 | 22. Interest Business                                                                          | 1=Yes | 2=No | <input type="text"/> |
|     |                                                                                 | 23. Journalist                                                                                 | 1=Yes | 2=No | <input type="text"/> |
|     |                                                                                 | 24. Others (specify)                                                                           | 1=Yes | 2=No | <input type="text"/> |

**Food security:**

|     |                                                                                                                                                                                                       |       |      |                      |
|-----|-------------------------------------------------------------------------------------------------------------------------------------------------------------------------------------------------------|-------|------|----------------------|
| 803 | Some households may not have food for all members three times every day for all times). Has your household been able to have food for all members for three times every day during the last one year? | 1=Yes | 2=No | <input type="text"/> |
|-----|-------------------------------------------------------------------------------------------------------------------------------------------------------------------------------------------------------|-------|------|----------------------|

**Housing Facility:**

|     |                                                         |                      |   |   |                      |
|-----|---------------------------------------------------------|----------------------|---|---|----------------------|
| 804 | a. How many rooms does your household have?             | <input type="text"/> |   |   |                      |
|     | b. Materials used for Construction of the main dwelling |                      |   |   |                      |
|     | (Write by observing)                                    |                      |   |   |                      |
|     |                                                         | <b>Items</b>         |   |   |                      |
|     |                                                         | <b>Roof</b>          |   |   |                      |
|     |                                                         | <b>Wall</b>          |   |   |                      |
|     |                                                         | <b>Floor</b>         |   |   |                      |
|     | Concrete                                                | 1                    | 1 | 1 | <input type="text"/> |
|     | Tin                                                     | 2                    | 2 | 2 | <input type="text"/> |
|     | Tin and bamboo                                          | 3                    | 3 | 3 | <input type="text"/> |
|     | Tin and wood                                            | 4                    | 4 | 4 | <input type="text"/> |
|     | Tin and others                                          | 5                    | 5 | 5 | <input type="text"/> |
|     | Bamboo and others                                       | 6                    | 6 | 6 | <input type="text"/> |

|                |   |   |   |                      |
|----------------|---|---|---|----------------------|
| Kancha (earth) | 7 | 7 | 7 | <input type="text"/> |
| Wood           | 8 | 8 | 8 | <input type="text"/> |
| Others         | 9 | 9 | 9 | <input type="text"/> |

### Commodities/ Assets

|     |                                                              |             |                                      |                      |                      |                      |                      |
|-----|--------------------------------------------------------------|-------------|--------------------------------------|----------------------|----------------------|----------------------|----------------------|
| 805 | Does your household own the following commodities or assets? | Fishing net | 1=Yes                                | 2=No                 | <input type="text"/> |                      |                      |
|     |                                                              |             | Fishing boat                         | 1=Yes                | 2=No                 | <input type="text"/> |                      |
|     |                                                              |             | Boat                                 | 1=Yes                | 2=No                 | <input type="text"/> |                      |
|     |                                                              |             | Shop (Owner)                         | 1=Yes                | 2=No                 | <input type="text"/> |                      |
|     |                                                              |             | Rickshaw/ Rickshaw van               | 1=Yes                | 2=No                 | <input type="text"/> |                      |
|     |                                                              |             | Auto rickshaw (CNG/ Battery/ Patrol) | 1=Yes                | 2=No                 | <input type="text"/> |                      |
|     |                                                              |             | Power tiller (Cultivation)           | 1=Yes                | 2=No                 | <input type="text"/> |                      |
|     |                                                              |             | Pump (irrigation / water pump)       | 1=Yes                | 2=No                 | <input type="text"/> |                      |
|     |                                                              |             | Thresher machine                     | 1=Yes                | 2=No                 | <input type="text"/> |                      |
|     |                                                              |             | Tools used for agriculture           | 1=Yes                | 2=No                 | <input type="text"/> |                      |
|     |                                                              |             | IPS                                  | 1=Yes                | 2=No                 | <input type="text"/> |                      |
|     |                                                              |             | Computer                             | 1=Yes                | 2=No                 | <input type="text"/> |                      |
|     |                                                              |             | Generator                            | 1=Yes                | 2=No                 | <input type="text"/> |                      |
|     |                                                              |             | Solar panel                          | 1=Yes                | 2=No                 | <input type="text"/> |                      |
|     |                                                              |             | Tubewell (shallow)                   | 1=Yes                | 2=No                 | <input type="text"/> |                      |
|     |                                                              |             | Tubewell (deep)                      | 1=Yes                | 2=No                 | <input type="text"/> |                      |
|     |                                                              |             | Quilt/ Blanket                       | 1=Yes                | 2=No                 | <input type="text"/> |                      |
|     |                                                              |             | Mattress                             | 1=Yes                | 2=No                 | <input type="text"/> |                      |
|     |                                                              |             | Chair/ Table                         | 1=Yes                | 2=No                 | <input type="text"/> |                      |
|     |                                                              |             | Dining table                         | 1=Yes                | 2=No                 | <input type="text"/> |                      |
|     |                                                              |             | Almirah/ Showcase                    | 1=Yes                | 2=No                 | <input type="text"/> |                      |
|     |                                                              |             | Sofa set                             | 1=Yes                | 2=No                 | <input type="text"/> |                      |
|     |                                                              |             | Television                           | 1=Yes                | 2=No                 | <input type="text"/> |                      |
|     |                                                              |             | Radio/ Tape recorder/ CD/ DVD/ VCD   | 1=Yes                | 2=No                 | <input type="text"/> |                      |
|     |                                                              |             | Land Telephone / Mobile phone        | 1=Yes                | 2=No                 | <input type="text"/> |                      |
|     |                                                              |             | Bi-cycle                             | 1=Yes                | 2=No                 | <input type="text"/> |                      |
|     |                                                              |             | Motor cycle                          | 1=Yes                | 2=No                 | <input type="text"/> |                      |
|     |                                                              |             | Refrigerator                         | 1=Yes                | 2=No                 | <input type="text"/> |                      |
|     |                                                              |             |                                      | Fan                  | 1=Yes                | 2=No                 | <input type="text"/> |
|     |                                                              |             |                                      | Sewing Machine       | 1=Yes                | 2=No                 | <input type="text"/> |
|     | Others (specify)                                             | 1=Yes       | 2=No                                 | <input type="text"/> |                      |                      |                      |

### Livestock

|     |                                         |             |                  |                      |
|-----|-----------------------------------------|-------------|------------------|----------------------|
| 806 | Does your household own livestock?      | 1=Yes       | 2=No             | <input type="text"/> |
| 807 | If yes, please mention type and number? | <b>Type</b> |                  | <b>Number</b>        |
|     |                                         | 1           | Duck and Chicken | <input type="text"/> |
|     |                                         | 2           | Goat and Sheep   | <input type="text"/> |
|     |                                         | 3           | Cow and Buffalo  | <input type="text"/> |

### Latrine

|     |                                                                                |                                        |       |                      |                      |
|-----|--------------------------------------------------------------------------------|----------------------------------------|-------|----------------------|----------------------|
| 808 | Do you have any latrine?                                                       | 1=Yes                                  | 2=No  | <input type="text"/> |                      |
| 809 | What types of latrines are used by your household?<br><br>(Write by observing) | Septic tank/ modern toilet             | 1=Yes | 2=No                 | <input type="text"/> |
|     |                                                                                | Ring/Slab but waste not drained out    | 1=Yes | 2=No                 | <input type="text"/> |
|     |                                                                                | Ring/Slab but waste drained out        | 1=Yes | 2=No                 | <input type="text"/> |
|     |                                                                                | Concrete latrine but waste drained out | 1=Yes | 2=No                 | <input type="text"/> |
|     |                                                                                | Kancha (Earth) latrine (open)          | 1=Yes | 2=No                 | <input type="text"/> |

|                                        |                                                                           |                                                 |                  |      |                          |
|----------------------------------------|---------------------------------------------------------------------------|-------------------------------------------------|------------------|------|--------------------------|
|                                        |                                                                           | Open/Bush                                       | 1=Yes            | 2=No | <input type="checkbox"/> |
|                                        |                                                                           | Others (Specify)                                |                  |      | <input type="checkbox"/> |
| <b>Drinking Water (with in 1 year)</b> |                                                                           |                                                 |                  |      |                          |
| 810                                    | Does your family have the facility of filter or pure water?               |                                                 | 1=Yes            | 2=No | <input type="checkbox"/> |
| 811                                    | What are the main sources (most commonly used) of drinking water?         | Deep Tubewell                                   | 1=Yes            | 2=No | <input type="checkbox"/> |
|                                        |                                                                           | Tubewell (Green)                                | 1=Yes            | 2=No | <input type="checkbox"/> |
|                                        |                                                                           | Tubewell (red)                                  | 1=Yes            | 2=No | <input type="checkbox"/> |
|                                        |                                                                           | Tubewell not tested yet                         | 1=Yes            | 2=No | <input type="checkbox"/> |
|                                        |                                                                           | Supply water                                    | 1=Yes            | 2=No | <input type="checkbox"/> |
|                                        |                                                                           | Rain water                                      | 1=Yes            | 2=No | <input type="checkbox"/> |
|                                        |                                                                           | Pond                                            | 1=Yes            | 2=No | <input type="checkbox"/> |
|                                        |                                                                           | River                                           | 1=Yes            | 2=No | <input type="checkbox"/> |
|                                        |                                                                           | Ditch/ canal                                    | 1=Yes            | 2=No | <input type="checkbox"/> |
|                                        |                                                                           |                                                 | Others (specify) |      |                          |
| <b>Source of Light</b>                 |                                                                           |                                                 |                  |      |                          |
| 812                                    | Main source of power/ electricity?<br><br>(Record multiple responses)     | Kerosine Oil                                    | 1=Yes            | 2=No | <input type="checkbox"/> |
|                                        |                                                                           | Electricity                                     | 1=Yes            | 2=No | <input type="checkbox"/> |
|                                        |                                                                           | Solar Panel                                     | 1=Yes            | 2=No | <input type="checkbox"/> |
|                                        |                                                                           | Generator                                       | 1=Yes            | 2=No | <input type="checkbox"/> |
|                                        |                                                                           | Others                                          | 1=Yes            | 2=No | <input type="checkbox"/> |
| <b>Fuel</b>                            |                                                                           |                                                 |                  |      |                          |
| 813                                    | Type of fuel mainly used for cooking<br><br>(Record multiple responses)   | Wood/Wood dust/Paddy Husk                       | 1=Yes            | 2=No | <input type="checkbox"/> |
|                                        |                                                                           | Leaves and straw                                | 1=Yes            | 2=No | <input type="checkbox"/> |
|                                        |                                                                           | Kerosine (stove)                                | 1=Yes            | 2=No | <input type="checkbox"/> |
|                                        |                                                                           | Gas (line)                                      | 1=Yes            | 2=No | <input type="checkbox"/> |
|                                        |                                                                           | Gas (Cylinder)                                  | 1=Yes            | 2=No | <input type="checkbox"/> |
|                                        |                                                                           | Electric (Oven/ rice cooker/ micro-oven/ grill) | 1=Yes            | 2=No | <input type="checkbox"/> |
| <b>NGO/ Committee</b>                  |                                                                           |                                                 |                  |      |                          |
| 814                                    | Is any member of your family the member of an NGO or committee ?          |                                                 | 1=Yes            | 2=No | <input type="checkbox"/> |
| 815                                    | Did any member of your family take any loans ? (Within the last 6 months) |                                                 | 1=Yes            | 2=No | <input type="checkbox"/> |
| 816                                    | If yes, do you/they regularly repay the loan?                             |                                                 | 1=Yes            | 2=No | <input type="checkbox"/> |
| <b>Bank Account</b>                    |                                                                           |                                                 |                  |      |                          |
| 817                                    | Do you/ any one of your household have an account in a bank?              |                                                 | 1=Yes            | 2=No | <input type="checkbox"/> |

End time: : :

Edited By:

Code:

Entry By:

Code:

Date: / /

Date: / /

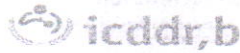

**Project: Extending a Successful Maternal, Neonatal, and Child Health Program into the Government Health System in Matlab, Bangladesh**  
**Form: Baseline Survey: Knowledge, Practice and Coverage**

|                                                                                                                                         |                                           |                                         |                                                                                   |                                     |                                     |
|-----------------------------------------------------------------------------------------------------------------------------------------|-------------------------------------------|-----------------------------------------|-----------------------------------------------------------------------------------|-------------------------------------|-------------------------------------|
| Date: <input type="text"/>                                                                                                              |                                           | Interviewers Code: <input type="text"/> |                                                                                   | Listing ID# <input type="text"/>    |                                     |
| <b>Interviewer's visit and status</b>                                                                                                   |                                           |                                         |                                                                                   |                                     |                                     |
| <b>Visit</b>                                                                                                                            | <b>1</b>                                  | <b>2</b>                                | <b>3</b>                                                                          | <b>FINAL VISIT</b>                  |                                     |
| DATE                                                                                                                                    | .....                                     | .....                                   | .....                                                                             | DAY: <input type="text"/>           | <input type="text"/>                |
|                                                                                                                                         |                                           |                                         |                                                                                   | MONTH: <input type="text"/>         | <input type="text"/>                |
|                                                                                                                                         |                                           |                                         |                                                                                   | YEAR: <input type="text"/>          | <input type="text"/>                |
| RESULT                                                                                                                                  |                                           |                                         |                                                                                   | RESULT CODE*                        |                                     |
|                                                                                                                                         |                                           |                                         |                                                                                   | INTERVIEWER'S CODE                  |                                     |
| NEXT DATE VISIT TIME                                                                                                                    |                                           |                                         |                                                                                   | TOTAL NUMBER OF VISIT               |                                     |
| * RESULT CODES                                                                                                                          |                                           |                                         | 5=Woman who has recently delivered is absent                                      |                                     |                                     |
| 1=Interview Complete                                                                                                                    |                                           |                                         | 6=Interview incomplete                                                            |                                     |                                     |
| 2=No HH member OR competent respondent were present at home at time of HH visit                                                         |                                           |                                         | 7=Others (specify) _____                                                          |                                     |                                     |
| 3=Interview cancelled                                                                                                                   |                                           |                                         |                                                                                   |                                     |                                     |
| 4=Refused to give interview                                                                                                             |                                           |                                         |                                                                                   |                                     |                                     |
| General information of respondents woman (delivered live or still birth 1 <sup>st</sup> January 2014 to 31 <sup>th</sup> December 2014) |                                           |                                         |                                                                                   |                                     |                                     |
| 1. Name of Woman:                                                                                                                       |                                           |                                         | Age: <input type="text"/> Years                                                   |                                     |                                     |
| 2. Area:                                                                                                                                | 1=HDSS <input type="text"/>               | 2=Non HDSS <input type="text"/>         | Upazila:                                                                          | 1=Matlab North <input type="text"/> | 2=Matlab South <input type="text"/> |
| 3. Block:                                                                                                                               | 1=E <input type="text"/>                  | 2=F <input type="text"/>                | 3=G <input type="text"/>                                                          | 4=N/A <input type="text"/>          |                                     |
| 4. Husband's Name:                                                                                                                      |                                           |                                         | Age: <input type="text"/> Years                                                   |                                     |                                     |
| 5. Cell Phone # (1):                                                                                                                    |                                           |                                         | 6. Cell Phone # (2):                                                              |                                     |                                     |
| 7. Bari Number: <input type="text"/>                                                                                                    | 8. Household Number: <input type="text"/> |                                         | 9. Cluster Number: <input type="text"/>                                           |                                     |                                     |
| 10. Address:                                                                                                                            | Village: _____ P.O: _____ Union: _____    |                                         | UpZ / P.S: _____ District: _____                                                  |                                     |                                     |
| 11. LMP: <input type="text"/> <input type="text"/> <input type="text"/>                                                                 |                                           |                                         | 12. Delivery Date: <input type="text"/> <input type="text"/> <input type="text"/> |                                     |                                     |
|                                                                                                                                         |                                           |                                         | DD MM YY DD MM YY                                                                 |                                     |                                     |
| 13. Pregnancy Outcome:                                                                                                                  |                                           |                                         | 1= Alive <input type="text"/>                                                     | 2=Stillbirth <input type="text"/>   |                                     |
| 14. Education Woman: <input type="text"/> yrs                                                                                           | 15. Type of education:                    |                                         | 1=Secular <input type="text"/>                                                    | 2=Moktab <input type="text"/>       | 3=NGO 4=Other <input type="text"/>  |
| 16. Education Husband: <input type="text"/> yrs                                                                                         | 17. Type of education:                    |                                         | 1=Secular <input type="text"/>                                                    | 2=Moktab <input type="text"/>       | 3=NGO 4=Other <input type="text"/>  |

Time interview started: :

| No.                                             | QUESTIONS & FILTERS                                                                               | CODING RESPONSES                                                                                | SKIP                 |
|-------------------------------------------------|---------------------------------------------------------------------------------------------------|-------------------------------------------------------------------------------------------------|----------------------|
| <b>SECTION 1: MOST RECENT BIRTH INFORMATION</b> |                                                                                                   |                                                                                                 |                      |
| ১০১                                             | প্রথম পৃষ্ঠা দেখুনঃ বাচ্চা মৃত জন্মেছিল?                                                          | ১=হ্যাঁ <input type="checkbox"/> → ২০১    ২=না <input type="checkbox"/>                         | <input type="text"/> |
| ১০২                                             | Listing তথ্য থেকে আমি জানি যে, আপনি সম্প্রতি বাচ্চা জন্ম দিয়েছেন। বাচ্চার কি নাম দেওয়া হয়েছিল? | <input type="text"/> বাচ্চা ১<br><input type="text"/> বাচ্চা ২<br><input type="text"/> বাচ্চা ৩ | <input type="text"/> |

|     |                           |                  |                  |                  |  |                          |
|-----|---------------------------|------------------|------------------|------------------|--|--------------------------|
| ১০৩ | বাচ্চাটি এখন কি অবস্থায়? | বাচ্চা ১         | বাচ্চা ২         | বাচ্চা ৩         |  | <input type="checkbox"/> |
|     |                           | ১=জীবিত<br>২=মৃত | ১=জীবিত<br>২=মৃত | ১=জীবিত<br>২=মৃত |  |                          |

## SECTION 2: PREGNANCY (গর্ভ ধারণ)

এখন আমি আপনার সঙ্গে গর্ভাবস্থা নিয়ে কথা বলতে চাই।

### জ্ঞান

|                     |                                                                                                                                            |                                        |                          |           |                          |
|---------------------|--------------------------------------------------------------------------------------------------------------------------------------------|----------------------------------------|--------------------------|-----------|--------------------------|
| ২০১                 | দয়া করে আমাকে বলুন গর্ভাবস্থায় কি কি সমস্যা হতে পারে যার জন্য চিকিৎসা দরকার হয়?<br><br>এ ছাড়া অন্য কিছু?<br><br>সকল উত্তর রেকর্ড করুন। |                                        | প্রম্ট ছাড়া             | প্রম্ট সহ |                          |
|                     |                                                                                                                                            | ১=তীব্র মাথা ব্যাথা                    | A                        | M         | <input type="checkbox"/> |
|                     |                                                                                                                                            | ২=চোখে ঝাপসা দেখা                      | B                        | N         | <input type="checkbox"/> |
|                     |                                                                                                                                            | ৩=গর্ভের বাচ্চার নড়াচড়া কম বা না করা | C                        | O         | <input type="checkbox"/> |
|                     |                                                                                                                                            | ৪=উচ্চ রক্ত চাপ                        | D                        | P         | <input type="checkbox"/> |
|                     |                                                                                                                                            | ৫=মুখে পানি আসা বা ফোলা                | E                        | Q         | <input type="checkbox"/> |
|                     |                                                                                                                                            | ৬=হাতে এবং পায়ে পানি আসা              | F                        | R         | <input type="checkbox"/> |
|                     |                                                                                                                                            | ৭=খিচুনি                               | G                        | S         | <input type="checkbox"/> |
|                     |                                                                                                                                            | ৮=যোনীপথে রক্তক্ষরণ                    | H                        | T         | <input type="checkbox"/> |
|                     |                                                                                                                                            | ৯=তলপেটে ব্যথা                         | I                        | U         | <input type="checkbox"/> |
| ১০=উপরের কোনটিই নয় | Z                                                                                                                                          | Z                                      | <input type="checkbox"/> |           |                          |

### অভ্যাস

এখন আমি আপনার সর্বশেষ গর্ভাবস্থা সম্পর্কে কথা বলব।

|     |                                                              |                            |  |                          |
|-----|--------------------------------------------------------------|----------------------------|--|--------------------------|
| ২০২ | আপনি কি সর্বশেষ গর্ভের সময় গর্ভকালীন সেবা (ANC) পেয়েছিলেন: | ১=হ্যাঁ                    |  |                          |
|     |                                                              | ২=না                       |  | ২০৬                      |
|     |                                                              | ৯=মনে নাই                  |  | ২০৬                      |
| ২০৩ | কতবার আপনি গর্ভকালীন সেবা পেয়েছিলেন?                        | কতবার <input type="text"/> |  | <input type="checkbox"/> |
|     |                                                              | 99=জানি না / মনে নেই       |  |                          |

|     |                                                                            |                                      |                            |  |                                   |  |
|-----|----------------------------------------------------------------------------|--------------------------------------|----------------------------|--|-----------------------------------|--|
| ২০৪ | কত মাসে, কোথায় এবং কে গর্ভকালীন সেবা দিয়েছিল ধারাবাহিক ভাবে উল্লেখ করুন: | 1st ANC= <input type="text"/> months | WHERE/ কোথায়              |  | WHO/ কে                           |  |
|     |                                                                            | 2nd ANC= <input type="text"/> months | 1=Home                     |  | 1= Doctors                        |  |
|     |                                                                            | 3rd ANC= <input type="text"/> months | 2=H & FWC                  |  | 2= Nurse/Midwives                 |  |
|     |                                                                            | 4th ANC= <input type="text"/> months | 3=Community Clinic         |  | 3= Family Welfare Assistant       |  |
|     |                                                                            |                                      | 4=UHC South                |  | 4= Family Welfare Visitor         |  |
|     |                                                                            |                                      | 5=UHC North                |  | 5= Traditional Birth Attendant    |  |
|     |                                                                            |                                      | 6=Private Clinic Matlab    |  | 6= Community Health Care Provider |  |
|     |                                                                            |                                      | 7=MCWC Chandpur            |  | 7= Health Assistant               |  |
|     |                                                                            |                                      | 8=Private Clinic Chandpur  |  | 8= Others (Specify) _____         |  |
|     |                                                                            |                                      | 9=Chandpur District H      |  |                                   |  |
|     |                                                                            |                                      | 10=Other District Hospital |  |                                   |  |
|     |                                                                            |                                      | 11=Other MCWC              |  |                                   |  |
|     |                                                                            |                                      | 12=Other Private Clinic    |  |                                   |  |
|     |                                                                            |                                      | 13=Other UHC               |  |                                   |  |
|     |                                                                            |                                      | 14=ICMH, Matuail, Dhaka    |  |                                   |  |
|     |                                                                            |                                      | 15=NGO                     |  |                                   |  |
|     | 16=Others (Specify) _____                                                  |                                      |                            |  |                                   |  |

|     |                                                                                                                                                                           |                      |              |           |                          |
|-----|---------------------------------------------------------------------------------------------------------------------------------------------------------------------------|----------------------|--------------|-----------|--------------------------|
| ২০৫ | এখন আমি আপনার গর্ভকালীন সেবা নিয়ে কিছু প্রশ্ন করতে চাই।<br>শেষবার যখন আপনি গর্ভবতী ছিলেন, গর্ভকালীন স্বাস্থ্য পরীক্ষার (চেক-আপ) সময় কি কি তথ্য অন্ততঃ একবার পেয়েছিলেন? |                      | প্রম্ট ছাড়া | প্রম্ট সহ |                          |
|     |                                                                                                                                                                           | ১=বুকের দুধ খাওয়ানো | A            | M         | <input type="checkbox"/> |
|     |                                                                                                                                                                           | ২=মায়ের বিপদসমূহ    | B            | N         | <input type="checkbox"/> |

|     |                                                                                                                                                        |                                                                                                                                                                                                                                                                                                                                          |                                       |                                    |                                                                                                                                                                                                                              |
|-----|--------------------------------------------------------------------------------------------------------------------------------------------------------|------------------------------------------------------------------------------------------------------------------------------------------------------------------------------------------------------------------------------------------------------------------------------------------------------------------------------------------|---------------------------------------|------------------------------------|------------------------------------------------------------------------------------------------------------------------------------------------------------------------------------------------------------------------------|
|     | সকল উত্তর লিপিবদ্ধ করুন।<br>প্রোব করুন: আর কোন তথ্য পেয়েছিলেন ?                                                                                       | ৩=প্রসব পরিকল্পনা<br>৪=স্বাস্থ্য কেন্দ্রে প্রসব<br>৫=নবজাতকের বিপদসমূহ<br>৬=নবজাতকের যত্ন<br>৭=পরিষ্কার প্রসব কিট<br>৮=অন্যান্য (নির্দিষ্ট করুনঃ)                                                                                                                                                                                        | C<br>D<br>E<br>F<br>G<br>X            | O<br>P<br>Q<br>R<br>S<br>X         | <input type="checkbox"/><br><input type="checkbox"/><br><input type="checkbox"/><br><input type="checkbox"/><br><input type="checkbox"/><br><input type="checkbox"/>                                                         |
| ২০৬ | গর্ভকালীন এবং প্রসবের পূর্বে আপনি অথবা আপনার পরিবার প্রসবের কোন পরিকল্পনা করেছিলেন কি?                                                                 | ১=হ্যাঁ<br>২=না<br>৩=মনে নাই                                                                                                                                                                                                                                                                                                             |                                       |                                    | <input type="checkbox"/><br><input type="checkbox"/><br><input type="checkbox"/>                                                                                                                                             |
| ২০৭ | আপনি অথবা আপনার পরিবার (নাম) প্রসবের জন্য কি কি পরিকল্পনা নিয়েছিলেন?<br>সকল উত্তর লিপিবদ্ধ করুন।<br>প্রোব করুন: আপনি কি আরও কোন পরিকল্পনা নিয়েছিলেন? | ১=যানবাহন নির্ধারণ<br>২=অর্থ সমস্যার কথা বলা<br>৩=ডেলিভারীর জন্য স্থান নির্ধারণ<br>৪=প্রসব সেবাদানকারী নির্ধারণ<br>৫=অন্যান্য (নির্দিষ্ট করুনঃ)                                                                                                                                                                                          | প্রম্ট ছাড়া<br>A<br>B<br>C<br>D<br>X | প্রম্ট সহ<br>M<br>N<br>O<br>P<br>X | <input type="checkbox"/><br><input type="checkbox"/><br><input type="checkbox"/><br><input type="checkbox"/><br><input type="checkbox"/><br><input type="checkbox"/>                                                         |
| ২০৮ | ২০৭ দেখুনঃ যদি প্রসব কেন্দ্র নির্ধারন করে থাকে (৩)                                                                                                     |                                                                                                                                                                                                                                                                                                                                          | ১=হ্যাঁ <input type="checkbox"/>      | ২=না <input type="checkbox"/>      | <input type="checkbox"/><br><input type="checkbox"/>                                                                                                                                                                         |
| ২০৯ | আপনি আপনার (নাম) কে কোথায় প্রসব করার পরিকল্পনা করেছিলেন:                                                                                              | 1=Home<br>2=H & FWC<br>3=Community Clinic<br>4=UHC South<br>5=UHC North<br>6=Private Clinic Matlab<br>7=MCWC Chandpur<br>8=Private Clinic Chandpur<br>9=Chandpur District Hospital<br>10=Other District Hospital<br>11=Other MCWC<br>12=Other Private Clinic<br>13=Other UHC<br>14=ICMH, Matuail, Dhaka<br>15=NGO<br>16=Others (Specify) |                                       |                                    | <input type="checkbox"/>                                                                                                                                                                                                     |
| ২১০ | ২০৭ দেখুনঃ যদি প্রসব সেবাদানকারী নির্ধারণের কথা বলা হয় ('৪')                                                                                          |                                                                                                                                                                                                                                                                                                                                          | ১=হ্যাঁ <input type="checkbox"/>      | ২=না <input type="checkbox"/>      | <input type="checkbox"/><br><input type="checkbox"/>                                                                                                                                                                         |
| ২১১ | প্রসব করানোর জন্য কাকে নির্বাচিত করেছিলেন ?                                                                                                            | 1= Doctors<br>2= Nurse/Midwives<br>3= Family Welfare Assistant<br>4= Family Welfare Visitor<br>5= Traditional Birth Attendant<br>6= Community Health Care Provider<br>7= Health Assistant<br>8= Others (Specify)                                                                                                                         |                                       |                                    | <input type="checkbox"/><br><input type="checkbox"/><br><input type="checkbox"/><br><input type="checkbox"/><br><input type="checkbox"/><br><input type="checkbox"/><br><input type="checkbox"/><br><input type="checkbox"/> |

**SECTION 3: DELIVERY**



এখন আমি বাচ্চা প্রসবের ব্যাপারে কিছু কথা বলতে চাই।

| জ্ঞান |                                                                                                                                  |                                                                                                                                                                                                                                                                                                                                                             |                                                                               |                                                                            |                                                                                                                                                                                                                                                                                                                                                                                                                                                                                                                                                                              |
|-------|----------------------------------------------------------------------------------------------------------------------------------|-------------------------------------------------------------------------------------------------------------------------------------------------------------------------------------------------------------------------------------------------------------------------------------------------------------------------------------------------------------|-------------------------------------------------------------------------------|----------------------------------------------------------------------------|------------------------------------------------------------------------------------------------------------------------------------------------------------------------------------------------------------------------------------------------------------------------------------------------------------------------------------------------------------------------------------------------------------------------------------------------------------------------------------------------------------------------------------------------------------------------------|
| ৩০১   | আপনি কি দয়া করে বলবেন বাচ্চা প্রসবের সময় কোন কোন জটিলতার জন্য চিকিৎসা দরকার হয়।<br><br>আর কিছু?<br><br>সকল উত্তর রেকর্ড করুন। | ১=অতিমাত্রায় রক্তস্রাব<br>২=দুর্গন্ধযুক্ত স্রাব<br>৩=তীব্র জ্বর<br>৪=বাচ্চার হাত বা পা আগে আসে<br>৫=বাচ্চার খারাপ অবস্থান<br>৬=বিলম্বিত প্রসব (১২ ঘন্টার বেশী)<br>৭=গর্ভফুল না পড়া বা থেকে যাওয়া<br>৮=জরায়ু ছিড়ে যাওয়া<br>৯=নাড়ী আগে বের হয়ে আসা<br>১০=গলায় নাড়ী পেচিয়ে থাকা<br>১১=খিচুনী<br>১২=প্রসবের রাস্তা ছিড়ে যাওয়া<br>১৩=উপরের একটাও না | প্রম্ট ছাড়া<br>A<br>B<br>C<br>D<br>E<br>F<br>G<br>H<br>I<br>J<br>K<br>L<br>Z | প্রম্ট সহ<br>M<br>N<br>O<br>P<br>Q<br>R<br>S<br>T<br>U<br>V<br>W<br>Y<br>Z | <input type="checkbox"/><br><input type="checkbox"/> |

অভ্যাস

আমি এখন আপনার (নাম) প্রসবের ব্যাপারে কিছু প্রশ্ন করতে চাই।

|     |                                                           |                                                                                                                                                                                                                                                                                                                                          |                                 |
|-----|-----------------------------------------------------------|------------------------------------------------------------------------------------------------------------------------------------------------------------------------------------------------------------------------------------------------------------------------------------------------------------------------------------------|---------------------------------|
| ৩০২ | আপনি কোথায় প্রসব করিয়েছিলেন?                            | 1=Home<br>2=H & FWC<br>3=Community Clinic<br>4=UHC South<br>5=UHC North<br>6=Private Clinic Matlab<br>7=MCWC Chandpur<br>8=Private Clinic Chandpur<br>9=Chandpur District Hospital<br>10=Other District Hospital<br>11=Other MCWC<br>12=Other Private Clinic<br>13=Other UHC<br>14=ICMH, Matuail, Dhaka<br>15=NGO<br>16=Others (Specify) | <input type="checkbox"/>        |
| ৩০৩ | কে বাচ্চা প্রসব করিয়েছিল?                                | 1= Doctors<br>2= Nurse/Midwives<br>3= Family Welfare Assistant<br>4= Family Welfare Visitor<br>5= Traditional Birth Attendant<br>6= Community Health Care Provider<br>7= Health Assistant<br>8=Village Doctor<br>9= Others (Specify) _____                                                                                               | <input type="checkbox"/>        |
| ৩০৪ | আর কেউ কি প্রসবে সহায়তা করেছিল?                          | ১=হ্যাঁ<br>২=না                                                                                                                                                                                                                                                                                                                          | <input type="checkbox"/><br>৩০৬ |
| ৩০৫ | যদি প্রসবে সহায়তা করে থাকে তাহলে দাই ছাড়া আর কে সাহায্য | ১=স্বাণ্ডী                                                                                                                                                                                                                                                                                                                               | <input type="checkbox"/>        |

|                              |                                                                                                                       |                                                                                                                                                                                                                                                                                                                                                                                                                                                                                                                                                     |            |              |           |                              |                |          |                         |           |               |                          |      |           |                         |          |      |           |                            |          |           |           |   |                              |   |   |  |
|------------------------------|-----------------------------------------------------------------------------------------------------------------------|-----------------------------------------------------------------------------------------------------------------------------------------------------------------------------------------------------------------------------------------------------------------------------------------------------------------------------------------------------------------------------------------------------------------------------------------------------------------------------------------------------------------------------------------------------|------------|--------------|-----------|------------------------------|----------------|----------|-------------------------|-----------|---------------|--------------------------|------|-----------|-------------------------|----------|------|-----------|----------------------------|----------|-----------|-----------|---|------------------------------|---|---|--|
|                              | করোছিলেন?<br>আর কেউ ?<br>সকল উত্তর রেকর্ড করুন।                                                                       | ২=মা<br>৩=বোন<br>৪=ননদ /জা<br>৫=শ্বশুর বাড়ীর অন্যান্য সদস্য<br>৬=বাবার বাড়ীর অন্যান্য সদস্য<br>৭=অন্য আত্মীয়স্বজন<br>৮=প্রতিবেশী<br>৯=মনে নেই                                                                                                                                                                                                                                                                                                                                                                                                    |            |              |           |                              |                |          |                         |           |               |                          |      |           |                         |          |      |           |                            |          |           |           |   |                              |   |   |  |
| ৩০৬                          | দেখুন ৩০২ঃ বাড়ীতে প্রসব                                                                                              | ১=হ্যাঁ<br>২=না                                                                                                                                                                                                                                                                                                                                                                                                                                                                                                                                     | ৩১৪        |              |           |                              |                |          |                         |           |               |                          |      |           |                         |          |      |           |                            |          |           |           |   |                              |   |   |  |
| ৩০৭                          | আপনি কি পরিস্কার ডেলিভারী কিট পেয়েছিলেন?                                                                             | ১=হ্যাঁ<br>২=না                                                                                                                                                                                                                                                                                                                                                                                                                                                                                                                                     | ৩১০        |              |           |                              |                |          |                         |           |               |                          |      |           |                         |          |      |           |                            |          |           |           |   |                              |   |   |  |
| ৩০৮                          | উত্তর হ্যাঁ হলে, আপনি কি ডেলিভারী কিট ব্যবহার করেছিলেন?                                                               | ১=হ্যাঁ<br>২=না                                                                                                                                                                                                                                                                                                                                                                                                                                                                                                                                     | ৩১০        |              |           |                              |                |          |                         |           |               |                          |      |           |                         |          |      |           |                            |          |           |           |   |                              |   |   |  |
| ৩০৯                          | ডেলিভারী কিট আপনি কি কাজে ব্যবহার করেছিলেন?<br>সকল উত্তর রেকর্ড করুন।<br>প্রোব করুন: বাকী জিনিস কি ব্যবহার করেছিলেন ? | <table border="1"> <tr> <td></td> <td>প্রম্ট ছাড়া</td> <td>প্রম্ট সহ</td> </tr> <tr> <td>১=প্রসবের জন্য প্রাস্টিক শীট</td> <td>A</td> <td>M</td> </tr> <tr> <td>২=হাত ধোয়ার জন্য সাবান</td> <td>B</td> <td>N</td> </tr> <tr> <td>৩=নাড়ী কাটার জন্য ব্রেড</td> <td>C</td> <td>O</td> </tr> <tr> <td>৪=নাড়ী বাধার জন্য সুতা</td> <td>D</td> <td>P</td> </tr> <tr> <td>৫=তুলা</td> <td>E</td> <td>Q</td> </tr> <tr> <td>৬= গজ পিচ</td> <td>F</td> <td>R</td> </tr> <tr> <td>৭=অন্যান্য (নির্দিষ্ট করুনঃ)</td> <td>X</td> <td>X</td> </tr> </table> |            | প্রম্ট ছাড়া | প্রম্ট সহ | ১=প্রসবের জন্য প্রাস্টিক শীট | A              | M        | ২=হাত ধোয়ার জন্য সাবান | B         | N             | ৩=নাড়ী কাটার জন্য ব্রেড | C    | O         | ৪=নাড়ী বাধার জন্য সুতা | D        | P    | ৫=তুলা    | E                          | Q        | ৬= গজ পিচ | F         | R | ৭=অন্যান্য (নির্দিষ্ট করুনঃ) | X | X |  |
|                              | প্রম্ট ছাড়া                                                                                                          | প্রম্ট সহ                                                                                                                                                                                                                                                                                                                                                                                                                                                                                                                                           |            |              |           |                              |                |          |                         |           |               |                          |      |           |                         |          |      |           |                            |          |           |           |   |                              |   |   |  |
| ১=প্রসবের জন্য প্রাস্টিক শীট | A                                                                                                                     | M                                                                                                                                                                                                                                                                                                                                                                                                                                                                                                                                                   |            |              |           |                              |                |          |                         |           |               |                          |      |           |                         |          |      |           |                            |          |           |           |   |                              |   |   |  |
| ২=হাত ধোয়ার জন্য সাবান      | B                                                                                                                     | N                                                                                                                                                                                                                                                                                                                                                                                                                                                                                                                                                   |            |              |           |                              |                |          |                         |           |               |                          |      |           |                         |          |      |           |                            |          |           |           |   |                              |   |   |  |
| ৩=নাড়ী কাটার জন্য ব্রেড     | C                                                                                                                     | O                                                                                                                                                                                                                                                                                                                                                                                                                                                                                                                                                   |            |              |           |                              |                |          |                         |           |               |                          |      |           |                         |          |      |           |                            |          |           |           |   |                              |   |   |  |
| ৪=নাড়ী বাধার জন্য সুতা      | D                                                                                                                     | P                                                                                                                                                                                                                                                                                                                                                                                                                                                                                                                                                   |            |              |           |                              |                |          |                         |           |               |                          |      |           |                         |          |      |           |                            |          |           |           |   |                              |   |   |  |
| ৫=তুলা                       | E                                                                                                                     | Q                                                                                                                                                                                                                                                                                                                                                                                                                                                                                                                                                   |            |              |           |                              |                |          |                         |           |               |                          |      |           |                         |          |      |           |                            |          |           |           |   |                              |   |   |  |
| ৬= গজ পিচ                    | F                                                                                                                     | R                                                                                                                                                                                                                                                                                                                                                                                                                                                                                                                                                   |            |              |           |                              |                |          |                         |           |               |                          |      |           |                         |          |      |           |                            |          |           |           |   |                              |   |   |  |
| ৭=অন্যান্য (নির্দিষ্ট করুনঃ) | X                                                                                                                     | X                                                                                                                                                                                                                                                                                                                                                                                                                                                                                                                                                   |            |              |           |                              |                |          |                         |           |               |                          |      |           |                         |          |      |           |                            |          |           |           |   |                              |   |   |  |
| ৩১০                          | নীচের কোন পদ্ধতি কি প্রসবের সময় অনুসরণ করা হয়েছিল ?                                                                 | <table border="1"> <tr> <td>রক্ত দেয়া</td> <td>১= হ্যাঁ</td> <td>২=না</td> <td>৯=জানি না</td> </tr> <tr> <td>স্যালাইন দেয়া</td> <td>১= হ্যাঁ</td> <td>২=না</td> <td>৯=জানি না</td> </tr> <tr> <td>ইনজেকশন দেয়া</td> <td>১= হ্যাঁ</td> <td>২=না</td> <td>৯=জানি না</td> </tr> <tr> <td>ইপিসিওটমি</td> <td>১= হ্যাঁ</td> <td>২=না</td> <td>৯=জানি না</td> </tr> <tr> <td>ট্যাবলেট মিজোপ্রস্টল গ্রহন</td> <td>১= হ্যাঁ</td> <td>২=না</td> <td>৯=জানি না</td> </tr> </table>                                                                         | রক্ত দেয়া | ১= হ্যাঁ     | ২=না      | ৯=জানি না                    | স্যালাইন দেয়া | ১= হ্যাঁ | ২=না                    | ৯=জানি না | ইনজেকশন দেয়া | ১= হ্যাঁ                 | ২=না | ৯=জানি না | ইপিসিওটমি               | ১= হ্যাঁ | ২=না | ৯=জানি না | ট্যাবলেট মিজোপ্রস্টল গ্রহন | ১= হ্যাঁ | ২=না      | ৯=জানি না |   |                              |   |   |  |
| রক্ত দেয়া                   | ১= হ্যাঁ                                                                                                              | ২=না                                                                                                                                                                                                                                                                                                                                                                                                                                                                                                                                                | ৯=জানি না  |              |           |                              |                |          |                         |           |               |                          |      |           |                         |          |      |           |                            |          |           |           |   |                              |   |   |  |
| স্যালাইন দেয়া               | ১= হ্যাঁ                                                                                                              | ২=না                                                                                                                                                                                                                                                                                                                                                                                                                                                                                                                                                | ৯=জানি না  |              |           |                              |                |          |                         |           |               |                          |      |           |                         |          |      |           |                            |          |           |           |   |                              |   |   |  |
| ইনজেকশন দেয়া                | ১= হ্যাঁ                                                                                                              | ২=না                                                                                                                                                                                                                                                                                                                                                                                                                                                                                                                                                | ৯=জানি না  |              |           |                              |                |          |                         |           |               |                          |      |           |                         |          |      |           |                            |          |           |           |   |                              |   |   |  |
| ইপিসিওটমি                    | ১= হ্যাঁ                                                                                                              | ২=না                                                                                                                                                                                                                                                                                                                                                                                                                                                                                                                                                | ৯=জানি না  |              |           |                              |                |          |                         |           |               |                          |      |           |                         |          |      |           |                            |          |           |           |   |                              |   |   |  |
| ট্যাবলেট মিজোপ্রস্টল গ্রহন   | ১= হ্যাঁ                                                                                                              | ২=না                                                                                                                                                                                                                                                                                                                                                                                                                                                                                                                                                | ৯=জানি না  |              |           |                              |                |          |                         |           |               |                          |      |           |                         |          |      |           |                            |          |           |           |   |                              |   |   |  |
| ৩১১                          | দেখুন ৩১০: ইনজেকশন দেয়া?                                                                                             | ১=হ্যাঁ<br>২=না                                                                                                                                                                                                                                                                                                                                                                                                                                                                                                                                     | ৩১৪        |              |           |                              |                |          |                         |           |               |                          |      |           |                         |          |      |           |                            |          |           |           |   |                              |   |   |  |
| ৩১২                          | ইনজেকশন কি জন্য দেয়া হয়েছিল ?<br>সকল উত্তর রেকর্ড করুন।                                                             | ১=তাড়াতাড়ি প্রসবের জন্য<br>২=রক্তক্ষরণ কমানোর জন্য<br>৩=খিচুনি বন্ধ করতে<br>৪=অন্যান্য (নির্দিষ্ট করুন) _____<br>৯=জানি না                                                                                                                                                                                                                                                                                                                                                                                                                        |            |              |           |                              |                |          |                         |           |               |                          |      |           |                         |          |      |           |                            |          |           |           |   |                              |   |   |  |
| ৩১৩                          | ইনজেকশন কে দিয়েছিল?                                                                                                  | 1= Doctors<br>2= Nurse/Midwives<br>3= Family Welfare Assistant<br>4= Family Welfare Visitor<br>5= Traditional Birth Attendant<br>6= Community Health Care Provider<br>7= Health Assistant<br>8= Village Doctor<br>9=Paramedic<br>10= Others (Specify)                                                                                                                                                                                                                                                                                               |            |              |           |                              |                |          |                         |           |               |                          |      |           |                         |          |      |           |                            |          |           |           |   |                              |   |   |  |
| ৩১৪                          | কিভাবে প্রসব করা আপনার পছন্দ?                                                                                         | ১=পায়খানা করার মত বসে                                                                                                                                                                                                                                                                                                                                                                                                                                                                                                                              |            |              |           |                              |                |          |                         |           |               |                          |      |           |                         |          |      |           |                            |          |           |           |   |                              |   |   |  |

|                                                                   |                                                                                                                                                                                               |                                                                                                                                                                                                                                                                                      |                                                      |
|-------------------------------------------------------------------|-----------------------------------------------------------------------------------------------------------------------------------------------------------------------------------------------|--------------------------------------------------------------------------------------------------------------------------------------------------------------------------------------------------------------------------------------------------------------------------------------|------------------------------------------------------|
|                                                                   |                                                                                                                                                                                               | ২=হাটু গেড়ে বসে<br>৩=চিৎ হয়ে শুয়ে<br>৪=দুই পা দুদিকে ছাড়িয়ে ও চিৎ হয়ে<br>৫=অন্যান্য (নির্দিষ্ট করুন) _____                                                                                                                                                                     |                                                      |
| ৩১৫                                                               | আপনি আপনার (নাম) প্রসবের সময় কি ভাবে ছিলেন?                                                                                                                                                  | ১=পায়খানা করার মত বসে<br>২=হাটু গেড়ে বসে<br>৩=চিৎ হয়ে শুয়ে<br>৪=দুই পা দুদিকে ছাড়িয়ে ও চিৎ হয়ে<br>৫=অন্যান্য (নির্দিষ্ট করুন) _____                                                                                                                                           | <input type="checkbox"/>                             |
| ৩১৬                                                               | দেখুন ৩০২: স্বাস্থ্য কেন্দ্রে / হাসপাতালে প্রসব                                                                                                                                               | ১=হ্যাঁ<br>২=না                                                                                                                                                                                                                                                                      | ৩১৯<br><input type="checkbox"/>                      |
| ৩১৭                                                               | যদি হাসপাতাল/ স্বাস্থ্যকেন্দ্রে সেবাদানকারীর কোন সেবা আপনার ভাল লেগে থাকে তাহলে তা কি ছিল?<br><br>প্রোব করুন: আর কিছু?<br><br>সকল উত্তর রেকর্ড করুন।                                          | ১=ভাল ব্যবহার<br>২=ঔষধ সরবরাহ পাওয়া<br>৩=অপেক্ষা করতে হয়নি সেবার জন্য<br>৪=চিকিৎসা কার্যকরী ছিল<br>৫=আপনার প্রশ্নের উত্তর দেওয়া<br>৬=খরচ আওতার মধ্যে<br>৭=পরিষ্কার<br>৮=বন্ধুভাবাপন্ন এবং কথা বার্তায় ভাল<br>৯=অন্যান্য (নির্দিষ্ট করুন) _____<br>১০=কিছুই উল্লেখ করেন নাই       | <input type="checkbox"/>                             |
| ৩১৮                                                               | যদি হাসপাতাল/ স্বাস্থ্যকেন্দ্রে সেবাদানকারীর কোন সেবা আপনার ভাল না লেগে থাকে তাহলে তা কি ছিল?<br><br>প্রোব করুন: আর কিছু?<br><br>সকল উত্তর রেকর্ড করুন।                                       | ১=খারাপ ব্যবহার<br>২=ঔষধ না পাওয়া<br>৩=দেরিতে চিকিৎসা শুরু করা<br>৪=খরচ অনেক বেশী/সামর্থ্যের বাইরে<br>৫=জিজ্ঞাসা করলে উত্তর না দেয়া<br>৬=অপরিষ্কার<br>৭=বন্ধুভাবাপন্ন না<br>৮=চিকিৎসা কার্যকরী ছিল না / ভাল হয়নি<br>৯=অন্যান্য (নির্দিষ্ট করুন) _____<br>১০=কিছুই উল্লেখ করেন নাই | <input type="checkbox"/>                             |
| এখন আমি আপনার শেষ গর্ভকালীন অভিজ্ঞতার ব্যাপারে কিছু কথা বলতে চাই। |                                                                                                                                                                                               |                                                                                                                                                                                                                                                                                      |                                                      |
| ৩১৯                                                               | আপনি কি আপনার (নাম) পেটে থাকা অবস্থায়, প্রসবের সময়, প্রসবের পর ২৪ ঘন্টার ভিতরে অথবা প্রসবের পর ৪২ দিন পর্যন্ত নীচের কোন সমস্যায় পড়েছিলেন।<br><br>সকল উত্তর রেকর্ড করুন।                   | PROBLEM<br><br>TIMING OF PROBLEM                                                                                                                                                                                                                                                     |                                                      |
|                                                                   | A. অতিরিক্ত রক্তক্ষরণ যা আপনার কাপড় ভিজিয়ে ফেলেছিল এবং আপনি মৃত্যুর ভয় পেয়েছিলেন?<br>B. তীব্র জ্বর<br>C. যোনী পথে দুর্গন্ধ যুক্ত স্রাব<br>D. খিচুনী<br>E. বিলম্বিত প্রসব (১২ ঘন্টার বেশী) | A. অতিরিক্ত রক্তক্ষরণ<br>হ্যাঁ .....।<br>→=গর্ভকালীন<br>2=প্রসবের সময়<br>3=প্রসবের ২৪ ঘন্টায়<br>4=প্রসবোত্তর ৪২ দিন                                                                                                                                                                | <input type="checkbox"/><br><input type="checkbox"/> |



|     |                                                                                                                             |                                                                                                                                                                                                                                                                                                                                                                  |                                 |
|-----|-----------------------------------------------------------------------------------------------------------------------------|------------------------------------------------------------------------------------------------------------------------------------------------------------------------------------------------------------------------------------------------------------------------------------------------------------------------------------------------------------------|---------------------------------|
|     |                                                                                                                             | 8=Private Clinic Chandpur<br>9=Chandpur District Hospital<br>10=Other District Hospital<br>11=Other MCWC<br>12=Other Private Clinic<br>13=Other UHC<br>14=ICMH, Matuail, Dhaka<br>15=NGO<br>16=Paramedic's Home<br>17=Village Doctor's Home<br>18=Pharmacy<br>19=Spiritual Healer Home<br>20=Kobiraj/Hakim Home<br>21=Homeopathic Chamber<br>22=Others (Specify) |                                 |
| ৩২৩ | এই চিকিৎসা / সেবা কে দিয়াছিল?<br><br>একটি উত্তর রেকর্ড করুন যার নিকট হতে মহিলা / তার পরিবার প্রথম সেবা / চিকিৎসা পেয়েছিল। | 1= Doctors<br>2= Nurse/Midwives<br>3= Family Welfare Assistant<br>4= Family Welfare Visitor<br>5= Traditional Birth Attendant<br>6= Community Health Care Provider<br>7= Health Assistant<br>8=Village Doctor/ Pharmacy<br>9=Spiritual Healer<br>10=Homeopathic<br>11=Kabiraj/Hakim<br>12=NGO worker<br>13= Others (Specify)                                     | <input type="checkbox"/>        |
| ৩২৪ | কি ধরনের সেবা / চিকিৎসা আপনি পেয়েছিলেন?<br><br>সকল উত্তর রেকর্ড করুন।                                                      | ১=ফার্মেসী থেকে ঔষধ<br>২=FWV/CHCP থেকে রেফারেল<br>৩=FWV/CHCP থেকে পরামর্শ<br>৪=পানি পড়া / দ্রব্য<br>৫=তাবিজ<br>৬=হেমিও ঔষধ<br>৭=শিরায় স্যালাইন<br>৮=ডাক্তার / নার্স এর নিকট হতে ঔষধ<br>৯=কবিরাজি/ হেকিমি ঔষধ                                                                                                                                                   | <input type="checkbox"/>        |
|     |                                                                                                                             | ১০=প্রসব তাড়াতাড়ির জন্য ইনজেকশন<br>১১=অন্যান্য (নির্দিষ্ট করুন) _____                                                                                                                                                                                                                                                                                          |                                 |
| ৩২৫ | এই সমস্যার জন্য আপনাকে কি কোথাও রেফার করা হয়েছিল?<br><br>প্রোবঃ বাড়ীতে বা বাড়ীর বাইরের সেবা?                             | ১=হ্যাঁ<br>২=না                                                                                                                                                                                                                                                                                                                                                  | <input type="checkbox"/><br>8০১ |
| ৩২৬ | আপনাকে কোথায় রেফার করা হয়েছিল?                                                                                            | 1=H & FWC<br>2=Community Clinic                                                                                                                                                                                                                                                                                                                                  | <input type="checkbox"/>        |

|     |                                                                                       |                                                                                                                                                                                                                                                                                                                                     |                          |
|-----|---------------------------------------------------------------------------------------|-------------------------------------------------------------------------------------------------------------------------------------------------------------------------------------------------------------------------------------------------------------------------------------------------------------------------------------|--------------------------|
|     |                                                                                       | 3=UHC South<br>4=UHC North<br>5=Private Clinic Matlab<br>6=MCWC Chandpur<br>7=Private Clinic Chandpur<br>8=Chandpur District Hospital<br>9=Other District Hospital<br>10=Other MCWC<br>11=Other Private Clinic<br>12=Other UHC<br>13=ICMH, Matuail, Dhaka<br>14=NGO<br>15=Others (Specify)                                          |                          |
| ৩২৭ | আপনাকে ঐ স্থানে কেন চিকিৎসা নিতে যেতে বলা হয়েছিল?<br><br>সকল উত্তর রেকর্ড করুন।      | ১=সার্জারীর যন্ত্রপাতি নাই<br>২=উচ্চ রক্ত চাপ<br>৩=উন্নত চিকিৎসার জন্য<br>৪=ডাক্তার ছিলেন না তাই<br>৫=রক্ত সঞ্চালনের ব্যবস্থা নাই<br>৬=বাচ্চা পেটের উপর অংশে ছিল<br>৭=বাচ্চার হাত, পা বা অন্য কিছু বেরিয়ে এসেছিল<br>৮=বাচ্চা ভিতরেই পায়খানা করেছিল<br>৯=জড়ায়ুর মুখ খোলে নাই<br>১০=অন্যান্য (নির্দিষ্ট করুন) _____<br>৯৯=জানি না | <input type="checkbox"/> |
| ৩২৮ | আপনি কি ঐ স্থানে গিয়েছিলেন ?                                                         | ১=হ্যাঁ<br>২=না, অন্য কোথাও গিয়েছিলাম<br>৩=কোথাও যায়নি                                                                                                                                                                                                                                                                            | <input type="checkbox"/> |
| ৩২৯ | যদি হ্যাঁ হয়, তবে কত সময় পর্যন্ত আপনাকে এই সমস্যায় সেবা নিতে অপেক্ষা করতে হয়েছিল? | <input type="text"/> ঘন্টা <input type="text"/> মিনিট                                                                                                                                                                                                                                                                               | <input type="checkbox"/> |
| ৩৩০ | যদি হ্যাঁ হয়, আপনি কেমন আছেন জানার জন্য কেউ আপনার খোঁজ নিয়েছিল কি-না?               | ১=হ্যাঁ<br>২=না<br>৯৯=জানি না                                                                                                                                                                                                                                                                                                       | <input type="checkbox"/> |
| ৩৩১ | রেফারের স্থানে আপনি কেন যাননি ?<br><br>সকল উত্তর রেকর্ড করুন।                         | ১=মা প্রয়োজন মনে করেন নি<br>২=স্বামী / পরিবার প্রয়োজন মনে করেন নি<br>৩=হাসপাতাল অনেক দূরে<br>৪=কোন যানবাহন ছিল না<br>৫=বাচ্চা দেখা শুনা করার কেউ ছিল না<br>৬=খরচ অনেক বেশী<br>৭=সেবা নিম্ন মানের<br>৮=জানতাম না কোথায় যেতে হবে<br>৯=যাবার সময় ছিল না<br>১০=টাকা ছিল না<br>১১=অন্যান্য (নির্দিষ্ট করুন) _____<br>৯৯=জানি না      | <input type="checkbox"/> |
|     |                                                                                       |                                                                                                                                                                                                                                                                                                                                     |                          |

|     |                                                                             |         |                                                   |     |
|-----|-----------------------------------------------------------------------------|---------|---------------------------------------------------|-----|
| ৩৩২ | ২০৭ দেখুনঃ যানবাহনের পরিকল্পনা করেছিলেন?                                    | ১=হ্যাঁ | ২=না                                              | ৩৩৪ |
|     |                                                                             |         | <input type="checkbox"/> <input type="checkbox"/> |     |
| ৩৩৩ | গর্ভকালীন সময় যে যানবাহন ব্যবহারের কথা ভেবেছিলেন সেটি কি ব্যবহার করেছিলেন? | ১=হ্যাঁ | ২=না                                              |     |
|     |                                                                             |         | <input type="checkbox"/>                          |     |
| ৩৩৪ | ২০৭ দেখুনঃ অর্থ সঞ্চয় করে ছিলেন?                                           | ১=হ্যাঁ | ২=না                                              | ৪০১ |
|     |                                                                             |         | <input type="checkbox"/> <input type="checkbox"/> |     |
| ৩৩৫ | আপনি কি সঞ্চিত অর্থ প্রসবের সময় ব্যবহার করেছিলেন?                          | ১=হ্যাঁ | ২=না                                              |     |
|     |                                                                             |         | <input type="checkbox"/>                          |     |

#### SECTION 4: POSTPARTUM CARE FOR MOTHER (মায়ের প্রসবোত্তর সেবা)

আমি (নাম) প্রসবের পর আপনার চিকিৎসা গ্রহণ নিয়ে কিছু প্রশ্ন করবো।

#### জ্ঞান

|     |                                                                                                                                                                                                                                      |                                                                                                                                                                                                                                |                                                                |                                                             |  |
|-----|--------------------------------------------------------------------------------------------------------------------------------------------------------------------------------------------------------------------------------------|--------------------------------------------------------------------------------------------------------------------------------------------------------------------------------------------------------------------------------|----------------------------------------------------------------|-------------------------------------------------------------|--|
| ৪০১ | দয়া করে বলবেন কি বাচ্চা প্রসবের ৪২ দিন এর ভিতর কি কি সমস্যা হতে পারে যার জন্য চিকিৎসার নেয়া দরকার হয়?<br><br>আর কিছু?<br><br>প্রোবঃ যদি জ্বর বা ব্যথার কথা বলে, জিজ্ঞেস করুন কি রকমের জ্বর বা ব্যথা<br><br>সকল উত্তর রেকর্ড করুন। | ১=অতিরিক্ত রক্তক্ষরণ<br>২=দুর্গন্ধযুক্ত শ্রাব<br>৩=তীব্র জ্বর<br>৪=স্তনের বোটা চামড়ার ভিতর ঢুকে যাওয়া<br>৫=ধনুষ্ঠংকার<br>৬=গর্ভফুল বের না হওয়া<br>৭=তীব্র পেট ব্যথা<br>৮=খিচুনি<br>৯=স্তন ফুলে যাওয়া<br>১০=উপরের কোনটাই না | প্রম্ট ছাড়া<br>A<br>B<br>C<br>D<br>E<br>F<br>G<br>H<br>I<br>X | প্রম্ট সহ<br>M<br>N<br>O<br>P<br>Q<br>R<br>S<br>T<br>U<br>X |  |
| ৪০২ | ৩০২ দেখুনঃ বাড়ীতে প্রসব?                                                                                                                                                                                                            | ১=হ্যাঁ                                                                                                                                                                                                                        | ২=না                                                           | ৪০৮                                                         |  |
|     |                                                                                                                                                                                                                                      |                                                                                                                                                                                                                                | <input type="checkbox"/> <input type="checkbox"/>              |                                                             |  |

#### অভ্যাস

প্রসবের পরের স্বাস্থ্য সম্পর্কে জানতে এখন আপনাকে কিছু প্রশ্ন করব।

|     |                                                                                                                                                      |                                                                                                                                                                                                                                                                                                         |                          |     |
|-----|------------------------------------------------------------------------------------------------------------------------------------------------------|---------------------------------------------------------------------------------------------------------------------------------------------------------------------------------------------------------------------------------------------------------------------------------------------------------|--------------------------|-----|
| ৪০৩ | আপনার (নাম) জন্মের পর আপনি কোন মেডিকেল চেক-আপ করিয়েছিলেন?                                                                                           | ১=হ্যাঁ<br>২=না                                                                                                                                                                                                                                                                                         |                          | ৫০১ |
|     |                                                                                                                                                      |                                                                                                                                                                                                                                                                                                         | <input type="checkbox"/> |     |
| ৪০৪ | আপনি ১ম চেক-আপ কোথায় করিয়েছিলেন?<br><br>যদি একের অধিক উত্তর হয় তাহলে মা'কে জিজ্ঞাসা করুন প্রথম কোথায় গিয়েছিলেন।<br><br>একটি উত্তরে গোল দাগ দিন। | 1=Home<br>2=H & FWC<br>3=Community Clinic<br>4=UHC South<br>5=UHC North<br>6=Private Clinic Matlab<br>7=MCWC Chandpur<br>8=Private Clinic Chandpur<br>9=Chandpur District Hospital<br>10=Other District Hospital<br>11=Other MCWC<br>12=Other Private Clinic<br>13=Other UHC<br>14=ICMH, Matuail, Dhaka |                          |     |

|     |                                                                                                                                                       |                                                                                                                                                                                                                                                                                                                             |                          |
|-----|-------------------------------------------------------------------------------------------------------------------------------------------------------|-----------------------------------------------------------------------------------------------------------------------------------------------------------------------------------------------------------------------------------------------------------------------------------------------------------------------------|--------------------------|
|     |                                                                                                                                                       | 15=NGO<br>16=Others (Specify)                                                                                                                                                                                                                                                                                               |                          |
| ৪০৫ | আপনার স্বাস্থ্য তখন কে পরীক্ষা করেছিল?<br><br>যদি উত্তর একাধিক হয় তাহলে জিজ্ঞাসা করুন কে প্রথম পরীক্ষা করেছিল?<br><br>একটি মাত্র উত্তরে গোল দাগ দিন। | 1= Doctors<br>2= Nurse/Midwives<br>3= Family Welfare Assistant<br>4= Family Welfare Visitor<br>5= Traditional Birth Attendant<br>6= Community Health Care Provider<br>7= Health Assistant<br>8=Village doctor/Pharmacy<br>9=Spiritual healer<br>10=Homeopathic<br>11=Kabiraj/Hakim<br>12=NGO worker<br>13= Others (Specify) | <input type="checkbox"/> |
| ৪০৬ | প্রসবের কতদিন বা সপ্তাহ পর আপনি প্রথম চেকআপ করিয়েছিলেন?<br><br>'00' রেকর্ড করুন যদি প্রসবের দিন চেক আপ করে থাকেন।                                    | দিন <input type="text"/> <input type="text"/><br>সপ্তাহ <input type="text"/> <input type="text"/><br>৯৯=জানি না/মনে নাই                                                                                                                                                                                                     | <input type="checkbox"/> |
| ৪০৭ | আপনি যে চেকআপ করিয়েছিলেন এটা কি অসুস্থতার জন্য নাকি রুটিন চেকআপ?                                                                                     | ১=অসুস্থ<br>২=রুটিন<br>৩=উভয়<br>৯=মনে নেই                                                                                                                                                                                                                                                                                  | <input type="checkbox"/> |
| ৪০৮ | প্রথম পৃষ্ঠা দেখুনঃ বাচ্চা মৃত জন্মেছিল? (২)                                                                                                          | ১=হ্যাঁ<br>২=না                                                                                                                                                                                                                                                                                                             | <input type="checkbox"/> |

### SECTION 5: IMMEDIATE NEWBORN CARE (নবজাতকের তাৎক্ষণিক পরিচর্যা)

আমি এখন আপনাকে নবজাতকের সেবা সম্পর্কে কিছু প্রশ্ন করবো :

#### জ্ঞান

|     |                                                                                                                            |                                                                                                                                                                                                                                                                                                                                                                                               |                          |
|-----|----------------------------------------------------------------------------------------------------------------------------|-----------------------------------------------------------------------------------------------------------------------------------------------------------------------------------------------------------------------------------------------------------------------------------------------------------------------------------------------------------------------------------------------|--------------------------|
| ৫০১ | কি কি গুরুতর স্বাস্থ্য সমস্যা জন্মের ৭ দিনের ভিতর হয়, যা থেকে নবজাতকের মৃত্যুর আশংকা আছে।<br><br>সকল উত্তর লিপিবদ্ধ করুন। | <p style="text-align: center;"><b>প্রম্ট ছাড়া</b></p> <p>১=শ্বাস কষ্ট অথবা তাড়াতাড়ি শ্বাস নেয়া A M</p> <p>২=কম দুধ টানা বা খাওয়া B N</p> <p>৩=চামড়া বা চোখ হলুদ হওয়া C O</p> <p>৪=নাকীতে পুঁজ থাকা বা নির্গত হওয়া D P</p> <p>৫=চোখে পুঁজ থাকা বা নির্গত হওয়া E Q</p> <p>৬=খুবই ছোট বাচ্চা F R</p> <p>৭=খিচুনী G S</p> <p>৮=কম নড়াচড়া / অজ্ঞান H T</p> <p>৯=উপরের কোনটাই না X X</p> | <input type="checkbox"/> |
| ৫০২ | আপনি কি কিছু প্রাথমিক সেবার কথা বলতে পারেন যা নবজাতককে জন্মের পর পরই দিতে হয়:<br><br>সকল উত্তর লিপিবদ্ধ করুন।             | <p style="text-align: center;"><b>প্রম্ট ছাড়া</b></p> <p>১=শরীর মোছানো এবং কাপড়ে জড়ানো A M</p> <p>২=বুকের দুধ খাওয়ানো শুরু করা B N</p> <p>৩=নাকীর যত্ন C O</p> <p>৪=চোখের যত্ন D P</p> <p>৫=অন্যান্য (নির্দিষ্ট করুন) E Q</p> <p>৯=জানি না X X</p>                                                                                                                                        | <input type="checkbox"/> |



| ৫০৩                                                                 | বুকের দুধের কি কোন উপকারিতা আছে?                                                                                                                       | ১=হ্যাঁ<br>২=না                                                                                                                                                                                                                                                                                                                                                                                                                                                                                                                                                                                                                                                                                                                                                                                                                                                                                                                                                                                                                                                                                                                                                                                                                                                                                                                                                                                                                                                                                                                                                                                                                                                                                                                                                                                                      |               | <input type="checkbox"/> |           |                          |   |   |                                                                     |   |   |                              |   |   |                       |   |   |                                                   |   |   |                                 |   |   |                       |   |   |              |              |           |                                   |   |   |                                |   |   |                                            |   |   |                                                         |   |   |                                          |   |   |                                          |   |   |                |              |           |                                                             |   |   |                         |   |   |                             |   |   |                   |   |   |  |                          |
|---------------------------------------------------------------------|--------------------------------------------------------------------------------------------------------------------------------------------------------|----------------------------------------------------------------------------------------------------------------------------------------------------------------------------------------------------------------------------------------------------------------------------------------------------------------------------------------------------------------------------------------------------------------------------------------------------------------------------------------------------------------------------------------------------------------------------------------------------------------------------------------------------------------------------------------------------------------------------------------------------------------------------------------------------------------------------------------------------------------------------------------------------------------------------------------------------------------------------------------------------------------------------------------------------------------------------------------------------------------------------------------------------------------------------------------------------------------------------------------------------------------------------------------------------------------------------------------------------------------------------------------------------------------------------------------------------------------------------------------------------------------------------------------------------------------------------------------------------------------------------------------------------------------------------------------------------------------------------------------------------------------------------------------------------------------------|---------------|--------------------------|-----------|--------------------------|---|---|---------------------------------------------------------------------|---|---|------------------------------|---|---|-----------------------|---|---|---------------------------------------------------|---|---|---------------------------------|---|---|-----------------------|---|---|--------------|--------------|-----------|-----------------------------------|---|---|--------------------------------|---|---|--------------------------------------------|---|---|---------------------------------------------------------|---|---|------------------------------------------|---|---|------------------------------------------|---|---|----------------|--------------|-----------|-------------------------------------------------------------|---|---|-------------------------|---|---|-----------------------------|---|---|-------------------|---|---|--|--------------------------|
| ৫০৪                                                                 | যদি হ্যাঁ হয়, আপনার মতে বুকের দুধ পান করার উপকারিতা কি কি?<br><br>সকল উত্তর রেকর্ড করুন।<br><br>প্রোব করুন: বাচ্চার জন্য, মায়ের জন্য ও পরিবারের জন্য | <table border="1"> <thead> <tr> <th>বাচ্চার জন্য:</th> <th>প্রম্ট ছাড়া</th> <th>প্রম্ট সহ</th> </tr> </thead> <tbody> <tr> <td>১=বুকের দুধে পুষ্টি থাকে</td> <td>A</td> <td>M</td> </tr> <tr> <td>২=৬ মাস পর্যন্ত বাচ্চার বেড়ে ওঠার জন্য সকল পুষ্টি মায়ের দুধে থাকে</td> <td>B</td> <td>N</td> </tr> <tr> <td>৩=বাচ্চা সহজেই হজম করতে পারে</td> <td>C</td> <td>O</td> </tr> <tr> <td>৪=বাচ্চার জন্য নিরাপদ</td> <td>E</td> <td>P</td> </tr> <tr> <td>৫=বুকের দুধ সংক্রামক ব্যাধি থেকে শিশুকে রক্ষা করে</td> <td>E</td> <td>Q</td> </tr> <tr> <td>৬=শিশুর ব্রেইন গঠনে সাহায্য করে</td> <td>F</td> <td>R</td> </tr> <tr> <td>৭=বাচ্চার জীবন বাচায়</td> <td>G</td> <td>S</td> </tr> </tbody> </table> <table border="1"> <thead> <tr> <th>মায়ের জন্য:</th> <th>প্রম্ট ছাড়া</th> <th>প্রম্ট সহ</th> </tr> </thead> <tbody> <tr> <td>১=মা ও শিশুর মধ্যে বন্ধন তৈরী করে</td> <td>A</td> <td>M</td> </tr> <tr> <td>২=গর্ভধারণ থেকে মাকে বিরত রাখে</td> <td>B</td> <td>N</td> </tr> <tr> <td>৩=জরায়ু দ্রুত স্বাভাবিক অবস্থায় ফিরে আসে</td> <td>C</td> <td>O</td> </tr> <tr> <td>৪=প্রসবোত্তর রক্তক্ষরণ কমিয়ে রক্ত স্ফলতাকে প্রতিহত করে</td> <td>D</td> <td>P</td> </tr> <tr> <td>৫=স্তন এবং জরায়ুর ক্যান্সার কমিয়ে দেয়</td> <td>E</td> <td>Q</td> </tr> <tr> <td>৬=বানানো লাগেনা বা সব সময় প্রস্তুত থাকে</td> <td>F</td> <td>R</td> </tr> </tbody> </table> <table border="1"> <thead> <tr> <th>পরিবারের জন্য:</th> <th>প্রম্ট ছাড়া</th> <th>প্রম্ট সহ</th> </tr> </thead> <tbody> <tr> <td>১=দুধ/খাদ্য কেনার জন্য আলাদা টাকার দরকার হয় না (খরচ কমায়)</td> <td>A</td> <td>M</td> </tr> <tr> <td>২=শিশুর চিকিৎসা খরচ কমে</td> <td>B</td> <td>N</td> </tr> <tr> <td>৩=অন্যান্য (নির্দিষ্ট করুন)</td> <td>C</td> <td>O</td> </tr> <tr> <td>৪=উপরের কোনটাই না</td> <td>D</td> <td>P</td> </tr> </tbody> </table> | বাচ্চার জন্য: | প্রম্ট ছাড়া             | প্রম্ট সহ | ১=বুকের দুধে পুষ্টি থাকে | A | M | ২=৬ মাস পর্যন্ত বাচ্চার বেড়ে ওঠার জন্য সকল পুষ্টি মায়ের দুধে থাকে | B | N | ৩=বাচ্চা সহজেই হজম করতে পারে | C | O | ৪=বাচ্চার জন্য নিরাপদ | E | P | ৫=বুকের দুধ সংক্রামক ব্যাধি থেকে শিশুকে রক্ষা করে | E | Q | ৬=শিশুর ব্রেইন গঠনে সাহায্য করে | F | R | ৭=বাচ্চার জীবন বাচায় | G | S | মায়ের জন্য: | প্রম্ট ছাড়া | প্রম্ট সহ | ১=মা ও শিশুর মধ্যে বন্ধন তৈরী করে | A | M | ২=গর্ভধারণ থেকে মাকে বিরত রাখে | B | N | ৩=জরায়ু দ্রুত স্বাভাবিক অবস্থায় ফিরে আসে | C | O | ৪=প্রসবোত্তর রক্তক্ষরণ কমিয়ে রক্ত স্ফলতাকে প্রতিহত করে | D | P | ৫=স্তন এবং জরায়ুর ক্যান্সার কমিয়ে দেয় | E | Q | ৬=বানানো লাগেনা বা সব সময় প্রস্তুত থাকে | F | R | পরিবারের জন্য: | প্রম্ট ছাড়া | প্রম্ট সহ | ১=দুধ/খাদ্য কেনার জন্য আলাদা টাকার দরকার হয় না (খরচ কমায়) | A | M | ২=শিশুর চিকিৎসা খরচ কমে | B | N | ৩=অন্যান্য (নির্দিষ্ট করুন) | C | O | ৪=উপরের কোনটাই না | D | P |  | <input type="checkbox"/> |
| বাচ্চার জন্য:                                                       | প্রম্ট ছাড়া                                                                                                                                           | প্রম্ট সহ                                                                                                                                                                                                                                                                                                                                                                                                                                                                                                                                                                                                                                                                                                                                                                                                                                                                                                                                                                                                                                                                                                                                                                                                                                                                                                                                                                                                                                                                                                                                                                                                                                                                                                                                                                                                            |               |                          |           |                          |   |   |                                                                     |   |   |                              |   |   |                       |   |   |                                                   |   |   |                                 |   |   |                       |   |   |              |              |           |                                   |   |   |                                |   |   |                                            |   |   |                                                         |   |   |                                          |   |   |                                          |   |   |                |              |           |                                                             |   |   |                         |   |   |                             |   |   |                   |   |   |  |                          |
| ১=বুকের দুধে পুষ্টি থাকে                                            | A                                                                                                                                                      | M                                                                                                                                                                                                                                                                                                                                                                                                                                                                                                                                                                                                                                                                                                                                                                                                                                                                                                                                                                                                                                                                                                                                                                                                                                                                                                                                                                                                                                                                                                                                                                                                                                                                                                                                                                                                                    |               |                          |           |                          |   |   |                                                                     |   |   |                              |   |   |                       |   |   |                                                   |   |   |                                 |   |   |                       |   |   |              |              |           |                                   |   |   |                                |   |   |                                            |   |   |                                                         |   |   |                                          |   |   |                                          |   |   |                |              |           |                                                             |   |   |                         |   |   |                             |   |   |                   |   |   |  |                          |
| ২=৬ মাস পর্যন্ত বাচ্চার বেড়ে ওঠার জন্য সকল পুষ্টি মায়ের দুধে থাকে | B                                                                                                                                                      | N                                                                                                                                                                                                                                                                                                                                                                                                                                                                                                                                                                                                                                                                                                                                                                                                                                                                                                                                                                                                                                                                                                                                                                                                                                                                                                                                                                                                                                                                                                                                                                                                                                                                                                                                                                                                                    |               |                          |           |                          |   |   |                                                                     |   |   |                              |   |   |                       |   |   |                                                   |   |   |                                 |   |   |                       |   |   |              |              |           |                                   |   |   |                                |   |   |                                            |   |   |                                                         |   |   |                                          |   |   |                                          |   |   |                |              |           |                                                             |   |   |                         |   |   |                             |   |   |                   |   |   |  |                          |
| ৩=বাচ্চা সহজেই হজম করতে পারে                                        | C                                                                                                                                                      | O                                                                                                                                                                                                                                                                                                                                                                                                                                                                                                                                                                                                                                                                                                                                                                                                                                                                                                                                                                                                                                                                                                                                                                                                                                                                                                                                                                                                                                                                                                                                                                                                                                                                                                                                                                                                                    |               |                          |           |                          |   |   |                                                                     |   |   |                              |   |   |                       |   |   |                                                   |   |   |                                 |   |   |                       |   |   |              |              |           |                                   |   |   |                                |   |   |                                            |   |   |                                                         |   |   |                                          |   |   |                                          |   |   |                |              |           |                                                             |   |   |                         |   |   |                             |   |   |                   |   |   |  |                          |
| ৪=বাচ্চার জন্য নিরাপদ                                               | E                                                                                                                                                      | P                                                                                                                                                                                                                                                                                                                                                                                                                                                                                                                                                                                                                                                                                                                                                                                                                                                                                                                                                                                                                                                                                                                                                                                                                                                                                                                                                                                                                                                                                                                                                                                                                                                                                                                                                                                                                    |               |                          |           |                          |   |   |                                                                     |   |   |                              |   |   |                       |   |   |                                                   |   |   |                                 |   |   |                       |   |   |              |              |           |                                   |   |   |                                |   |   |                                            |   |   |                                                         |   |   |                                          |   |   |                                          |   |   |                |              |           |                                                             |   |   |                         |   |   |                             |   |   |                   |   |   |  |                          |
| ৫=বুকের দুধ সংক্রামক ব্যাধি থেকে শিশুকে রক্ষা করে                   | E                                                                                                                                                      | Q                                                                                                                                                                                                                                                                                                                                                                                                                                                                                                                                                                                                                                                                                                                                                                                                                                                                                                                                                                                                                                                                                                                                                                                                                                                                                                                                                                                                                                                                                                                                                                                                                                                                                                                                                                                                                    |               |                          |           |                          |   |   |                                                                     |   |   |                              |   |   |                       |   |   |                                                   |   |   |                                 |   |   |                       |   |   |              |              |           |                                   |   |   |                                |   |   |                                            |   |   |                                                         |   |   |                                          |   |   |                                          |   |   |                |              |           |                                                             |   |   |                         |   |   |                             |   |   |                   |   |   |  |                          |
| ৬=শিশুর ব্রেইন গঠনে সাহায্য করে                                     | F                                                                                                                                                      | R                                                                                                                                                                                                                                                                                                                                                                                                                                                                                                                                                                                                                                                                                                                                                                                                                                                                                                                                                                                                                                                                                                                                                                                                                                                                                                                                                                                                                                                                                                                                                                                                                                                                                                                                                                                                                    |               |                          |           |                          |   |   |                                                                     |   |   |                              |   |   |                       |   |   |                                                   |   |   |                                 |   |   |                       |   |   |              |              |           |                                   |   |   |                                |   |   |                                            |   |   |                                                         |   |   |                                          |   |   |                                          |   |   |                |              |           |                                                             |   |   |                         |   |   |                             |   |   |                   |   |   |  |                          |
| ৭=বাচ্চার জীবন বাচায়                                               | G                                                                                                                                                      | S                                                                                                                                                                                                                                                                                                                                                                                                                                                                                                                                                                                                                                                                                                                                                                                                                                                                                                                                                                                                                                                                                                                                                                                                                                                                                                                                                                                                                                                                                                                                                                                                                                                                                                                                                                                                                    |               |                          |           |                          |   |   |                                                                     |   |   |                              |   |   |                       |   |   |                                                   |   |   |                                 |   |   |                       |   |   |              |              |           |                                   |   |   |                                |   |   |                                            |   |   |                                                         |   |   |                                          |   |   |                                          |   |   |                |              |           |                                                             |   |   |                         |   |   |                             |   |   |                   |   |   |  |                          |
| মায়ের জন্য:                                                        | প্রম্ট ছাড়া                                                                                                                                           | প্রম্ট সহ                                                                                                                                                                                                                                                                                                                                                                                                                                                                                                                                                                                                                                                                                                                                                                                                                                                                                                                                                                                                                                                                                                                                                                                                                                                                                                                                                                                                                                                                                                                                                                                                                                                                                                                                                                                                            |               |                          |           |                          |   |   |                                                                     |   |   |                              |   |   |                       |   |   |                                                   |   |   |                                 |   |   |                       |   |   |              |              |           |                                   |   |   |                                |   |   |                                            |   |   |                                                         |   |   |                                          |   |   |                                          |   |   |                |              |           |                                                             |   |   |                         |   |   |                             |   |   |                   |   |   |  |                          |
| ১=মা ও শিশুর মধ্যে বন্ধন তৈরী করে                                   | A                                                                                                                                                      | M                                                                                                                                                                                                                                                                                                                                                                                                                                                                                                                                                                                                                                                                                                                                                                                                                                                                                                                                                                                                                                                                                                                                                                                                                                                                                                                                                                                                                                                                                                                                                                                                                                                                                                                                                                                                                    |               |                          |           |                          |   |   |                                                                     |   |   |                              |   |   |                       |   |   |                                                   |   |   |                                 |   |   |                       |   |   |              |              |           |                                   |   |   |                                |   |   |                                            |   |   |                                                         |   |   |                                          |   |   |                                          |   |   |                |              |           |                                                             |   |   |                         |   |   |                             |   |   |                   |   |   |  |                          |
| ২=গর্ভধারণ থেকে মাকে বিরত রাখে                                      | B                                                                                                                                                      | N                                                                                                                                                                                                                                                                                                                                                                                                                                                                                                                                                                                                                                                                                                                                                                                                                                                                                                                                                                                                                                                                                                                                                                                                                                                                                                                                                                                                                                                                                                                                                                                                                                                                                                                                                                                                                    |               |                          |           |                          |   |   |                                                                     |   |   |                              |   |   |                       |   |   |                                                   |   |   |                                 |   |   |                       |   |   |              |              |           |                                   |   |   |                                |   |   |                                            |   |   |                                                         |   |   |                                          |   |   |                                          |   |   |                |              |           |                                                             |   |   |                         |   |   |                             |   |   |                   |   |   |  |                          |
| ৩=জরায়ু দ্রুত স্বাভাবিক অবস্থায় ফিরে আসে                          | C                                                                                                                                                      | O                                                                                                                                                                                                                                                                                                                                                                                                                                                                                                                                                                                                                                                                                                                                                                                                                                                                                                                                                                                                                                                                                                                                                                                                                                                                                                                                                                                                                                                                                                                                                                                                                                                                                                                                                                                                                    |               |                          |           |                          |   |   |                                                                     |   |   |                              |   |   |                       |   |   |                                                   |   |   |                                 |   |   |                       |   |   |              |              |           |                                   |   |   |                                |   |   |                                            |   |   |                                                         |   |   |                                          |   |   |                                          |   |   |                |              |           |                                                             |   |   |                         |   |   |                             |   |   |                   |   |   |  |                          |
| ৪=প্রসবোত্তর রক্তক্ষরণ কমিয়ে রক্ত স্ফলতাকে প্রতিহত করে             | D                                                                                                                                                      | P                                                                                                                                                                                                                                                                                                                                                                                                                                                                                                                                                                                                                                                                                                                                                                                                                                                                                                                                                                                                                                                                                                                                                                                                                                                                                                                                                                                                                                                                                                                                                                                                                                                                                                                                                                                                                    |               |                          |           |                          |   |   |                                                                     |   |   |                              |   |   |                       |   |   |                                                   |   |   |                                 |   |   |                       |   |   |              |              |           |                                   |   |   |                                |   |   |                                            |   |   |                                                         |   |   |                                          |   |   |                                          |   |   |                |              |           |                                                             |   |   |                         |   |   |                             |   |   |                   |   |   |  |                          |
| ৫=স্তন এবং জরায়ুর ক্যান্সার কমিয়ে দেয়                            | E                                                                                                                                                      | Q                                                                                                                                                                                                                                                                                                                                                                                                                                                                                                                                                                                                                                                                                                                                                                                                                                                                                                                                                                                                                                                                                                                                                                                                                                                                                                                                                                                                                                                                                                                                                                                                                                                                                                                                                                                                                    |               |                          |           |                          |   |   |                                                                     |   |   |                              |   |   |                       |   |   |                                                   |   |   |                                 |   |   |                       |   |   |              |              |           |                                   |   |   |                                |   |   |                                            |   |   |                                                         |   |   |                                          |   |   |                                          |   |   |                |              |           |                                                             |   |   |                         |   |   |                             |   |   |                   |   |   |  |                          |
| ৬=বানানো লাগেনা বা সব সময় প্রস্তুত থাকে                            | F                                                                                                                                                      | R                                                                                                                                                                                                                                                                                                                                                                                                                                                                                                                                                                                                                                                                                                                                                                                                                                                                                                                                                                                                                                                                                                                                                                                                                                                                                                                                                                                                                                                                                                                                                                                                                                                                                                                                                                                                                    |               |                          |           |                          |   |   |                                                                     |   |   |                              |   |   |                       |   |   |                                                   |   |   |                                 |   |   |                       |   |   |              |              |           |                                   |   |   |                                |   |   |                                            |   |   |                                                         |   |   |                                          |   |   |                                          |   |   |                |              |           |                                                             |   |   |                         |   |   |                             |   |   |                   |   |   |  |                          |
| পরিবারের জন্য:                                                      | প্রম্ট ছাড়া                                                                                                                                           | প্রম্ট সহ                                                                                                                                                                                                                                                                                                                                                                                                                                                                                                                                                                                                                                                                                                                                                                                                                                                                                                                                                                                                                                                                                                                                                                                                                                                                                                                                                                                                                                                                                                                                                                                                                                                                                                                                                                                                            |               |                          |           |                          |   |   |                                                                     |   |   |                              |   |   |                       |   |   |                                                   |   |   |                                 |   |   |                       |   |   |              |              |           |                                   |   |   |                                |   |   |                                            |   |   |                                                         |   |   |                                          |   |   |                                          |   |   |                |              |           |                                                             |   |   |                         |   |   |                             |   |   |                   |   |   |  |                          |
| ১=দুধ/খাদ্য কেনার জন্য আলাদা টাকার দরকার হয় না (খরচ কমায়)         | A                                                                                                                                                      | M                                                                                                                                                                                                                                                                                                                                                                                                                                                                                                                                                                                                                                                                                                                                                                                                                                                                                                                                                                                                                                                                                                                                                                                                                                                                                                                                                                                                                                                                                                                                                                                                                                                                                                                                                                                                                    |               |                          |           |                          |   |   |                                                                     |   |   |                              |   |   |                       |   |   |                                                   |   |   |                                 |   |   |                       |   |   |              |              |           |                                   |   |   |                                |   |   |                                            |   |   |                                                         |   |   |                                          |   |   |                                          |   |   |                |              |           |                                                             |   |   |                         |   |   |                             |   |   |                   |   |   |  |                          |
| ২=শিশুর চিকিৎসা খরচ কমে                                             | B                                                                                                                                                      | N                                                                                                                                                                                                                                                                                                                                                                                                                                                                                                                                                                                                                                                                                                                                                                                                                                                                                                                                                                                                                                                                                                                                                                                                                                                                                                                                                                                                                                                                                                                                                                                                                                                                                                                                                                                                                    |               |                          |           |                          |   |   |                                                                     |   |   |                              |   |   |                       |   |   |                                                   |   |   |                                 |   |   |                       |   |   |              |              |           |                                   |   |   |                                |   |   |                                            |   |   |                                                         |   |   |                                          |   |   |                                          |   |   |                |              |           |                                                             |   |   |                         |   |   |                             |   |   |                   |   |   |  |                          |
| ৩=অন্যান্য (নির্দিষ্ট করুন)                                         | C                                                                                                                                                      | O                                                                                                                                                                                                                                                                                                                                                                                                                                                                                                                                                                                                                                                                                                                                                                                                                                                                                                                                                                                                                                                                                                                                                                                                                                                                                                                                                                                                                                                                                                                                                                                                                                                                                                                                                                                                                    |               |                          |           |                          |   |   |                                                                     |   |   |                              |   |   |                       |   |   |                                                   |   |   |                                 |   |   |                       |   |   |              |              |           |                                   |   |   |                                |   |   |                                            |   |   |                                                         |   |   |                                          |   |   |                                          |   |   |                |              |           |                                                             |   |   |                         |   |   |                             |   |   |                   |   |   |  |                          |
| ৪=উপরের কোনটাই না                                                   | D                                                                                                                                                      | P                                                                                                                                                                                                                                                                                                                                                                                                                                                                                                                                                                                                                                                                                                                                                                                                                                                                                                                                                                                                                                                                                                                                                                                                                                                                                                                                                                                                                                                                                                                                                                                                                                                                                                                                                                                                                    |               |                          |           |                          |   |   |                                                                     |   |   |                              |   |   |                       |   |   |                                                   |   |   |                                 |   |   |                       |   |   |              |              |           |                                   |   |   |                                |   |   |                                            |   |   |                                                         |   |   |                                          |   |   |                                          |   |   |                |              |           |                                                             |   |   |                         |   |   |                             |   |   |                   |   |   |  |                          |
| <b>অভ্যাস</b>                                                       |                                                                                                                                                        |                                                                                                                                                                                                                                                                                                                                                                                                                                                                                                                                                                                                                                                                                                                                                                                                                                                                                                                                                                                                                                                                                                                                                                                                                                                                                                                                                                                                                                                                                                                                                                                                                                                                                                                                                                                                                      |               |                          |           |                          |   |   |                                                                     |   |   |                              |   |   |                       |   |   |                                                   |   |   |                                 |   |   |                       |   |   |              |              |           |                                   |   |   |                                |   |   |                                            |   |   |                                                         |   |   |                                          |   |   |                                          |   |   |                |              |           |                                                             |   |   |                         |   |   |                             |   |   |                   |   |   |  |                          |
| ৫০৫                                                                 | আপনার (নাম) জন্মের পর পরই প্রথম কি খাওয়ানো হয়েছিল?<br><br>প্রোব করুন: প্রথমেই কি করেছিল - ১টি মাত্র উত্তরে গোল দাগ দিন।                              | ১=শাল দুধ<br>২=শুধু পানি<br>৩=মিছরী/ চিনি/ গ্লুকোজ পানি<br>৪=মধু<br>৫=সরিষার তেল<br>৬=বুকের দুধ ছাড়া অন্য দুধ<br>৭=অন্য তরল<br>৮=অন্যান্য (নির্দিষ্ট করুন)                                                                                                                                                                                                                                                                                                                                                                                                                                                                                                                                                                                                                                                                                                                                                                                                                                                                                                                                                                                                                                                                                                                                                                                                                                                                                                                                                                                                                                                                                                                                                                                                                                                          |               | <input type="checkbox"/> |           |                          |   |   |                                                                     |   |   |                              |   |   |                       |   |   |                                                   |   |   |                                 |   |   |                       |   |   |              |              |           |                                   |   |   |                                |   |   |                                            |   |   |                                                         |   |   |                                          |   |   |                                          |   |   |                |              |           |                                                             |   |   |                         |   |   |                             |   |   |                   |   |   |  |                          |
| ৫০৬                                                                 | (নাম) কে শালদুধ দেয়া হয়েছিল কি?                                                                                                                      | ১=হ্যাঁ<br>২=না                                                                                                                                                                                                                                                                                                                                                                                                                                                                                                                                                                                                                                                                                                                                                                                                                                                                                                                                                                                                                                                                                                                                                                                                                                                                                                                                                                                                                                                                                                                                                                                                                                                                                                                                                                                                      |               | <input type="checkbox"/> |           |                          |   |   |                                                                     |   |   |                              |   |   |                       |   |   |                                                   |   |   |                                 |   |   |                       |   |   |              |              |           |                                   |   |   |                                |   |   |                                            |   |   |                                                         |   |   |                                          |   |   |                                          |   |   |                |              |           |                                                             |   |   |                         |   |   |                             |   |   |                   |   |   |  |                          |
| ৫০৭                                                                 | আপনার (নাম) জন্মের কতক্ষণ পর বুকের দুধ খাওয়া শুরু করেছিল?                                                                                             | মিনিট <input type="text"/> <input type="text"/> <input type="text"/><br>ঘন্টা <input type="text"/> <input type="text"/> <input type="text"/><br>দিন <input type="text"/> <input type="text"/> <input type="text"/><br>৯৮=কখনোই বুকের দুধ খায়নি<br>৯৯=জানি না                                                                                                                                                                                                                                                                                                                                                                                                                                                                                                                                                                                                                                                                                                                                                                                                                                                                                                                                                                                                                                                                                                                                                                                                                                                                                                                                                                                                                                                                                                                                                        |               | <input type="checkbox"/> |           |                          |   |   |                                                                     |   |   |                              |   |   |                       |   |   |                                                   |   |   |                                 |   |   |                       |   |   |              |              |           |                                   |   |   |                                |   |   |                                            |   |   |                                                         |   |   |                                          |   |   |                                          |   |   |                |              |           |                                                             |   |   |                         |   |   |                             |   |   |                   |   |   |  |                          |
| ৫০৮                                                                 | (নাম) কে বুকের দুধ দেয়ার পূর্বে আপনি কি কোন ধরনের দুধ ফেলে দিয়েছিলেন?                                                                                | ১=হ্যাঁ<br>২=না                                                                                                                                                                                                                                                                                                                                                                                                                                                                                                                                                                                                                                                                                                                                                                                                                                                                                                                                                                                                                                                                                                                                                                                                                                                                                                                                                                                                                                                                                                                                                                                                                                                                                                                                                                                                      |               | <input type="checkbox"/> |           |                          |   |   |                                                                     |   |   |                              |   |   |                       |   |   |                                                   |   |   |                                 |   |   |                       |   |   |              |              |           |                                   |   |   |                                |   |   |                                            |   |   |                                                         |   |   |                                          |   |   |                                          |   |   |                |              |           |                                                             |   |   |                         |   |   |                             |   |   |                   |   |   |  |                          |
| ৫০৯                                                                 | আপনার (নাম) জন্মের সাথে সাথেই কি কেঁদেছিল?                                                                                                             | ১=হ্যাঁ<br>২=না                                                                                                                                                                                                                                                                                                                                                                                                                                                                                                                                                                                                                                                                                                                                                                                                                                                                                                                                                                                                                                                                                                                                                                                                                                                                                                                                                                                                                                                                                                                                                                                                                                                                                                                                                                                                      |               | <input type="checkbox"/> |           |                          |   |   |                                                                     |   |   |                              |   |   |                       |   |   |                                                   |   |   |                                 |   |   |                       |   |   |              |              |           |                                   |   |   |                                |   |   |                                            |   |   |                                                         |   |   |                                          |   |   |                                          |   |   |                |              |           |                                                             |   |   |                         |   |   |                             |   |   |                   |   |   |  |                          |

|     |                                                                                                     |                                                                                                                                                                                                                                                                |                                 |
|-----|-----------------------------------------------------------------------------------------------------|----------------------------------------------------------------------------------------------------------------------------------------------------------------------------------------------------------------------------------------------------------------|---------------------------------|
|     |                                                                                                     | ৯=মনে নেই                                                                                                                                                                                                                                                      |                                 |
| ৫১০ | আপনার (নাম) জন্মের পর কাঁদানো বা শ্বাস নেয়ার জন্য কোন সাহায্যের প্রয়োজন হয়েছিল?                  | ১=হ্যাঁ<br>২=না<br>৯=মনে নেই                                                                                                                                                                                                                                   | <input type="checkbox"/><br>৫১২ |
| ৫১১ | কাঁদানোর বা শ্বাস নেয়ার জন্য কি করা হয়েছিল?<br><br>(উত্তর বলবেন না)<br><br>সকল উত্তর রেকর্ড করুন। | ১=কোন উত্তর নাই<br>২=শিশুকে শুকানো হয়েছিল<br>৩=পিঠ ঘষা হয়েছিল<br>৪=পায়ে ঘষা দেয়া হয়েছিল<br>৫=মুখ থেকে মুখে শ্বাস দেয়া হয়েছিল<br>৬=নাড়ি গরম করা হয়েছিল<br>৭=শিশুকে চাপড়ানো হয়েছিল<br>৮=শিশুকে উপর-নীচ করে ধরা হয়েছিল<br>৯=অন্যান্য (নির্দিষ্ট করুন) | <input type="checkbox"/>        |
| ৫১২ | নাড়ী কাটার জন্য কি ব্যবহার করা হয়েছিল?                                                            | ১=সাধারণ ব্রেড<br>২=কিটের সাথে দেয়া জীবাণু মুক্ত ব্রেড<br>৩=বাসের চটা/লেইল<br>৪=কাঁচি<br>৫=জীবাণুমুক্ত সার্জিক্যাল ব্রেড<br>৬=স্বাস্থ্যকেন্দ্রে/হাসপাতালে প্রসব<br>৭=অন্যান্য (নির্দিষ্ট করুন)<br>৯=মনে নাই/ জানি না                                          | <input type="checkbox"/><br>৫১৪ |
| ৫১৩ | যা দ্বারা নাড়ী কাটা হয়েছিল তা কি পানিতে ফুটানো বা জীবাণুমুক্ত করা হয়েছিল?                        | ১=হ্যাঁ<br>২=না<br>৯=মনে নেই                                                                                                                                                                                                                                   | <input type="checkbox"/>        |
| ৫১৪ | নাড়ী বাধার জন্য কি ব্যবহার করা হয়েছিল?                                                            | ১=বার্থ কিট থেকে জীবাণু মুক্ত সূতা<br>২=সূতি সূতা<br>৩=নাইলন সূতা<br>৪=জালের সূতা<br>৫=হাসপাতাল/স্বাস্থ্যকেন্দ্রে প্রসব<br>৬=অন্যান্য (নির্দিষ্ট করুন)<br>৯=মনে নেই                                                                                            | <input type="checkbox"/><br>৫১৬ |
| ৫১৫ | ব্যবহৃত সূতা কি ফুটানো হয়েছিল ?                                                                    | ১=হ্যাঁ<br>২=না<br>৯=মনে নাই                                                                                                                                                                                                                                   | <input type="checkbox"/>        |
| ৫১৬ | নাড়ী কাটা এবং বাধার পর কি কোন কিছু লাগানো হয়েছিল?                                                 | ১=হ্যাঁ<br>২=না<br>৯=মনে নেই                                                                                                                                                                                                                                   | <input type="checkbox"/><br>৫১৮ |
| ৫১৭ | নাড়ী কাটার সাথে সাথে কি লাগানো হয়েছিল ?<br><br>সকল উত্তর রেকর্ড করুন।                             | ১=এ্যান্টিবায়োটিক (পাউডার/মলম)<br>২=স্যাভলন<br>৩=ডেটল<br>৪=এলকোহল/স্পিরিট<br>৫=রসুন সহ সরিষার তৈল<br>৬=চাল চিবানো<br>৭=হলুদ                                                                                                                                   | <input type="checkbox"/>        |

|     |                                                  |                                                                                                                               |                          |
|-----|--------------------------------------------------|-------------------------------------------------------------------------------------------------------------------------------|--------------------------|
|     |                                                  | ৮=আদার রস<br>৯=সিঁদুর<br>১০=বরিক পাউডার<br>১১=জেনশন ভায়োলেট<br>১২=টেলকম পাউডার<br>১৩=অন্যান্য (নির্দিষ্ট করুন)<br>৯৯=জানি না |                          |
| ৫১৮ | জন্মের পর প্রথম (নাম) কে কখন গোসল দেয়া হয়েছিল? | ১= জন্মের ২৪ ঘণ্টার মধ্যে<br>২=১ম দিন (২৪ ঘণ্টা পর )<br>৩=২য় দিন<br>৪=৩য় দিন<br>৫=তারপর<br>৯=মনে নাই                        | <input type="checkbox"/> |

### SECTION 6: NEWBORN CARE: FIRST MONTH & BREAST FEEDING

আমি এখন আপনার (নাম) জন্মের প্রথম মাসে কি ঘটেছিল তা জানার জন্য জিজ্ঞাসা করবো।

|     |                                                                                                                         |                                                                                                                                                                                                                                                                                |                                 |
|-----|-------------------------------------------------------------------------------------------------------------------------|--------------------------------------------------------------------------------------------------------------------------------------------------------------------------------------------------------------------------------------------------------------------------------|---------------------------------|
| ৬০১ | প্রসবের পর নাড়ী পড়ে যাবার আগে তাতে কি লাগানো হয়েছিল?<br><br>আর কিছ ?<br><br>সকল উত্তর রেকর্ড করুন।                   | ১=কিছুই না<br>২=এ্যান্টিবায়োটিক (পাউডার/মলম)<br>৩=স্যান্ডলন<br>৪=ডেটল<br>৫=এলকোহল/স্পিরিট<br>৬=রসুন সহ সরিষার তৈল<br>৭=চাল চিবানো<br>৮=হলুদ<br>৯=আদার রস<br>১০=সিঁদুর<br>১১=বরিক পাউডার<br>১২=জেনশন ভায়োলেট<br>১৩=টেলকম পাউডার<br>১৪=অন্যান্য (নির্দিষ্ট করুন)<br>৯৯=জানি না | <input type="checkbox"/>        |
| ৬০২ | আপনার (নাম) জন্মের পর কোন স্বাস্থ্য কর্মী কি তার স্বাস্থ্য চেক-আপ করেছিল?                                               | ১=হ্যাঁ<br>২=না<br>৯=মনে নেই                                                                                                                                                                                                                                                   | <input type="checkbox"/><br>৬০৭ |
| ৬০৩ | আপনার শিশু জন্মের কতদিন বা সপ্তাহ পর প্রথম চেক আপ করিয়েছিলেন?<br><br>'০০' রেকর্ড করুন যদি চেক আপ প্রসবের দিনই করা হয়। | দিন : প্রসবের পর <input type="text"/> <input type="text"/><br>সপ্তাহ : প্রসবের পর <input type="text"/> <input type="text"/><br>৯৯=জানি না/মনে নাই                                                                                                                              | <input type="checkbox"/>        |
| ৬০৪ | কে সেই সময় আপনার (নাম) কে চেকআপ করেছিলেন?                                                                              | 1= Doctors<br>2= Nurse/Midwives<br>3= Family Welfare Assistant<br>4= Family Welfare Visitor<br>5= Traditional Birth Attendant<br>6= Community Health Care Provider<br>7= Health Assistant                                                                                      | <input type="checkbox"/>        |

|     |                                                                                                                                                                              |                  |                                                                                                                                                                                                                                                                                                                                          |                          |           |                          |
|-----|------------------------------------------------------------------------------------------------------------------------------------------------------------------------------|------------------|------------------------------------------------------------------------------------------------------------------------------------------------------------------------------------------------------------------------------------------------------------------------------------------------------------------------------------------|--------------------------|-----------|--------------------------|
|     |                                                                                                                                                                              |                  | 8=Village doctor<br>9=Spiritual healer<br>10=Homeopathic<br>11=Kabiraj/Hakim<br>12=NGO worker<br>13= Others (Specify)                                                                                                                                                                                                                    |                          |           |                          |
| ৬০৫ | প্রথম চেকআপ কোথায় হয়েছিল ?                                                                                                                                                 |                  | 1=Home<br>2=H & FWC<br>3=Community Clinic<br>4=UHC South<br>5=UHC North<br>6=Private Clinic Matlab<br>7=MCWC Chandpur<br>8=Private Clinic Chandpur<br>9=Chandpur District Hospital<br>10=Other District Hospital<br>11=Other MCWC<br>12=Other Private Clinic<br>13=Other UHC<br>14=ICMH, Matuail, Dhaka<br>15=NGO<br>16=Others (Specify) | <input type="checkbox"/> |           |                          |
| ৬০৬ | চেক-আপ করিয়েছিলেন কি বাচ্চার অসুস্থতার জন্য না কি রুটিন চেক-আপ?                                                                                                             |                  | ১=অসুস্থ<br>২=রুটিন<br>৩=উভয়<br>৯=মনে নাই                                                                                                                                                                                                                                                                                               | <input type="checkbox"/> |           |                          |
| ৬০৭ | জন্মের ১ মাসের ভিতর আপনার (নামের) নীচের কোন সমস্যা হয়েছিল কি?                                                                                                               | জ্বর             | ১=হ্যাঁ                                                                                                                                                                                                                                                                                                                                  | ২=না                     | ৯=জানি না | <input type="checkbox"/> |
|     |                                                                                                                                                                              | শ্বাস কষ্ট       | ১=হ্যাঁ                                                                                                                                                                                                                                                                                                                                  | ২=না                     | ৯=জানি না | <input type="checkbox"/> |
|     |                                                                                                                                                                              | জন্ডিস           | ১=হ্যাঁ                                                                                                                                                                                                                                                                                                                                  | ২=না                     | ৯=জানি না | <input type="checkbox"/> |
|     |                                                                                                                                                                              | ডায়রিয়া        | ১=হ্যাঁ                                                                                                                                                                                                                                                                                                                                  | ২=না                     | ৯=জানি না | <input type="checkbox"/> |
|     |                                                                                                                                                                              | নাভির সমস্যা     | ১=হ্যাঁ                                                                                                                                                                                                                                                                                                                                  | ২=না                     | ৯=জানি না | <input type="checkbox"/> |
|     |                                                                                                                                                                              | খিচুনী           | ১=হ্যাঁ                                                                                                                                                                                                                                                                                                                                  | ২=না                     | ৯=জানি না | <input type="checkbox"/> |
|     |                                                                                                                                                                              | খাওয়ানোর সমস্যা | ১=হ্যাঁ                                                                                                                                                                                                                                                                                                                                  | ২=না                     | ৯=জানি না | <input type="checkbox"/> |
| ৬০৮ | ৬০৭ দেখুনঃ অন্ততঃ উপরের ১টি সমস্যা                                                                                                                                           |                  | ১=হ্যাঁ                                                                                                                                                                                                                                                                                                                                  | ২=না                     |           | ৬১৭                      |
| ৬০৯ | এই সকল সমস্যাগুলোর জন্য আপনি কি কোন সেবা নিয়েছিলেন? বাড়ীতে অথবা অন্য কোথাও ?                                                                                               |                  | ১=হ্যাঁ                                                                                                                                                                                                                                                                                                                                  | ২=না                     |           | ৬১৭                      |
| ৬১০ | এ সমস্যাগুলোর জন্য প্রথম কোথায় সেবা নিয়েছিলেন?<br><br>(জন্মের প্রথম মাসের সমস্যার জন্য)<br><br>একটি মাত্র উত্তর রেকর্ড করুন যেখানে মহিলা / তার পরিবার প্রথম সেবা নিয়েছিল। |                  | 1=Home<br>2=H & FWC<br>3=Community Clinic<br>4=UHC South<br>5=UHC North<br>6=Private Clinic Matlab<br>7=MCWC Chandpur                                                                                                                                                                                                                    |                          |           | <input type="checkbox"/> |

|     |                                                                                                                                                                     |                                                                                                                                                                                                                                                                                                                              |                          |
|-----|---------------------------------------------------------------------------------------------------------------------------------------------------------------------|------------------------------------------------------------------------------------------------------------------------------------------------------------------------------------------------------------------------------------------------------------------------------------------------------------------------------|--------------------------|
|     |                                                                                                                                                                     | 8=Private Clinic Chandpur<br>9=Chandpur District Hospital<br>10=Other District Hospital<br>11=Other MCWC<br>12=Other Private Clinic<br>13=Other UHC<br>14=ICMH, Matuail, Dhaka<br>15=NGO<br>16=Matlab icddr,b<br>17=Pharmacy<br>18=Homeopathic<br>19=Others (Specify)                                                        |                          |
| ৬১১ | কে এই সেবা / চিকিৎসা দিয়েছিলেন ?<br><br>(জন্মের প্রথম মাসের সমস্যার জন্য)<br><br>একটি মাত্র উত্তর রেকর্ড করুন যার কাছ থেকে মহিলা / তার পরিবার প্রথম সেবা পেয়েছিল। | 1= Doctors<br>2= Nurse/Midwives<br>3= Family Welfare Assistant<br>4= Family Welfare Visitor<br>5= Traditional Birth Attendant<br>6= Community Health Care Provider<br>7= Health Assistant<br>8=Village doctor/ Pharmacy<br>9=Spiritual healer<br>10=Homeopathic<br>11=Kabiraj/Hakim<br>12=NGO worker<br>13= Others (Specify) | <input type="checkbox"/> |
| ৬১২ | আপনার (নাম) কি ধরনের চিকিৎসা পেয়েছিল ?<br><br>(জন্মের প্রথম মাসের সমস্যার জন্য)<br><br>সকল উত্তর রেকর্ড করুন।                                                      | ১=ফার্মেসী থেকে ঔষধ<br>২=FWV/CHCP থেকে রেফারেল<br>৩=FWV/CHCP থেকে পরামর্শ<br>৪=পানি পড়া/দ্রব্য<br>৫=তাবিজ<br>৬=হোমিও ঔষধ<br>৭=শিরায় স্যালাইন<br>৮=ডাক্তার/নার্স এর নিকট হতে ঔষধ<br>৯=কবিরাজি/হেকিমি ঔষধ<br>১০=অন্যান্য (নির্দিষ্ট করুন) _____                                                                              | <input type="checkbox"/> |

|     |                                                                                                               |                                                          |                                                                 |
|-----|---------------------------------------------------------------------------------------------------------------|----------------------------------------------------------|-----------------------------------------------------------------|
| ৬১৩ | এই সমস্যার চিকিৎসার জন্য আপনার বাচ্চাকে কি কোথাও রেফার করা হয়েছিল ?<br><br>(জন্মের প্রথম মাসের সমস্যার জন্য) | ১=হ্যাঁ<br>২=না                                          | <input type="checkbox"/><br><input checked="" type="checkbox"/> |
| ৬১৪ | কোথায় আপনার বাচ্চাকে রেফার করা হয়েছিল?<br><br>(জন্মের প্রথম মাসের সমস্যার জন্য)                             | 1=Home<br>2=H & FWC<br>3=Community Clinic<br>4=UHC South | <input type="checkbox"/><br><input checked="" type="checkbox"/> |

|                                                          |                                                                                                                        |                                                                                                                                                                                                                                                                                                                                                         |                                 |
|----------------------------------------------------------|------------------------------------------------------------------------------------------------------------------------|---------------------------------------------------------------------------------------------------------------------------------------------------------------------------------------------------------------------------------------------------------------------------------------------------------------------------------------------------------|---------------------------------|
|                                                          |                                                                                                                        | 5=UHC North<br>6=Private Clinic Matlab<br>7=MCWC Chandpur<br>8=Private Clinic Chandpur<br>9=Chandpur District Hospital<br>10=Other District Hospital<br>11=Other MCWC<br>12=Other Private Clinic<br>13=Other UHC<br>14=ICMH, Matuail, Dhaka<br>15=NGO<br>16=Matlab icddr,b<br>17=Others (Specify)                                                       |                                 |
| ৬১৫                                                      | আপনি কি রেফার্ড স্থানে গিয়েছিলেন ?<br>(জন্মের প্রথম মাসের সমস্যার জন্য)                                               | ১=হ্যাঁ<br>২=না                                                                                                                                                                                                                                                                                                                                         | ৬১৫<br><input type="checkbox"/> |
| ৬১৬                                                      | যদি রেফারকরা স্থানে না যেয়ে থাকেন তবে তার কারণ কি?<br>(জন্মের প্রথম মাসের সমস্যার জন্য)<br><br>সকল উত্তর রেকর্ড করুন। | ১=মা প্রয়োজন মনে করেন নি<br>২=স্বামী/পরিবার প্রয়োজন মনে করেন নি<br>৩= অন্য প্রয়োজন ছিল<br>৪=সেবা কেন্দ্র অনেক দূরে<br>৫=কোন যানবাহন ছিল না<br>৬=শিশুদের দেখার কেউ ছিল না<br>৭=খরচ অনেক বেশী<br>৮=সেবা মানসম্মত নয়<br>৯=জানতাম না কোথায় যেতে হবে<br>১০=যাবার সময় ছিল না<br>১১=টাকা যোগার করা সহজ নয়<br>১২=অন্যান্য (নির্দিষ্ট করুন)<br>৯৯=জানি না | ৬১৬<br><input type="checkbox"/> |
| এখন আমি আপনাকে বাচ্চার খাবারের ধরণ সম্পর্কে প্রশ্ন করবো: |                                                                                                                        |                                                                                                                                                                                                                                                                                                                                                         |                                 |
| ৬১৭                                                      | কত মাস পর্যন্ত আপনি বাচ্চাকে বুকের দুধ দিয়েছিলেন ?                                                                    | মাস <input type="text"/> <input type="text"/><br>দিন <input type="text"/> <input type="text"/><br>৯৬= কখনও বুকের দুধ দেয় নাই<br>৯৮= এখনও বুকের দুধ খায়<br>৯৯= জানি না                                                                                                                                                                                 | <input type="checkbox"/>        |
| ৬১৮                                                      | বুকের দুধ ছাড়া আপনার বাচ্চাকে কি কখনোই কোন শক্ত বা নরম (Semi-Solid) কিছু খেতে / পান করতে দিয়েছেন?                    | ১=হ্যাঁ<br>২=না                                                                                                                                                                                                                                                                                                                                         | <input type="checkbox"/>        |
| ৬১৯                                                      | কোন বয়সে বাচ্চাকে বুকের দুধ ছাড়া প্রথম অন্য খাবার/পানীয় দিয়েছিলেন?                                                 | মাস <input type="text"/> <input type="text"/><br>দিন <input type="text"/> <input type="text"/><br>৯৯=জানি না                                                                                                                                                                                                                                            | <input type="checkbox"/>        |
| ৬২০                                                      | বুকের দুধ ছাড়া আপনার বাচ্চাকে আর কি দিয়েছেন?<br><br>সকল উত্তর রেকর্ড করুন।                                           | ১=শুধু পানি<br>২=চিনির সরবৎ/মধু/ফলের রস<br>৩=বাচ্চার গুঁড়ো দুধ<br>৪=গরু/ছাগলের দুধ                                                                                                                                                                                                                                                                     | <input type="checkbox"/>        |

|                                                                                    |                                                                                                                                                  |                                                                                                                                                                                                                                                                                                                                                                                                                                                                                                                                                                                                                                                                                                                                                                                                                                                                                                                                                                                                                                                                                                                                                                                                 |                      |         |      |  |                          |         |      |  |                    |         |      |  |                  |         |      |  |                |         |      |  |                 |         |      |  |               |         |      |  |               |         |      |  |                  |         |      |  |     |         |      |  |    |         |      |  |                |         |      |  |            |         |      |  |         |         |      |  |                           |         |      |  |  |
|------------------------------------------------------------------------------------|--------------------------------------------------------------------------------------------------------------------------------------------------|-------------------------------------------------------------------------------------------------------------------------------------------------------------------------------------------------------------------------------------------------------------------------------------------------------------------------------------------------------------------------------------------------------------------------------------------------------------------------------------------------------------------------------------------------------------------------------------------------------------------------------------------------------------------------------------------------------------------------------------------------------------------------------------------------------------------------------------------------------------------------------------------------------------------------------------------------------------------------------------------------------------------------------------------------------------------------------------------------------------------------------------------------------------------------------------------------|----------------------|---------|------|--|--------------------------|---------|------|--|--------------------|---------|------|--|------------------|---------|------|--|----------------|---------|------|--|-----------------|---------|------|--|---------------|---------|------|--|---------------|---------|------|--|------------------|---------|------|--|-----|---------|------|--|----|---------|------|--|----------------|---------|------|--|------------|---------|------|--|---------|---------|------|--|---------------------------|---------|------|--|--|
|                                                                                    |                                                                                                                                                  | ৫=অন্য তরল খাদ্য<br>৬=কলা/পেপে/আম<br>৭=সবুজ শাকসবজী<br>৮=ভাত, গম, সুজি<br>৯=মাংস/মাছ/ডিম<br>১০=ডাল<br>১১=চা<br>১২=এলোপ্যাথিক ঔষধ<br>১৩=ওরস্যালাইন<br>১৪=খিচুড়ী<br>১৫=অন্যান্য (নির্দিষ্ট করুন)<br>১৬=কিছুই না                                                                                                                                                                                                                                                                                                                                                                                                                                                                                                                                                                                                                                                                                                                                                                                                                                                                                                                                                                                  |                      |         |      |  |                          |         |      |  |                    |         |      |  |                  |         |      |  |                |         |      |  |                 |         |      |  |               |         |      |  |               |         |      |  |                  |         |      |  |     |         |      |  |    |         |      |  |                |         |      |  |            |         |      |  |         |         |      |  |                           |         |      |  |  |
| ৬২১                                                                                | আপনার বাচ্চাকে বুকের দুধ ছাড়া অন্য খাবার / পানীয় কেন দিয়েছিলেন?<br><br>সকল উত্তর রেকর্ড করুন।                                                 | ১=বাচ্চার বয়স ৬ মাসের বেশী<br>২=বুকে পর্যাপ্ত দুধ ছিল না<br>৩=বুকের দুধ বাতাস লেগে নষ্ট হয়ে গেছে<br>৪=দুধ খাওয়ালে পাতলা পায়খানা হতো<br>৫=দাই/ডাক্তার নিষেধ করেছে<br>৬=বুকের দুধ খুবই পাতলা<br>৭=বাচ্চা বড় হয়েছে অতিরিক্ত খাবার দরকার<br>৮=শুধু মাত্র বুকের দুধ খাওয়ানোর উপকারিতা জানে না<br>৯=অন্যান্য (নির্দিষ্ট করুন)                                                                                                                                                                                                                                                                                                                                                                                                                                                                                                                                                                                                                                                                                                                                                                                                                                                                  |                      |         |      |  |                          |         |      |  |                    |         |      |  |                  |         |      |  |                |         |      |  |                 |         |      |  |               |         |      |  |               |         |      |  |                  |         |      |  |     |         |      |  |    |         |      |  |                |         |      |  |            |         |      |  |         |         |      |  |                           |         |      |  |  |
| ৬২২                                                                                | দেখুন ১০৩ঃ বাচ্চা জীবিত                                                                                                                          | ১=হ্যাঁ ২=না                                                                                                                                                                                                                                                                                                                                                                                                                                                                                                                                                                                                                                                                                                                                                                                                                                                                                                                                                                                                                                                                                                                                                                                    | ৭০১                  |         |      |  |                          |         |      |  |                    |         |      |  |                  |         |      |  |                |         |      |  |                 |         |      |  |               |         |      |  |               |         |      |  |                  |         |      |  |     |         |      |  |    |         |      |  |                |         |      |  |            |         |      |  |         |         |      |  |                           |         |      |  |  |
| ৬২৩                                                                                | গত ২৪ ঘন্টায় আপনার বাচ্চা কতবার বুকের দুধ ছাড়া অন্য শক্ত বা নরম (Semi-Solid or Soft) খাবার খেয়েছে?<br>যদি ৭ বার বা তার বেশী হয় রেকর্ড করুন ৭ | <input type="text"/>                                                                                                                                                                                                                                                                                                                                                                                                                                                                                                                                                                                                                                                                                                                                                                                                                                                                                                                                                                                                                                                                                                                                                                            | <input type="text"/> |         |      |  |                          |         |      |  |                    |         |      |  |                  |         |      |  |                |         |      |  |                 |         |      |  |               |         |      |  |               |         |      |  |                  |         |      |  |     |         |      |  |    |         |      |  |                |         |      |  |            |         |      |  |         |         |      |  |                           |         |      |  |  |
| ৬২৪                                                                                | গত ২৪ ঘন্টায় বাচ্চাকে নীচের খাবারের কোন একটি কি দিয়েছিলেন?                                                                                     | <table border="1"> <tr> <td>পানি</td> <td>১=হ্যাঁ</td> <td>২=না</td> <td></td> </tr> <tr> <td>চিনির সরবৎ / মধু/ফলের রস</td> <td>১=হ্যাঁ</td> <td>২=না</td> <td></td> </tr> <tr> <td>বাচ্চার ঠুঁড়ে দুধ</td> <td>১=হ্যাঁ</td> <td>২=না</td> <td></td> </tr> <tr> <td>গরু / ছাগলের দুধ</td> <td>১=হ্যাঁ</td> <td>২=না</td> <td></td> </tr> <tr> <td>অন্য তরল খাদ্য</td> <td>১=হ্যাঁ</td> <td>২=না</td> <td></td> </tr> <tr> <td>কলা / পেপে / আম</td> <td>১=হ্যাঁ</td> <td>২=না</td> <td></td> </tr> <tr> <td>সবুজ শাক-সবজী</td> <td>১=হ্যাঁ</td> <td>২=না</td> <td></td> </tr> <tr> <td>ভাত, গম, সুজি</td> <td>১=হ্যাঁ</td> <td>২=না</td> <td></td> </tr> <tr> <td>মাংস / মাছ / ডিম</td> <td>১=হ্যাঁ</td> <td>২=না</td> <td></td> </tr> <tr> <td>ডাল</td> <td>১=হ্যাঁ</td> <td>২=না</td> <td></td> </tr> <tr> <td>চা</td> <td>১=হ্যাঁ</td> <td>২=না</td> <td></td> </tr> <tr> <td>এলোপ্যাথিক ঔষধ</td> <td>১=হ্যাঁ</td> <td>২=না</td> <td></td> </tr> <tr> <td>ওরস্যালাইন</td> <td>১=হ্যাঁ</td> <td>২=না</td> <td></td> </tr> <tr> <td>খিচুড়ী</td> <td>১=হ্যাঁ</td> <td>২=না</td> <td></td> </tr> <tr> <td>অন্যান্য (নির্দিষ্ট করুন)</td> <td>১=হ্যাঁ</td> <td>২=না</td> <td></td> </tr> </table> | পানি                 | ১=হ্যাঁ | ২=না |  | চিনির সরবৎ / মধু/ফলের রস | ১=হ্যাঁ | ২=না |  | বাচ্চার ঠুঁড়ে দুধ | ১=হ্যাঁ | ২=না |  | গরু / ছাগলের দুধ | ১=হ্যাঁ | ২=না |  | অন্য তরল খাদ্য | ১=হ্যাঁ | ২=না |  | কলা / পেপে / আম | ১=হ্যাঁ | ২=না |  | সবুজ শাক-সবজী | ১=হ্যাঁ | ২=না |  | ভাত, গম, সুজি | ১=হ্যাঁ | ২=না |  | মাংস / মাছ / ডিম | ১=হ্যাঁ | ২=না |  | ডাল | ১=হ্যাঁ | ২=না |  | চা | ১=হ্যাঁ | ২=না |  | এলোপ্যাথিক ঔষধ | ১=হ্যাঁ | ২=না |  | ওরস্যালাইন | ১=হ্যাঁ | ২=না |  | খিচুড়ী | ১=হ্যাঁ | ২=না |  | অন্যান্য (নির্দিষ্ট করুন) | ১=হ্যাঁ | ২=না |  |  |
| পানি                                                                               | ১=হ্যাঁ                                                                                                                                          | ২=না                                                                                                                                                                                                                                                                                                                                                                                                                                                                                                                                                                                                                                                                                                                                                                                                                                                                                                                                                                                                                                                                                                                                                                                            |                      |         |      |  |                          |         |      |  |                    |         |      |  |                  |         |      |  |                |         |      |  |                 |         |      |  |               |         |      |  |               |         |      |  |                  |         |      |  |     |         |      |  |    |         |      |  |                |         |      |  |            |         |      |  |         |         |      |  |                           |         |      |  |  |
| চিনির সরবৎ / মধু/ফলের রস                                                           | ১=হ্যাঁ                                                                                                                                          | ২=না                                                                                                                                                                                                                                                                                                                                                                                                                                                                                                                                                                                                                                                                                                                                                                                                                                                                                                                                                                                                                                                                                                                                                                                            |                      |         |      |  |                          |         |      |  |                    |         |      |  |                  |         |      |  |                |         |      |  |                 |         |      |  |               |         |      |  |               |         |      |  |                  |         |      |  |     |         |      |  |    |         |      |  |                |         |      |  |            |         |      |  |         |         |      |  |                           |         |      |  |  |
| বাচ্চার ঠুঁড়ে দুধ                                                                 | ১=হ্যাঁ                                                                                                                                          | ২=না                                                                                                                                                                                                                                                                                                                                                                                                                                                                                                                                                                                                                                                                                                                                                                                                                                                                                                                                                                                                                                                                                                                                                                                            |                      |         |      |  |                          |         |      |  |                    |         |      |  |                  |         |      |  |                |         |      |  |                 |         |      |  |               |         |      |  |               |         |      |  |                  |         |      |  |     |         |      |  |    |         |      |  |                |         |      |  |            |         |      |  |         |         |      |  |                           |         |      |  |  |
| গরু / ছাগলের দুধ                                                                   | ১=হ্যাঁ                                                                                                                                          | ২=না                                                                                                                                                                                                                                                                                                                                                                                                                                                                                                                                                                                                                                                                                                                                                                                                                                                                                                                                                                                                                                                                                                                                                                                            |                      |         |      |  |                          |         |      |  |                    |         |      |  |                  |         |      |  |                |         |      |  |                 |         |      |  |               |         |      |  |               |         |      |  |                  |         |      |  |     |         |      |  |    |         |      |  |                |         |      |  |            |         |      |  |         |         |      |  |                           |         |      |  |  |
| অন্য তরল খাদ্য                                                                     | ১=হ্যাঁ                                                                                                                                          | ২=না                                                                                                                                                                                                                                                                                                                                                                                                                                                                                                                                                                                                                                                                                                                                                                                                                                                                                                                                                                                                                                                                                                                                                                                            |                      |         |      |  |                          |         |      |  |                    |         |      |  |                  |         |      |  |                |         |      |  |                 |         |      |  |               |         |      |  |               |         |      |  |                  |         |      |  |     |         |      |  |    |         |      |  |                |         |      |  |            |         |      |  |         |         |      |  |                           |         |      |  |  |
| কলা / পেপে / আম                                                                    | ১=হ্যাঁ                                                                                                                                          | ২=না                                                                                                                                                                                                                                                                                                                                                                                                                                                                                                                                                                                                                                                                                                                                                                                                                                                                                                                                                                                                                                                                                                                                                                                            |                      |         |      |  |                          |         |      |  |                    |         |      |  |                  |         |      |  |                |         |      |  |                 |         |      |  |               |         |      |  |               |         |      |  |                  |         |      |  |     |         |      |  |    |         |      |  |                |         |      |  |            |         |      |  |         |         |      |  |                           |         |      |  |  |
| সবুজ শাক-সবজী                                                                      | ১=হ্যাঁ                                                                                                                                          | ২=না                                                                                                                                                                                                                                                                                                                                                                                                                                                                                                                                                                                                                                                                                                                                                                                                                                                                                                                                                                                                                                                                                                                                                                                            |                      |         |      |  |                          |         |      |  |                    |         |      |  |                  |         |      |  |                |         |      |  |                 |         |      |  |               |         |      |  |               |         |      |  |                  |         |      |  |     |         |      |  |    |         |      |  |                |         |      |  |            |         |      |  |         |         |      |  |                           |         |      |  |  |
| ভাত, গম, সুজি                                                                      | ১=হ্যাঁ                                                                                                                                          | ২=না                                                                                                                                                                                                                                                                                                                                                                                                                                                                                                                                                                                                                                                                                                                                                                                                                                                                                                                                                                                                                                                                                                                                                                                            |                      |         |      |  |                          |         |      |  |                    |         |      |  |                  |         |      |  |                |         |      |  |                 |         |      |  |               |         |      |  |               |         |      |  |                  |         |      |  |     |         |      |  |    |         |      |  |                |         |      |  |            |         |      |  |         |         |      |  |                           |         |      |  |  |
| মাংস / মাছ / ডিম                                                                   | ১=হ্যাঁ                                                                                                                                          | ২=না                                                                                                                                                                                                                                                                                                                                                                                                                                                                                                                                                                                                                                                                                                                                                                                                                                                                                                                                                                                                                                                                                                                                                                                            |                      |         |      |  |                          |         |      |  |                    |         |      |  |                  |         |      |  |                |         |      |  |                 |         |      |  |               |         |      |  |               |         |      |  |                  |         |      |  |     |         |      |  |    |         |      |  |                |         |      |  |            |         |      |  |         |         |      |  |                           |         |      |  |  |
| ডাল                                                                                | ১=হ্যাঁ                                                                                                                                          | ২=না                                                                                                                                                                                                                                                                                                                                                                                                                                                                                                                                                                                                                                                                                                                                                                                                                                                                                                                                                                                                                                                                                                                                                                                            |                      |         |      |  |                          |         |      |  |                    |         |      |  |                  |         |      |  |                |         |      |  |                 |         |      |  |               |         |      |  |               |         |      |  |                  |         |      |  |     |         |      |  |    |         |      |  |                |         |      |  |            |         |      |  |         |         |      |  |                           |         |      |  |  |
| চা                                                                                 | ১=হ্যাঁ                                                                                                                                          | ২=না                                                                                                                                                                                                                                                                                                                                                                                                                                                                                                                                                                                                                                                                                                                                                                                                                                                                                                                                                                                                                                                                                                                                                                                            |                      |         |      |  |                          |         |      |  |                    |         |      |  |                  |         |      |  |                |         |      |  |                 |         |      |  |               |         |      |  |               |         |      |  |                  |         |      |  |     |         |      |  |    |         |      |  |                |         |      |  |            |         |      |  |         |         |      |  |                           |         |      |  |  |
| এলোপ্যাথিক ঔষধ                                                                     | ১=হ্যাঁ                                                                                                                                          | ২=না                                                                                                                                                                                                                                                                                                                                                                                                                                                                                                                                                                                                                                                                                                                                                                                                                                                                                                                                                                                                                                                                                                                                                                                            |                      |         |      |  |                          |         |      |  |                    |         |      |  |                  |         |      |  |                |         |      |  |                 |         |      |  |               |         |      |  |               |         |      |  |                  |         |      |  |     |         |      |  |    |         |      |  |                |         |      |  |            |         |      |  |         |         |      |  |                           |         |      |  |  |
| ওরস্যালাইন                                                                         | ১=হ্যাঁ                                                                                                                                          | ২=না                                                                                                                                                                                                                                                                                                                                                                                                                                                                                                                                                                                                                                                                                                                                                                                                                                                                                                                                                                                                                                                                                                                                                                                            |                      |         |      |  |                          |         |      |  |                    |         |      |  |                  |         |      |  |                |         |      |  |                 |         |      |  |               |         |      |  |               |         |      |  |                  |         |      |  |     |         |      |  |    |         |      |  |                |         |      |  |            |         |      |  |         |         |      |  |                           |         |      |  |  |
| খিচুড়ী                                                                            | ১=হ্যাঁ                                                                                                                                          | ২=না                                                                                                                                                                                                                                                                                                                                                                                                                                                                                                                                                                                                                                                                                                                                                                                                                                                                                                                                                                                                                                                                                                                                                                                            |                      |         |      |  |                          |         |      |  |                    |         |      |  |                  |         |      |  |                |         |      |  |                 |         |      |  |               |         |      |  |               |         |      |  |                  |         |      |  |     |         |      |  |    |         |      |  |                |         |      |  |            |         |      |  |         |         |      |  |                           |         |      |  |  |
| অন্যান্য (নির্দিষ্ট করুন)                                                          | ১=হ্যাঁ                                                                                                                                          | ২=না                                                                                                                                                                                                                                                                                                                                                                                                                                                                                                                                                                                                                                                                                                                                                                                                                                                                                                                                                                                                                                                                                                                                                                                            |                      |         |      |  |                          |         |      |  |                    |         |      |  |                  |         |      |  |                |         |      |  |                 |         |      |  |               |         |      |  |               |         |      |  |                  |         |      |  |     |         |      |  |    |         |      |  |                |         |      |  |            |         |      |  |         |         |      |  |                           |         |      |  |  |
| <b>SECTION 7: PERCEPTIONS OF LOCAL FACILITY (স্থানীয় সুবিধা সম্পর্কে উপলব্ধি)</b> |                                                                                                                                                  |                                                                                                                                                                                                                                                                                                                                                                                                                                                                                                                                                                                                                                                                                                                                                                                                                                                                                                                                                                                                                                                                                                                                                                                                 |                      |         |      |  |                          |         |      |  |                    |         |      |  |                  |         |      |  |                |         |      |  |                 |         |      |  |               |         |      |  |               |         |      |  |                  |         |      |  |     |         |      |  |    |         |      |  |                |         |      |  |            |         |      |  |         |         |      |  |                           |         |      |  |  |
| ৭০১                                                                                | আপনি কি আপনার এলাকার কোন স্বাস্থ্যকেন্দ্র / হাসপাতালের নাম জানেন যেখানে একজন মহিলা স্বাস্থ্য সমস্যা বা সন্তান প্রসবের জন্য                       | ১=হ্যাঁ<br>২=না                                                                                                                                                                                                                                                                                                                                                                                                                                                                                                                                                                                                                                                                                                                                                                                                                                                                                                                                                                                                                                                                                                                                                                                 | ৮০১                  |         |      |  |                          |         |      |  |                    |         |      |  |                  |         |      |  |                |         |      |  |                 |         |      |  |               |         |      |  |               |         |      |  |                  |         |      |  |     |         |      |  |    |         |      |  |                |         |      |  |            |         |      |  |         |         |      |  |                           |         |      |  |  |

|     | যেতে পারেন ?                                                                                                                                            |                                                                                                                                                                                                                                                                                                                               |                          |
|-----|---------------------------------------------------------------------------------------------------------------------------------------------------------|-------------------------------------------------------------------------------------------------------------------------------------------------------------------------------------------------------------------------------------------------------------------------------------------------------------------------------|--------------------------|
| ৭০২ | যদি জানেন: সেটা কোথায় ?<br><br>সকল উত্তর রেকর্ড করুন।                                                                                                  | 1=H & FWC<br>2=Community Clinic<br>3=UHC South<br>4=UHC North<br>5=Private Clinic Matlab<br>6=MCWC Chandpur<br>7=Private Clinic Chandpur<br>8=Chandpur District Hospital<br>9=Other District Hospital<br>10=Other MCWC<br>11=Other Private Clinic<br>12=Other UHC<br>13=ICMH, Matuail, Dhaka<br>14=NGO<br>15=Others (Specify) | <input type="checkbox"/> |
| ৭০৩ | যদি একটির বেশী সেবা কেন্দ্রের নাম বলে থাকেন তাহলে সবচেয়ে কাছে কোনটি?                                                                                   | 1=H & FWC<br>2=Community Clinic<br>3=UHC South<br>4=UHC North<br>5=Private Clinic Matlab<br>6=MCWC Chandpur<br>7=Private Clinic Chandpur<br>8=Chandpur District Hospital<br>9=Other District Hospital<br>10=Other MCWC<br>11=Other Private Clinic<br>12=Other UHC<br>13=ICMH, Matuail, Dhaka<br>14=NGO<br>15=Others (Specify) | <input type="checkbox"/> |
| ৭০৪ | যদি হাসপাতাল / স্বাস্থ্যকেন্দ্রের সেবাদানকারীর কোন সেবা আপনার ভাল লেগে থাকে তাহলে তা কি কি?<br><br>প্রোব করুন : আর কিছু ?<br><br>সকল উত্তর রেকর্ড করুন। | ১=ভাল ব্যবহার<br>২=ঊষধ সরবরাহ পাওয়া<br>৩=অপেক্ষা করতে হয়নি সেবার জন্য<br>৪=চিকিৎসা কার্যকরী ছিল<br>৫=আপনার প্রশ্নের উত্তর দেওয়া<br>৬=খরচ আওতার মধ্যে<br>৭=পরিষ্কার<br>৮=বন্ধুভাবাপন্ন এবং কথা বার্তায় ভাল<br>৯=অন্যান্য (নির্দিষ্ট করুন) _____<br>১০=জানি না/যাই নাই                                                      | <input type="checkbox"/> |
| ৭০৫ | যদি হাসপাতাল / স্বাস্থ্য কেন্দ্রের সেবাদানকারীর কোন সেবা আপনার ভাল না লেগে থাকে তাহলে তা কি কি?                                                         | ১=খারাপ ব্যবহার<br>২=ঊষধ না পাওয়া<br>৩=দেরিতে চিকিৎসা শুরু করা                                                                                                                                                                                                                                                               | <input type="checkbox"/> |



|     |                                                                                               |                                                                                                                                                                                            |                          |
|-----|-----------------------------------------------------------------------------------------------|--------------------------------------------------------------------------------------------------------------------------------------------------------------------------------------------|--------------------------|
|     | প্রোব করুন: আরও কিছু।<br>সকল উত্তর রেকর্ড করুন।                                               | ৪=খরচ অনেক বেশী/সামর্থের বাইরে<br>৫=জিজ্ঞাসা করলে উত্তর না দেয়া<br>৬=অপরিষ্কার<br>৭=বন্ধুভাবাপন্ন না<br>৮=চিকিৎসায় ভাল হয় নি<br>৯=অন্যান্য (নির্দিষ্ট করুন) _____<br>১০=জানি না/যাই নাই |                          |
| ৭০৬ | আপনি এই স্বাস্থ্যকেন্দ্রে বা হাসপাতালের সেবা সম্পর্কে কিভাবে জানেন?<br>সকল উত্তর রেকর্ড করুন। | ১=আগেও এইস্থানে স্বাস্থ্য সেবা নিয়েছেন<br>২=পরিবারের কাছ থেকে জেনেছেন<br>৩=বন্ধুদের কাছ থেকে জেনেছেন<br>৪=অন্যান্য (নির্দিষ্ট করুন) _____<br>৯৯=জানেনা                                    | <input type="checkbox"/> |

**SECTION 8: SOCIO-ECONOMIC STATUS (SES)**

|                                                 |                      |
|-------------------------------------------------|----------------------|
| CID of Household Head                           | <input type="text"/> |
| RID of Household Head                           | <input type="text"/> |
| CID of respondent if s/he is not Household Head | <input type="text"/> |

**জমি-জমা সংক্রান্ত তথ্য:**

|     |                                                                             |                      |                      |                      |                      |
|-----|-----------------------------------------------------------------------------|----------------------|----------------------|----------------------|----------------------|
| ৮০১ | আপনার খানায় জমির পরিমাণ কত?<br>বসত জমি (পুকুর/ডোবা সহ)<br>কৃষি জমি (নিজের) | শতক                  | কানি                 | গন্ডা                | কড়া                 |
|     |                                                                             | <input type="text"/> | <input type="text"/> | <input type="text"/> | <input type="text"/> |
|     |                                                                             | <input type="text"/> | <input type="text"/> | <input type="text"/> | <input type="text"/> |
|     |                                                                             | ১ কানি=              | শতক,                 | ১ গন্ডা=             | শতক, ১ কড়া=         |
|     |                                                                             |                      | শতক,                 |                      | শতক                  |

**আয়ের উৎস:**

|     |                                                                                    |    |                                                                          |         |      |                          |
|-----|------------------------------------------------------------------------------------|----|--------------------------------------------------------------------------|---------|------|--------------------------|
| ৮০২ | (a) গত ১ বছরে (১২ মাস) আপনার খানায় আয়ের উৎস কি কি ছিল?<br>সকল উত্তর রেকর্ড করুন। | ১  | কৃষি (নিজের জমি)                                                         | ১=হ্যাঁ | ২=না | <input type="checkbox"/> |
|     |                                                                                    | ২  | কৃষি (বর্গা ফসল)                                                         | ১=হ্যাঁ | ২=না | <input type="checkbox"/> |
|     |                                                                                    | ৩  | জমি/পুকুর গচ্ছিত/চুক্তিকৃত/ভাড়া দেয়া/নেয়া)                            | ১=হ্যাঁ | ২=না | <input type="checkbox"/> |
|     |                                                                                    | ৪  | দিনমজুর/রিফ্রা চালক/ভ্যান চালক                                           | ১=হ্যাঁ | ২=না | <input type="checkbox"/> |
|     |                                                                                    | ৫  | দক্ষ শ্রমিক (ড্রাইভার/কাঠমিস্ত্রি/সেনিটারী মিস্ত্রি/ইলেকট্রিক মিস্ত্রি)  | ১=হ্যাঁ | ২=না | <input type="checkbox"/> |
|     |                                                                                    | ৬  | মাছ ধরে বিক্রি করে/মাছ চাষ                                               | ১=হ্যাঁ | ২=না | <input type="checkbox"/> |
|     |                                                                                    | ৭  | গবাদি পশু/হাস-মুরগী/পোস্ত্রি খামার/দুধ বিক্রি                            | ১=হ্যাঁ | ২=না | <input type="checkbox"/> |
|     |                                                                                    | ৮  | কুটির শিল্প/হস্ত শিল্প                                                   | ১=হ্যাঁ | ২=না | <input type="checkbox"/> |
|     |                                                                                    | ৯  | দর্জি                                                                    | ১=হ্যাঁ | ২=না | <input type="checkbox"/> |
|     |                                                                                    | ১০ | ক্ষুদ্র ব্যবসা                                                           | ১=হ্যাঁ | ২=না | <input type="checkbox"/> |
|     |                                                                                    | ১১ | মাঝারী ব্যবসা                                                            | ১=হ্যাঁ | ২=না | <input type="checkbox"/> |
|     |                                                                                    | ১২ | ব্যবসা (বিভিন্ন ধরনের বড় ব্যবসা)                                        | ১=হ্যাঁ | ২=না | <input type="checkbox"/> |
|     |                                                                                    | ১৩ | চাকুরী                                                                   | ১=হ্যাঁ | ২=না | <input type="checkbox"/> |
|     | (b) আয়ের প্রধান উৎস কি ছিল?<br>SI No. <input type="text"/>                        | ১৪ | পেনশন                                                                    | ১=হ্যাঁ | ২=না | <input type="checkbox"/> |
|     |                                                                                    | ১৫ | দেশের মধ্যে থেকে টাকা                                                    | ১=হ্যাঁ | ২=না | <input type="checkbox"/> |
|     |                                                                                    | ১৬ | বিদেশ থেকে টাকা                                                          | ১=হ্যাঁ | ২=না | <input type="checkbox"/> |
|     |                                                                                    | ১৭ | কাজের বিনিময়ে খাদ্য                                                     | ১=হ্যাঁ | ২=না | <input type="checkbox"/> |
|     |                                                                                    | ১৮ | বয়স্ক ভাতা/দুস্থ ভাতা/ভিজিডি ভাতা/মুক্তিযোদ্ধা ভাতা/চেয়ারম্যান/মেম্বার | ১=হ্যাঁ | ২=না | <input type="checkbox"/> |
|     |                                                                                    | ১৯ | বাড়ি/দোকান ভাড়া                                                        | ১=হ্যাঁ | ২=না | <input type="checkbox"/> |

|  |    |                                    |         |      |                          |
|--|----|------------------------------------|---------|------|--------------------------|
|  | ২০ | ট্যাক্সি/টেম্পো/অটো ভাড়া থেকে আয় | ১=হ্যাঁ | ২=না | <input type="checkbox"/> |
|  | ২১ | নৌকা/রিম্বা/ভ্যান ভাড়া থেকে আয়   | ১=হ্যাঁ | ২=না | <input type="checkbox"/> |
|  | ২২ | সুদের ব্যবসা                       | ১=হ্যাঁ | ২=না | <input type="checkbox"/> |
|  | ২৩ | সাংবাদিক                           | ১=হ্যাঁ | ২=না | <input type="checkbox"/> |
|  | ২৪ | অন্যান্য (উল্লেখ করুন)             |         |      |                          |

**খাদ্য অনিশ্চয়তা:**

|     |                                                                  |         |      |                          |
|-----|------------------------------------------------------------------|---------|------|--------------------------|
| ৮০৩ | গত ১ বছরে আপনার খানায় সকলের তিনবেলা খাবারের ব্যবস্থা ছিল কি-না? | ১=হ্যাঁ | ২=না | <input type="checkbox"/> |
|-----|------------------------------------------------------------------|---------|------|--------------------------|

**বাসস্থান:**

|     |                                                          |                 |            |               |                          |                          |
|-----|----------------------------------------------------------|-----------------|------------|---------------|--------------------------|--------------------------|
| ৮০৪ | (a) আপনার খানায় কয়টি বাসঘর আছে? (সংখ্যায় উল্লেখ করুন) |                 |            |               | <input type="checkbox"/> |                          |
|     | (b) প্রধান বাসঘর কি দিয়ে তৈরী?                          | <b>উপকরণ</b>    | <b>ছাদ</b> | <b>দেয়াল</b> | <b>মেঝে</b>              |                          |
|     | (নিজে দেখে লিখুন)                                        | পাকা            | ১          | ১             | ১                        | <input type="checkbox"/> |
|     |                                                          | টিন             | ২          | ২             | ২                        | <input type="checkbox"/> |
|     |                                                          | টিন ও বাঁশ      | ৩          | ৩             | ৩                        | <input type="checkbox"/> |
|     |                                                          | টিন ও কাঠ       | ৪          | ৪             | ৪                        | <input type="checkbox"/> |
|     |                                                          | টিন ও অন্যান্য  | ৫          | ৫             | ৫                        | <input type="checkbox"/> |
|     |                                                          | বাঁশ ও অন্যান্য | ৬          | ৬             | ৬                        | <input type="checkbox"/> |
|     |                                                          | কাঁচা (মাটি)    | ৭          | ৭             | ৭                        | <input type="checkbox"/> |
|     |                                                          | কাঠ             | ৮          | ৮             | ৮                        | <input type="checkbox"/> |
|     |                                                          | অন্যান্য        | ৯          | ৯             | ৯                        | <input type="checkbox"/> |

**ব্যবহৃত জিনিসপত্র/সম্পদ:**

|     |                                                  |                                       |         |                          |                          |
|-----|--------------------------------------------------|---------------------------------------|---------|--------------------------|--------------------------|
| ৮০৫ | আপনার বাসার কেউ কি নীচের জিনিসগুলি ব্যবহার করেন? | মাছ ধরার জাল                          | ১=হ্যাঁ | ২=না                     | <input type="checkbox"/> |
|     | সকল উত্তর রেকর্ড করুন।                           | মাছ ধরার নৌকা                         | ১=হ্যাঁ | ২=না                     | <input type="checkbox"/> |
|     |                                                  | নৌকা                                  | ১=হ্যাঁ | ২=না                     | <input type="checkbox"/> |
|     |                                                  | দোকান (মালিকানা)                      | ১=হ্যাঁ | ২=না                     | <input type="checkbox"/> |
|     |                                                  | রিম্বা/ভ্যান                          | ১=হ্যাঁ | ২=না                     | <input type="checkbox"/> |
|     |                                                  | অটো রিম্বা/ইঞ্জিন চালিত রিম্বা/সিএনজি | ১=হ্যাঁ | ২=না                     | <input type="checkbox"/> |
|     |                                                  | পাওয়ার ট্রিলার (চাষাবাদে ব্যবহৃত)    | ১=হ্যাঁ | ২=না                     | <input type="checkbox"/> |
|     |                                                  | পাম্প (সেচ কাজ/পানি উত্তোলনে ব্যবহৃত) | ১=হ্যাঁ | ২=না                     | <input type="checkbox"/> |
|     |                                                  | ধান মাড়ানোর মেশিন                    | ১=হ্যাঁ | ২=না                     | <input type="checkbox"/> |
|     |                                                  | চাষাবাদে ব্যবহৃত যন্ত্রপাতি           | ১=হ্যাঁ | ২=না                     | <input type="checkbox"/> |
|     |                                                  | আইপিএস                                | ১=হ্যাঁ | ২=না                     | <input type="checkbox"/> |
|     |                                                  | কম্পিউটার                             | ১=হ্যাঁ | ২=না                     | <input type="checkbox"/> |
|     |                                                  | জেনারেটর                              | ১=হ্যাঁ | ২=না                     | <input type="checkbox"/> |
|     |                                                  | সৌর বিদ্যুৎ                           | ১=হ্যাঁ | ২=না                     | <input type="checkbox"/> |
|     |                                                  | টিউবওয়েল (অগভীর নলকূপ)               | ১=হ্যাঁ | ২=না                     | <input type="checkbox"/> |
|     |                                                  | টিউবওয়েল (গভীর নলকূপ)                | ১=হ্যাঁ | ২=না                     | <input type="checkbox"/> |
|     |                                                  | কম্বল                                 | ১=হ্যাঁ | ২=না                     | <input type="checkbox"/> |
|     |                                                  | লেপ-তোষক                              | ১=হ্যাঁ | ২=না                     | <input type="checkbox"/> |
|     |                                                  | চেয়ার-টেবিল                          | ১=হ্যাঁ | ২=না                     | <input type="checkbox"/> |
|     |                                                  | ডাইনিং টেবিল                          | ১=হ্যাঁ | ২=না                     | <input type="checkbox"/> |
|     |                                                  | আলমিরা/শোকেস                          | ১=হ্যাঁ | ২=না                     | <input type="checkbox"/> |
|     | সোফা সেট                                         | ১=হ্যাঁ                               | ২=না    | <input type="checkbox"/> |                          |
|     | টেলিভিশন                                         | ১=হ্যাঁ                               | ২=না    | <input type="checkbox"/> |                          |
|     | রেডিও/সিডি/টেপ রেকর্ডার/ডিভিডি                   | ১=হ্যাঁ                               | ২=না    | <input type="checkbox"/> |                          |

|                        |         |      |                          |
|------------------------|---------|------|--------------------------|
| ল্যান্ডফোন/মোবাইল ফোন  | ১=হ্যাঁ | ২=না | <input type="checkbox"/> |
| বাই সাইকেল             | ১=হ্যাঁ | ২=না | <input type="checkbox"/> |
| মোটর সাইকেল            | ১=হ্যাঁ | ২=না | <input type="checkbox"/> |
| ফ্রিজ                  | ১=হ্যাঁ | ২=না | <input type="checkbox"/> |
| ফ্যান                  | ১=হ্যাঁ | ২=না | <input type="checkbox"/> |
| সেলাই মেশিন            | ১=হ্যাঁ | ২=না | <input type="checkbox"/> |
| অন্যান্য (উল্লেখ করুন) |         |      |                          |

**গবাদি পশুপালন:**

|     |                                                       |         |            |                          |
|-----|-------------------------------------------------------|---------|------------|--------------------------|
| ৮০৬ | আপনার খানায় কোন গবাদি পশু আছে? (গরু-ছাগল, হাস-মুরগী) | ১=হ্যাঁ | ২=না       | <input type="checkbox"/> |
| ৮০৭ | যদি হ্যাঁ হয়, তাহলে প্রকার এবং সংখ্যায় উল্লেখ করুন? | প্রকার  |            | সংখ্যা                   |
|     |                                                       | ১       | হাঁস-মুরগী | <input type="checkbox"/> |
|     |                                                       | ২       | ছাগল-ভেড়া | <input type="checkbox"/> |
|     |                                                       | ৩       | গরু-মহিষ   | <input type="checkbox"/> |

**পয়: নিষ্কাশন ব্যবস্থা:**

|     |                                                                 |                                          |         |                          |                          |
|-----|-----------------------------------------------------------------|------------------------------------------|---------|--------------------------|--------------------------|
| ৮০৮ | আপনার নিজের কোন পায়খানা আছে কি?                                | ১=হ্যাঁ                                  | ২=না    | <input type="checkbox"/> |                          |
| ৮০৯ | আপনারা কি ধরনের পায়খানা ব্যবহার করেন?<br><br>(নিজে দেখে লিখুন) | স্যানিটারী ল্যাট্রিন                     | ১=হ্যাঁ | ২=না                     | <input type="checkbox"/> |
|     |                                                                 | রিং/শ্রাব কিস্ত পায়খানা বাহিরে যায় না  | ১=হ্যাঁ | ২=না                     | <input type="checkbox"/> |
|     |                                                                 | রিং/শ্রাব কিস্ত পায়খানা বাহিরে যায়     | ১=হ্যাঁ | ২=না                     | <input type="checkbox"/> |
|     |                                                                 | পাকা পায়খানা কিস্ত পায়খানা বাহিরে যায় | ১=হ্যাঁ | ২=না                     | <input type="checkbox"/> |
|     |                                                                 | কাঁচা পায়খানা                           | ১=হ্যাঁ | ২=না                     | <input type="checkbox"/> |
|     |                                                                 | খোলা মাঠ/ঝোঁপ-ঝাড়                       | ১=হ্যাঁ | ২=না                     | <input type="checkbox"/> |
|     |                                                                 | অন্যান্য (উল্লেখ করুন)                   |         |                          |                          |

**পানীয় জলের উৎস: (১ বছরের মধ্যে)**

|     |                                                                        |                                    |         |                          |                          |
|-----|------------------------------------------------------------------------|------------------------------------|---------|--------------------------|--------------------------|
| ৮১০ | আপনার খানায় ফিল্টার/বিশুদ্ধ পানির ব্যবস্থা আছে কি?                    | ১=হ্যাঁ                            | ২=না    | <input type="checkbox"/> |                          |
| ৮১১ | আপনাদের খাবার পানির প্রধান উৎস কি?<br><br>(বেশীর ভাগ ক্ষেত্রে ব্যবহৃত) | ডিপ টিউবওয়েল (গভীর নলকূপ)         | ১=হ্যাঁ | ২=না                     | <input type="checkbox"/> |
|     |                                                                        | টিউবওয়েল (সবুজ)                   | ১=হ্যাঁ | ২=না                     | <input type="checkbox"/> |
|     |                                                                        | টিউবওয়েল (লাল)                    | ১=হ্যাঁ | ২=না                     | <input type="checkbox"/> |
|     |                                                                        | টিউবওয়েল (এখনো পরীক্ষা করা হয়নি) | ১=হ্যাঁ | ২=না                     | <input type="checkbox"/> |
|     |                                                                        | সাপ্লাই পানি                       | ১=হ্যাঁ | ২=না                     | <input type="checkbox"/> |
|     |                                                                        | বৃষ্টির পানি                       | ১=হ্যাঁ | ২=না                     | <input type="checkbox"/> |
|     |                                                                        | পুকুর                              | ১=হ্যাঁ | ২=না                     | <input type="checkbox"/> |
|     |                                                                        | নদী                                | ১=হ্যাঁ | ২=না                     | <input type="checkbox"/> |
|     |                                                                        | ডোবা/খাল                           | ১=হ্যাঁ | ২=না                     | <input type="checkbox"/> |
|     |                                                                        | অন্যান্য (উল্লেখ করুন)             |         |                          |                          |

**আলোর উৎস:**

|     |                                                                 |                        |         |      |                          |
|-----|-----------------------------------------------------------------|------------------------|---------|------|--------------------------|
| ৮১২ | আপনার বাড়িতে আলোর প্রধান উৎস কি?<br><br>সকল উত্তর রেকর্ড করুন। | কেরোসিন                | ১=হ্যাঁ | ২=না | <input type="checkbox"/> |
|     |                                                                 | বিদ্যুৎ                | ১=হ্যাঁ | ২=না | <input type="checkbox"/> |
|     |                                                                 | সৌর বিদ্যুৎ            | ১=হ্যাঁ | ২=না | <input type="checkbox"/> |
|     |                                                                 | জেনারেটর               | ১=হ্যাঁ | ২=না | <input type="checkbox"/> |
|     |                                                                 | অন্যান্য (উল্লেখ করুন) |         |      |                          |

**জ্বালানী দ্রব্য:**

|                 |                                                                             |                                       |         |      |                          |
|-----------------|-----------------------------------------------------------------------------|---------------------------------------|---------|------|--------------------------|
| ৮১৩             | আপনারা রান্নার জন্য প্রধানত: কি ব্যবহার করেন?<br><br>সকল উত্তর রেকর্ড করুন। | কাঠ/কাঠের গুড়া/ধানের তুস             | ১=হ্যাঁ | ২=না | <input type="checkbox"/> |
|                 |                                                                             | পাতা ও খড়                            | ১=হ্যাঁ | ২=না | <input type="checkbox"/> |
|                 |                                                                             | কেরোসিন (স্টোভ)                       | ১=হ্যাঁ | ২=না | <input type="checkbox"/> |
|                 |                                                                             | গ্যাস (লাইন)                          | ১=হ্যাঁ | ২=না | <input type="checkbox"/> |
|                 |                                                                             | গ্যাস (সিলিন্ডার)                     | ১=হ্যাঁ | ২=না | <input type="checkbox"/> |
|                 |                                                                             | বিদ্যুৎ (ওভেন/রাইস কুকার/মাইক্রোওভেন) | ১=হ্যাঁ | ২=না | <input type="checkbox"/> |
| এন.জি.ও/সমিতি:  |                                                                             |                                       |         |      |                          |
| ৮১৪             | আপনার খানায় কেউ কোন সমিতি বা এন.জি.ও-র সদস্য কি-না?                        |                                       | ১=হ্যাঁ | ২=না | <input type="checkbox"/> |
| ৮১৫             | আপনার খানায় কেউ ঋণ নিয়েছেন কি-না? (৬ মাসের মধ্যে)                         |                                       | ১=হ্যাঁ | ২=না | <input type="checkbox"/> |
| ৮১৬             | যদি হ্যাঁ হয়, তাহলে নিয়মিত ঋণ পরিশোধ করতে পারছেন কি-না?                   |                                       | ১=হ্যাঁ | ২=না | <input type="checkbox"/> |
| ব্যাংক একাউন্ট: |                                                                             |                                       |         |      |                          |
| ৮১৭             | আপনি কিংবা খানার অন্য কারো ব্যাংক একাউন্ট আছে কি-না?                        |                                       | ১=হ্যাঁ | ২=না | <input type="checkbox"/> |

End time: : :

Eddited By:

Code:

Entry By:

Code:

Date:

Date:
