# Supplementary material for: Level and determinants of birth preparedness and complication readiness among pregnant women: A cross sectional study in a rural area in Bangladesh
Source: PubMed Central journal article supplement (PMC6296737; doi:10.1371/journal.pone.0209076), 2018-12-17
Supplement: pone.0209076.s003.pdf [file pone.0209076.s003.pdf]

| Variables                                  | Recall Period       |                     |
|--------------------------------------------|---------------------|---------------------|
|                                            | ≤12 months          | >12 months          |
|                                            | Adjusted OR (95%CI) | Adjusted OR (95%CI) |
| Asset index                                |                     |                     |
| One (Poorest)                              | 1.0                 | 1.0                 |
| Two                                        | 1.89(.91-3.95)      | 1.80(.83-3.88)      |
| Three                                      | 2.34(1.13-5.10)     | 2.08(.930-4.66)     |
| Four                                       | 3.70(1.78-7.70)     | 1.88(.769-4.60)     |
| Five (Richest)                             | 4.55(2.27-9.12)     | 3.58(1.68-7.64)     |
| No. of antenatal care visits               |                     |                     |
| 0-1                                        | 1.0                 | 1.0                 |
| 2-3                                        | 2.59(1.40-4.81)     | 2.32 (1.20-4.47)    |
| ≥ 4                                        | 5.94 (3.25-10.85)   | 6.04(3.16-11.53)    |
| Knowledge of danger signs during pregnancy |                     |                     |
| Poor Knowledge                             | 1.0                 | 1.0                 |
| Good Knowledge                             | 1.5 (.99-2.26)      | 2.6 (1.64-4.12)     |
| Knowledge of danger signs during delivery  |                     |                     |
| Poor Knowledge                             | 1.0                 | 1.0                 |
| Good Knowledge                             | 1.95(1.30-2.92)     | 1.46(.92-2.33)      |
